# Supplementary material for: Global trends in dietary micronutrient supplies and estimated prevalence of inadequate intakes
Source: PLoS One. 2017 Apr 11;12(4):e0175554. doi: 10.1371/journal.pone.0175554 (PMC5388500; doi:10.1371/journal.pone.0175554)
Supplement: S4 Dataset — (CSV) [file pone.0175554.s004.csv]

Zone	Country	ISO3	Year	Population	Fortification	PCDEA	MDI	Tagname	Micronutrient	Units	Estimated Intake	Requirements	Prevalence of Inadequate Intake
WCANA	Afghanistan	AFG	1961	8954000	0	2997	0.773238922	VITC	Vitamin C	mg	0.040921579	0.049955318	62.74626618
WCANA	Afghanistan	AFG	1961	8954000	0	2997	0.773238922	ZN	Zinc	mg	0.001676713	0.001769737	58.32655917
WCANA	Afghanistan	AFG	1961	8954000	0	2997	0.773238922	VITA_RAE	Vitamin A	mcg	0.000274571	0.000463337	84.22556146
WCANA	Afghanistan	AFG	1961	8954000	0	2997	0.773238922	CA	Calcium	mg	0.700043131	0.783091516	63.81456259
WCANA	Afghanistan	AFG	1961	8954000	0	2997	0.773238922	CU	Copper	mcg	0.00197909	0.00056863	0.090733556
WCANA	Afghanistan	AFG	1961	8954000	0	2997	0.773238922	RIBF	Riboflavin	mg	0.001250317	0.000827689	4.437377946
WCANA	Afghanistan	AFG	1961	8954000	0	2997	0.773238922	P	Phosphorus	mg	1.281775545	0.62599695	0.001392936
WCANA	Afghanistan	AFG	1961	8954000	0	2997	0.773238922	VITB6A	Vitamin B6	mg	0.002123666	0.000916184	6.75E-06
WCANA	Afghanistan	AFG	1961	8954000	0	2997	0.773238922	VITB12	Vitamin B12	mcg	2.09E-06	1.60E-06	20.68553439
WCANA	Afghanistan	AFG	1961	8954000	0	2997	0.773238922	FE	Iron	mg	0.006190044	0.00720009	57.91486741
WCANA	Afghanistan	AFG	1961	8954000	0	2997	0.773238922	FOL	Folate	mcg	0.000410879	0.000266739	3.58311401
WCANA	Afghanistan	AFG	1961	8954000	0	2997	0.773238922	THIA	Thiamin	mg	0.001662415	0.000781934	0.008721461
WCANA	Afghanistan	AFG	1961	8954000	0	2997	0.773238922	NIA	Niacin	mg	0.027098284	0.009465239	4.61E-12
WCANA	Afghanistan	AFG	1961	8954000	0	2997	0.773238922	MG	Magnesium	mg	0.589754212	0.227932143	1.08E-08
WCANA	Afghanistan	AFG	1962	9142000	0	2917	0.778249227	FOL	Folate	mcg	0.000401445	0.000266458	4.56412323
WCANA	Afghanistan	AFG	1962	9142000	0	2917	0.778249227	VITB12	Vitamin B12	mcg	2.08E-06	1.60E-06	20.77525835
WCANA	Afghanistan	AFG	1962	9142000	0	2917	0.778249227	CA	Calcium	mg	0.688062389	0.782134941	65.57612565
WCANA	Afghanistan	AFG	1962	9142000	0	2917	0.778249227	FE	Iron	mg	0.006095777	0.007191434	59.34494001
WCANA	Afghanistan	AFG	1962	9142000	0	2917	0.778249227	VITA_RAE	Vitamin A	mcg	0.000273938	0.000462772	84.28681555
WCANA	Afghanistan	AFG	1962	9142000	0	2917	0.778249227	ZN	Zinc	mg	0.001677226	0.001766991	58.05118858
WCANA	Afghanistan	AFG	1962	9142000	0	2917	0.778249227	CU	Copper	mcg	0.001927228	0.000567928	0.110656012
WCANA	Afghanistan	AFG	1962	9142000	0	2917	0.778249227	VITB6A	Vitamin B6	mg	0.002063202	0.000915011	2.59E-05
WCANA	Afghanistan	AFG	1962	9142000	0	2917	0.778249227	VITC	Vitamin C	mg	0.040782689	0.049873294	62.91866725
WCANA	Afghanistan	AFG	1962	9142000	0	2917	0.778249227	P	Phosphorus	mg	1.252986454	0.625237105	0.002958806
WCANA	Afghanistan	AFG	1962	9142000	0	2917	0.778249227	RIBF	Riboflavin	mg	0.001224647	0.000826659	5.426818625
WCANA	Afghanistan	AFG	1962	9142000	0	2917	0.778249227	NIA	Niacin	mg	0.026343266	0.009453935	4.47E-11
WCANA	Afghanistan	AFG	1962	9142000	0	2917	0.778249227	MG	Magnesium	mg	0.574534181	0.227524	5.28E-08
WCANA	Afghanistan	AFG	1962	9142000	0	2917	0.778249227	THIA	Thiamin	mg	0.001645248	0.000781077	0.011303584
WCANA	Afghanistan	AFG	1963	9340000	0	2697	0.79856767	FE	Iron	mg	0.005580539	0.007189282	67.8990819
WCANA	Afghanistan	AFG	1963	9340000	0	2697	0.79856767	VITB6A	Vitamin B6	mg	0.001912358	0.000914375	0.000633454
WCANA	Afghanistan	AFG	1963	9340000	0	2697	0.79856767	MG	Magnesium	mg	0.527796421	0.227370842	6.28E-06
WCANA	Afghanistan	AFG	1963	9340000	0	2697	0.79856767	CA	Calcium	mg	0.685304801	0.781770094	65.95779062
WCANA	Afghanistan	AFG	1963	9340000	0	2697	0.79856767	VITC	Vitamin C	mg	0.040890917	0.04983462	62.5821726
WCANA	Afghanistan	AFG	1963	9340000	0	2697	0.79856767	P	Phosphorus	mg	1.19118441	0.62493584	0.014483731
WCANA	Afghanistan	AFG	1963	9340000	0	2697	0.79856767	ZN	Zinc	mg	0.001690579	0.001765619	56.74961861
WCANA	Afghanistan	AFG	1963	9340000	0	2697	0.79856767	VITB12	Vitamin B12	mcg	2.18E-06	1.60E-06	19.72347459
WCANA	Afghanistan	AFG	1963	9340000	0	2697	0.79856767	CU	Copper	mcg	0.001788633	0.00056764	0.194206444
WCANA	Afghanistan	AFG	1963	9340000	0	2697	0.79856767	NIA	Niacin	mg	0.0239776	0.009449326	3.87E-08
WCANA	Afghanistan	AFG	1963	9340000	0	2697	0.79856767	VITA_RAE	Vitamin A	mcg	0.000283122	0.000462495	82.33287711
WCANA	Afghanistan	AFG	1963	9340000	0	2697	0.79856767	RIBF	Riboflavin	mg	0.001185993	0.000826164	7.327738497
WCANA	Afghanistan	AFG	1963	9340000	0	2697	0.79856767	FOL	Folate	mcg	0.000362703	0.000266337	11.38951377
WCANA	Afghanistan	AFG	1963	9340000	0	2697	0.79856767	THIA	Thiamin	mg	0.001508745	0.000780727	0.094088008
WCANA	Afghanistan	AFG	1964	9547000	0	2953	0.786329853	FOL	Folate	mcg	0.000400998	0.000266248	4.579859692
WCANA	Afghanistan	AFG	1964	9547000	0	2953	0.786329853	P	Phosphorus	mg	1.271790662	0.62471139	0.001712311
WCANA	Afghanistan	AFG	1964	9547000	0	2953	0.786329853	VITC	Vitamin C	mg	0.044982249	0.049806335	52.86226191
WCANA	Afghanistan	AFG	1964	9547000	0	2953	0.786329853	FE	Iron	mg	0.006110417	0.007188077	59.05611337
WCANA	Afghanistan	AFG	1964	9547000	0	2953	0.786329853	CU	Copper	mcg	0.001954865	0.00056744	0.098341629
WCANA	Afghanistan	AFG	1964	9547000	0	2953	0.786329853	VITB6A	Vitamin B6	mg	0.00209402	0.000913877	1.20E-05
WCANA	Afghanistan	AFG	1964	9547000	0	2953	0.786329853	RIBF	Riboflavin	mg	0.001264912	0.000825805	3.816076363
WCANA	Afghanistan	AFG	1964	9547000	0	2953	0.786329853	CA	Calcium	mg	0.717873354	0.781500761	60.69543871
WCANA	Afghanistan	AFG	1964	9547000	0	2953	0.786329853	VITA_RAE	Vitamin A	mcg	0.00029105	0.000462293	80.58745415
WCANA	Afghanistan	AFG	1964	9547000	0	2953	0.786329853	ZN	Zinc	mg	0.001706001	0.001764585	55.28239637
WCANA	Afghanistan	AFG	1964	9547000	0	2953	0.786329853	NIA	Niacin	mg	0.02623913	0.00944612	5.76E-11
WCANA	Afghanistan	AFG	1964	9547000	0	2953	0.786329853	MG	Magnesium	mg	0.57414119	0.227259948	5.13E-08
WCANA	Afghanistan	AFG	1964	9547000	0	2953	0.786329853	VITB12	Vitamin B12	mcg	2.20E-06	1.60E-06	19.49860245
WCANA	Afghanistan	AFG	1964	9547000	0	2953	0.786329853	THIA	Thiamin	mg	0.001652583	0.000780479	0.009779122
WCANA	Afghanistan	AFG	1965	9765000	0	2957	0.793076904	VITB6A	Vitamin B6	mg	0.002094545	0.000913342	1.15E-05
WCANA	Afghanistan	AFG	1965	9765000	0	2957	0.793076904	CA	Calcium	mg	0.742414443	0.78099978	56.5403455
WCANA	Afghanistan	AFG	1965	9765000	0	2957	0.793076904	P	Phosphorus	mg	1.280784687	0.62428512	0.001297305
WCANA	Afghanistan	AFG	1965	9765000	0	2957	0.793076904	NIA	Niacin	mg	0.026232617	0.009441317	5.64E-11
WCANA	Afghanistan	AFG	1965	9765000	0	2957	0.793076904	CU	Copper	mcg	0.001958137	0.000567149	0.09666793
WCANA	Afghanistan	AFG	1965	9765000	0	2957	0.793076904	VITC	Vitamin C	mg	0.046745595	0.0497723	48.81227191
WCANA	Afghanistan	AFG	1965	9765000	0	2957	0.793076904	VITB12	Vitamin B12	mcg	2.27E-06	1.60E-06	18.71396898
WCANA	Afghanistan	AFG	1965	9765000	0	2957	0.793076904	RIBF	Riboflavin	mg	0.00128693	0.000825367	3.115567472
WCANA	Afghanistan	AFG	1965	9765000	0	2957	0.793076904	MG	Magnesium	mg	0.57453542	0.227067627	4.65E-08
WCANA	Afghanistan	AFG	1965	9765000	0	2957	0.793076904	ZN	Zinc	mg	0.001719425	0.001763374	53.97058745
WCANA	Afghanistan	AFG	1965	9765000	0	2957	0.793076904	VITA_RAE	Vitamin A	mcg	0.000298511	0.000462058	78.89157303
WCANA	Afghanistan	AFG	1965	9765000	0	2957	0.793076904	FOL	Folate	mcg	0.000402575	0.000266128	4.372130365
WCANA	Afghanistan	AFG	1965	9765000	0	2957	0.793076904	FE	Iron	mg	0.006118824	0.00718495	58.87343687
WCANA	Afghanistan	AFG	1965	9765000	0	2957	0.793076904	THIA	Thiamin	mg	0.00165683	0.000780113	0.008979835
WCANA	Afghanistan	AFG	1966	9990000	0	2737	0.818135151	FOL	Folate	mcg	0.00037345	0.000265652	8.808839962
WCANA	Afghanistan	AFG	1966	9990000	0	2737	0.818135151	VITB6A	Vitamin B6	mg	0.001961206	0.000911582	0.000205517
WCANA	Afghanistan	AFG	1966	9990000	0	2737	0.818135151	CU	Copper	mcg	0.001831063	0.000566056	0.159645592
WCANA	Afghanistan	AFG	1966	9990000	0	2737	0.818135151	FE	Iron	mg	0.005765811	0.007168674	64.52957011
WCANA	Afghanistan	AFG	1966	9990000	0	2737	0.818135151	NIA	Niacin	mg	0.024406117	0.00942377	1.01E-08
WCANA	Afghanistan	AFG	1966	9990000	0	2737	0.818135151	THIA	Thiamin	mg	0.001534204	0.00077871	0.061044557
WCANA	Afghanistan	AFG	1966	9990000	0	2737	0.818135151	P	Phosphorus	mg	1.218876006	0.623147992	0.006565446
WCANA	Afghanistan	AFG	1966	9990000	0	2737	0.818135151	RIBF	Riboflavin	mg	0.00124755	0.000823827	4.322317113
WCANA	Afghanistan	AFG	1966	9990000	0	2737	0.818135151	VITB12	Vitamin B12	mcg	2.50E-06	1.60E-06	16.5705095
WCANA	Afghanistan	AFG	1966	9990000	0	2737	0.818135151	CA	Calcium	mg	0.726090312	0.779588494	59.04665931
WCANA	Afghanistan	AFG	1966	9990000	0	2737	0.818135151	ZN	Zinc	mg	0.001759032	0.001759016	49.99855879
WCANA	Afghanistan	AFG	1966	9990000	0	2737	0.818135151	MG	Magnesium	mg	0.532915734	0.226395213	3.05E-06
WCANA	Afghanistan	AFG	1966	9990000	0	2737	0.818135151	VITA_RAE	Vitamin A	mcg	0.000317427	0.000461199	74.38478216
WCANA	Afghanistan	AFG	1966	9990000	0	2737	0.818135151	VITC	Vitamin C	mg	0.048306337	0.04964312	45.1539891
WCANA	Afghanistan	AFG	1967	10222000	0	2970	0.811877929	VITA_RAE	Vitamin A	mcg	0.000333056	0.000460557	70.54302621
WCANA	Afghanistan	AFG	1967	10222000	0	2970	0.811877929	CA	Calcium	mg	0.762157658	0.77861478	52.80841235
WCANA	Afghanistan	AFG	1967	10222000	0	2970	0.811877929	VITB12	Vitamin B12	mcg	2.59E-06	1.59E-06	15.82267545
WCANA	Afghanistan	AFG	1967	10222000	0	2970	0.811877929	FOL	Folate	mcg	0.000408871	0.000265285	3.560319222
WCANA	Afghanistan	AFG	1967	10222000	0	2970	0.811877929	THIA	Thiamin	mg	0.001657616	0.000777636	0.008096273
WCANA	Afghanistan	AFG	1967	10222000	0	2970	0.811877929	ZN	Zinc	mg	0.001770662	0.00175566	48.63669842
WCANA	Afghanistan	AFG	1967	10222000	0	2970	0.811877929	VITC	Vitamin C	mg	0.052502856	0.049543205	36.57107523
WCANA	Afghanistan	AFG	1967	10222000	0	2970	0.811877929	VITB6A	Vitamin B6	mg	0.002109682	0.000910205	6.78E-06
WCANA	Afghanistan	AFG	1967	10222000	0	2970	0.811877929	RIBF	Riboflavin	mg	0.001330985	0.000822692	1.972448534
WCANA	Afghanistan	AFG	1967	10222000	0	2970	0.811877929	FE	Iron	mg	0.00611334	0.007156495	58.56299841
WCANA	Afghanistan	AFG	1967	10222000	0	2970	0.811877929	NIA	Niacin	mg	0.026135849	0.009410759	5.85E-11
WCANA	Afghanistan	AFG	1967	10222000	0	2970	0.811877929	P	Phosphorus	mg	1.310478695	0.622449892	0.000490262
WCANA	Afghanistan	AFG	1967	10222000	0	2970	0.811877929	CU	Copper	mcg	0.00197532	0.000565242	0.087858522
WCANA	Afghanistan	AFG	1967	10222000	0	2970	0.811877929	MG	Magnesium	mg	0.576095693	0.225881018	2.79E-08
WCANA	Afghanistan	AFG	1968	10466000	0	2918	0.815020906	FE	Iron	mg	0.005998725	0.007147726	60.34403745
WCANA	Afghanistan	AFG	1968	10466000	0	2918	0.815020906	CA	Calcium	mg	0.76083436	0.777990342	52.92980846
WCANA	Afghanistan	AFG	1968	10466000	0	2918	0.815020906	MG	Magnesium	mg	0.562088222	0.225492201	1.18E-07
WCANA	Afghanistan	AFG	1968	10466000	0	2918	0.815020906	NIA	Niacin	mg	0.025775307	0.009401291	1.62E-10
WCANA	Afghanistan	AFG	1968	10466000	0	2918	0.815020906	P	Phosphorus	mg	1.293560267	0.622134217	0.000791104
WCANA	Afghanistan	AFG	1968	10466000	0	2918	0.815020906	VITB6A	Vitamin B6	mg	0.002077758	0.000909158	1.36E-05
WCANA	Afghanistan	AFG	1968	10466000	0	2918	0.815020906	RIBF	Riboflavin	mg	0.001338086	0.000821882	1.814846806
WCANA	Afghanistan	AFG	1968	10466000	0	2918	0.815020906	VITB12	Vitamin B12	mcg	2.75E-06	1.59E-06	14.63760024
WCANA	Afghanistan	AFG	1968	10466000	0	2918	0.815020906	CU	Copper	mcg	0.001944272	0.00056465	0.098731877
WCANA	Afghanistan	AFG	1968	10466000	0	2918	0.815020906	FOL	Folate	mcg	0.000394733	0.000265013	5.137992152
WCANA	Afghanistan	AFG	1968	10466000	0	2918	0.815020906	VITA_RAE	Vitamin A	mcg	0.000341453	0.000460092	68.42967961
WCANA	Afghanistan	AFG	1968	10466000	0	2918	0.815020906	ZN	Zinc	mg	0.001795041	0.001753149	46.19268294
WCANA	Afghanistan	AFG	1968	10466000	0	2918	0.815020906	THIA	Thiamin	mg	0.001627261	0.000776827	0.013153971
WCANA	Afghanistan	AFG	1968	10466000	0	2918	0.815020906	VITC	Vitamin C	mg	0.051613274	0.04946699	38.09928035
WCANA	Afghanistan	AFG	1969	10729000	0	2937	0.815169741	NIA	Niacin	mg	0.026021534	0.009394559	7.24E-11
WCANA	Afghanistan	AFG	1969	10729000	0	2937	0.815169741	CU	Copper	mcg	0.001965476	0.000564231	0.090116445
WCANA	Afghanistan	AFG	1969	10729000	0	2937	0.815169741	P	Phosphorus	mg	1.298961534	0.622101985	0.000674257
WCANA	Afghanistan	AFG	1969	10729000	0	2937	0.815169741	THIA	Thiamin	mg	0.001678924	0.00077624	0.005302744
WCANA	Afghanistan	AFG	1969	10729000	0	2937	0.815169741	CA	Calcium	mg	0.760292293	0.777621947	52.96081263
WCANA	Afghanistan	AFG	1969	10729000	0	2937	0.815169741	ZN	Zinc	mg	0.001785683	0.001751357	46.87554025
WCANA	Afghanistan	AFG	1969	10729000	0	2937	0.815169741	FE	Iron	mg	0.006153555	0.007141892	57.69106799
WCANA	Afghanistan	AFG	1969	10729000	0	2937	0.815169741	VITA_RAE	Vitamin A	mcg	0.000340246	0.000459768	68.66421259
WCANA	Afghanistan	AFG	1969	10729000	0	2937	0.815169741	FOL	Folate	mcg	0.000402403	0.000264823	4.166104017
WCANA	Afghanistan	AFG	1969	10729000	0	2937	0.815169741	RIBF	Riboflavin	mg	0.001343054	0.000821322	1.711084907
WCANA	Afghanistan	AFG	1969	10729000	0	2937	0.815169741	VITB6A	Vitamin B6	mg	0.002101306	0.000908392	7.49E-06
WCANA	Afghanistan	AFG	1969	10729000	0	2937	0.815169741	MG	Magnesium	mg	0.568977742	0.225208106	5.11E-08
WCANA	Afghanistan	AFG	1969	10729000	0	2937	0.815169741	VITC	Vitamin C	mg	0.051745202	0.04941043	37.73415593
WCANA	Afghanistan	AFG	1969	10729000	0	2937	0.815169741	VITB12	Vitamin B12	mcg	2.70E-06	1.59E-06	14.98376903
WCANA	Afghanistan	AFG	1970	11016000	0	2533	0.824391989	VITA_RAE	Vitamin A	mcg	0.000302583	0.000459508	77.58428736
WCANA	Afghanistan	AFG	1970	11016000	0	2533	0.824391989	THIA	Thiamin	mg	0.001409606	0.000775763	0.322949272
WCANA	Afghanistan	AFG	1970	11016000	0	2533	0.824391989	MG	Magnesium	mg	0.483860435	0.224971085	0.000208155
WCANA	Afghanistan	AFG	1970	11016000	0	2533	0.824391989	NIA	Niacin	mg	0.022479417	0.009388849	1.22E-06
WCANA	Afghanistan	AFG	1970	11016000	0	2533	0.824391989	ZN	Zinc	mg	0.001760605	0.001749959	49.0292965
WCANA	Afghanistan	AFG	1970	11016000	0	2533	0.824391989	RIBF	Riboflavin	mg	0.001163189	0.000820862	8.224747174
WCANA	Afghanistan	AFG	1970	11016000	0	2533	0.824391989	VITB12	Vitamin B12	mcg	2.42E-06	1.59E-06	17.19447617
WCANA	Afghanistan	AFG	1970	11016000	0	2533	0.824391989	FE	Iron	mg	0.00530943	0.007137369	71.74676031
WCANA	Afghanistan	AFG	1970	11016000	0	2533	0.824391989	VITC	Vitamin C	mg	0.046804327	0.049364349	47.83088649
WCANA	Afghanistan	AFG	1970	11016000	0	2533	0.824391989	P	Phosphorus	mg	1.116436506	0.622108805	0.074045073
WCANA	Afghanistan	AFG	1970	11016000	0	2533	0.824391989	FOL	Folate	mcg	0.000345518	0.000264678	15.43177427
WCANA	Afghanistan	AFG	1970	11016000	0	2533	0.824391989	CU	Copper	mcg	0.00170583	0.000563879	0.261494575
WCANA	Afghanistan	AFG	1970	11016000	0	2533	0.824391989	VITB6A	Vitamin B6	mg	0.001806014	0.000907787	0.003780951
WCANA	Afghanistan	AFG	1970	11016000	0	2533	0.824391989	CA	Calcium	mg	0.671701362	0.777296206	67.46643153
WCANA	Afghanistan	AFG	1971	11323000	0	2510	0.819888487	FOL	Folate	mcg	0.000351779	0.000264225	13.46782781
WCANA	Afghanistan	AFG	1971	11323000	0	2510	0.819888487	VITB12	Vitamin B12	mcg	2.31E-06	1.59E-06	18.17570111
WCANA	Afghanistan	AFG	1971	11323000	0	2510	0.819888487	CA	Calcium	mg	0.632275872	0.776196333	73.17316658
WCANA	Afghanistan	AFG	1971	11323000	0	2510	0.819888487	P	Phosphorus	mg	1.096327948	0.6215563	0.112390232
WCANA	Afghanistan	AFG	1971	11323000	0	2510	0.819888487	VITA_RAE	Vitamin A	mcg	0.000295408	0.000458684	79.10117949
WCANA	Afghanistan	AFG	1971	11323000	0	2510	0.819888487	CU	Copper	mcg	0.001677613	0.000562806	0.290679112
WCANA	Afghanistan	AFG	1971	11323000	0	2510	0.819888487	VITB6A	Vitamin B6	mg	0.001812611	0.000906036	0.003135424
WCANA	Afghanistan	AFG	1971	11323000	0	2510	0.819888487	FE	Iron	mg	0.005369995	0.007121654	70.54609219
WCANA	Afghanistan	AFG	1971	11323000	0	2510	0.819888487	VITC	Vitamin C	mg	0.043647269	0.049232566	54.77319297
WCANA	Afghanistan	AFG	1971	11323000	0	2510	0.819888487	THIA	Thiamin	mg	0.001440416	0.000774388	0.207258153
WCANA	Afghanistan	AFG	1971	11323000	0	2510	0.819888487	MG	Magnesium	mg	0.484677367	0.224335683	0.000172525
WCANA	Afghanistan	AFG	1971	11323000	0	2510	0.819888487	RIBF	Riboflavin	mg	0.001126402	0.000819403	10.58561801
WCANA	Afghanistan	AFG	1971	11323000	0	2510	0.819888487	NIA	Niacin	mg	0.022678139	0.009371854	6.76E-07
WCANA	Afghanistan	AFG	1971	11323000	0	2510	0.819888487	ZN	Zinc	mg	0.001734475	0.001745796	51.03477123
WCANA	Afghanistan	AFG	1972	11644000	0	2659	0.802022052	MG	Magnesium	mg	0.518170911	0.223932593	7.37E-06
WCANA	Afghanistan	AFG	1972	11644000	0	2659	0.802022052	NIA	Niacin	mg	0.023724329	0.009360754	4.18E-08
WCANA	Afghanistan	AFG	1972	11644000	0	2659	0.802022052	FE	Iron	mg	0.005588263	0.007111916	66.75666881
WCANA	Afghanistan	AFG	1972	11644000	0	2659	0.802022052	VITA_RAE	Vitamin A	mcg	0.000277634	0.000458127	82.93532929
WCANA	Afghanistan	AFG	1972	11644000	0	2659	0.802022052	VITB12	Vitamin B12	mcg	2.11E-06	1.58E-06	20.16859794
WCANA	Afghanistan	AFG	1972	11644000	0	2659	0.802022052	FOL	Folate	mcg	0.000372414	0.000263925	8.531270089
WCANA	Afghanistan	AFG	1972	11644000	0	2659	0.802022052	THIA	Thiamin	mg	0.001498874	0.000773469	0.088540386
WCANA	Afghanistan	AFG	1972	11644000	0	2659	0.802022052	CU	Copper	mcg	0.001781406	0.000562094	0.186071449
WCANA	Afghanistan	AFG	1972	11644000	0	2659	0.802022052	ZN	Zinc	mg	0.001695089	0.00174296	54.37409076
WCANA	Afghanistan	AFG	1972	11644000	0	2659	0.802022052	RIBF	Riboflavin	mg	0.001143177	0.000818439	9.29849282
WCANA	Afghanistan	AFG	1972	11644000	0	2659	0.802022052	CA	Calcium	mg	0.654542015	0.775684168	69.86709878
WCANA	Afghanistan	AFG	1972	11644000	0	2659	0.802022052	P	Phosphorus	mg	1.141326105	0.62158657	0.04120073
WCANA	Afghanistan	AFG	1972	11644000	0	2659	0.802022052	VITC	Vitamin C	mg	0.043743729	0.049138641	54.3496384
WCANA	Afghanistan	AFG	1972	11644000	0	2659	0.802022052	VITB6A	Vitamin B6	mg	0.001897351	0.000904773	0.000571501
WCANA	Afghanistan	AFG	1973	11966000	0	2721	0.803717268	FE	Iron	mg	0.005617493	0.007106979	66.19750647
WCANA	Afghanistan	AFG	1973	11966000	0	2721	0.803717268	FOL	Folate	mcg	0.000379114	0.000263754	7.242966763
WCANA	Afghanistan	AFG	1973	11966000	0	2721	0.803717268	VITB6A	Vitamin B6	mg	0.001929382	0.000903943	0.000284449
WCANA	Afghanistan	AFG	1973	11966000	0	2721	0.803717268	VITB12	Vitamin B12	mcg	2.22E-06	1.58E-06	19.01263723
WCANA	Afghanistan	AFG	1973	11966000	0	2721	0.803717268	CU	Copper	mcg	0.001821409	0.00056168	0.156694653
WCANA	Afghanistan	AFG	1973	11966000	0	2721	0.803717268	VITA_RAE	Vitamin A	mcg	0.000286058	0.000457797	81.06586547
WCANA	Afghanistan	AFG	1973	11966000	0	2721	0.803717268	VITC	Vitamin C	mg	0.045079887	0.049077269	51.1130309
WCANA	Afghanistan	AFG	1973	11966000	0	2721	0.803717268	NIA	Niacin	mg	0.024130722	0.009354453	1.32E-08
WCANA	Afghanistan	AFG	1973	11966000	0	2721	0.803717268	MG	Magnesium	mg	0.527316293	0.223714187	2.84E-06
WCANA	Afghanistan	AFG	1973	11966000	0	2721	0.803717268	CA	Calcium	mg	0.675934785	0.775616732	66.58195452
WCANA	Afghanistan	AFG	1973	11966000	0	2721	0.803717268	THIA	Thiamin	mg	0.001528275	0.000772925	0.056190991
WCANA	Afghanistan	AFG	1973	11966000	0	2721	0.803717268	P	Phosphorus	mg	1.173401721	0.622044147	0.019596704
WCANA	Afghanistan	AFG	1973	11966000	0	2721	0.803717268	ZN	Zinc	mg	0.001714965	0.001741252	52.40761404
WCANA	Afghanistan	AFG	1973	11966000	0	2721	0.803717268	RIBF	Riboflavin	mg	0.001180559	0.000817886	6.969199697
WCANA	Afghanistan	AFG	1974	12274000	0	2713	0.801908948	RIBF	Riboflavin	mg	0.001175565	0.000817682	7.229178649
WCANA	Afghanistan	AFG	1974	12274000	0	2713	0.801908948	THIA	Thiamin	mg	0.001514354	0.000772696	0.068847808
WCANA	Afghanistan	AFG	1974	12274000	0	2713	0.801908948	NIA	Niacin	mg	0.024004393	0.009352087	1.84E-08
WCANA	Afghanistan	AFG	1974	12274000	0	2713	0.801908948	P	Phosphorus	mg	1.167173267	0.622723514	0.023506997
WCANA	Afghanistan	AFG	1974	12274000	0	2713	0.801908948	ZN	Zinc	mg	0.001715009	0.001740523	52.33784595
WCANA	Afghanistan	AFG	1974	12274000	0	2713	0.801908948	VITB6A	Vitamin B6	mg	0.001915082	0.000903509	0.000375989
WCANA	Afghanistan	AFG	1974	12274000	0	2713	0.801908948	MG	Magnesium	mg	0.522261462	0.22364152	4.62E-06
WCANA	Afghanistan	AFG	1974	12274000	0	2713	0.801908948	FOL	Folate	mcg	0.000375545	0.00026369	7.868639546
WCANA	Afghanistan	AFG	1974	12274000	0	2713	0.801908948	FE	Iron	mg	0.005559861	0.00710576	67.15445452
WCANA	Afghanistan	AFG	1974	12274000	0	2713	0.801908948	CU	Copper	mcg	0.00179699	0.000561513	0.173031996
WCANA	Afghanistan	AFG	1974	12274000	0	2713	0.801908948	VITA_RAE	Vitamin A	mcg	0.000278799	0.000457662	82.62624333
WCANA	Afghanistan	AFG	1974	12274000	0	2713	0.801908948	VITC	Vitamin C	mg	0.04514423	0.04904546	50.89826368
WCANA	Afghanistan	AFG	1974	12274000	0	2713	0.801908948	VITB12	Vitamin B12	mcg	2.18E-06	1.58E-06	19.38952004
WCANA	Afghanistan	AFG	1974	12274000	0	2713	0.801908948	CA	Calcium	mg	0.676763919	0.775839561	66.48260784
WCANA	Afghanistan	AFG	1975	12552000	0	2755	0.796417561	MG	Magnesium	mg	0.526429001	0.223704893	3.10E-06
WCANA	Afghanistan	AFG	1975	12552000	0	2755	0.796417561	VITB6A	Vitamin B6	mg	0.001935056	0.000903493	0.000247379
WCANA	Afghanistan	AFG	1975	12552000	0	2755	0.796417561	P	Phosphorus	mg	1.176760346	0.623455966	0.019267562
WCANA	Afghanistan	AFG	1975	12552000	0	2755	0.796417561	CA	Calcium	mg	0.676888065	0.776254225	66.51977219
WCANA	Afghanistan	AFG	1975	12552000	0	2755	0.796417561	NIA	Niacin	mg	0.024317835	0.009353474	7.79E-09
WCANA	Afghanistan	AFG	1975	12552000	0	2755	0.796417561	RIBF	Riboflavin	mg	0.001187886	0.000817813	6.572800712
WCANA	Afghanistan	AFG	1975	12552000	0	2755	0.796417561	VITC	Vitamin C	mg	0.043250882	0.04904492	55.31807547
WCANA	Afghanistan	AFG	1975	12552000	0	2755	0.796417561	CU	Copper	mcg	0.001814972	0.000561585	0.160728962
WCANA	Afghanistan	AFG	1975	12552000	0	2755	0.796417561	THIA	Thiamin	mg	0.00153281	0.000772778	0.052207681
WCANA	Afghanistan	AFG	1975	12552000	0	2755	0.796417561	FOL	Folate	mcg	0.000379007	0.000263731	7.255875585
WCANA	Afghanistan	AFG	1975	12552000	0	2755	0.796417561	ZN	Zinc	mg	0.001720159	0.001740778	51.88944322
WCANA	Afghanistan	AFG	1975	12552000	0	2755	0.796417561	FE	Iron	mg	0.005603908	0.007107888	66.43908658
WCANA	Afghanistan	AFG	1975	12552000	0	2755	0.796417561	VITA_RAE	Vitamin A	mcg	0.000275543	0.000457722	83.32660953
WCANA	Afghanistan	AFG	1975	12552000	0	2755	0.796417561	VITB12	Vitamin B12	mcg	2.21E-06	1.58E-06	19.15870087
WCANA	Afghanistan	AFG	1976	12807000	0	2824	0.802581106	RIBF	Riboflavin	mg	0.001230295	0.000816612	4.564643475
WCANA	Afghanistan	AFG	1976	12807000	0	2824	0.802581106	VITB12	Vitamin B12	mcg	2.39E-06	1.58E-06	17.34437905
WCANA	Afghanistan	AFG	1976	12807000	0	2824	0.802581106	VITB6A	Vitamin B6	mg	0.002033515	0.00090198	2.61E-05
WCANA	Afghanistan	AFG	1976	12807000	0	2824	0.802581106	VITC	Vitamin C	mg	0.045756167	0.048933865	49.26823961
WCANA	Afghanistan	AFG	1976	12807000	0	2824	0.802581106	MG	Magnesium	mg	0.540311646	0.223184432	6.59E-07
WCANA	Afghanistan	AFG	1976	12807000	0	2824	0.802581106	ZN	Zinc	mg	0.001763319	0.001737412	47.62196041
WCANA	Afghanistan	AFG	1976	12807000	0	2824	0.802581106	THIA	Thiamin	mg	0.001573217	0.00077164	0.026744193
WCANA	Afghanistan	AFG	1976	12807000	0	2824	0.802581106	NIA	Niacin	mg	0.025268493	0.009339266	4.47E-10
WCANA	Afghanistan	AFG	1976	12807000	0	2824	0.802581106	CA	Calcium	mg	0.685661952	0.77537792	65.01357753
WCANA	Afghanistan	AFG	1976	12807000	0	2824	0.802581106	CU	Copper	mcg	0.001889124	0.000560676	0.116936744
WCANA	Afghanistan	AFG	1976	12807000	0	2824	0.802581106	VITA_RAE	Vitamin A	mcg	0.000286723	0.000457047	80.81497581
WCANA	Afghanistan	AFG	1976	12807000	0	2824	0.802581106	P	Phosphorus	mg	1.217259856	0.623145891	0.006846666
WCANA	Afghanistan	AFG	1976	12807000	0	2824	0.802581106	FE	Iron	mg	0.005802742	0.007094758	62.89883249
WCANA	Afghanistan	AFG	1976	12807000	0	2824	0.802581106	FOL	Folate	mcg	0.000390336	0.000263357	5.400705628
WCANA	Afghanistan	AFG	1977	13034000	0	2486	0.796003643	CA	Calcium	mg	0.616281903	0.774699978	75.22641433
WCANA	Afghanistan	AFG	1977	13034000	0	2486	0.796003643	FE	Iron	mg	0.005100879	0.007084452	74.53835639
WCANA	Afghanistan	AFG	1977	13034000	0	2486	0.796003643	FOL	Folate	mcg	0.000338421	0.000263052	16.9773636
WCANA	Afghanistan	AFG	1977	13034000	0	2486	0.796003643	P	Phosphorus	mg	1.07518888	0.623012478	0.184708261
WCANA	Afghanistan	AFG	1977	13034000	0	2486	0.796003643	RIBF	Riboflavin	mg	0.001089285	0.000815647	13.17226136
WCANA	Afghanistan	AFG	1977	13034000	0	2486	0.796003643	CU	Copper	mcg	0.001619723	0.000559935	0.359139636
WCANA	Afghanistan	AFG	1977	13034000	0	2486	0.796003643	VITB12	Vitamin B12	mcg	2.33E-06	1.58E-06	17.83640834
WCANA	Afghanistan	AFG	1977	13034000	0	2486	0.796003643	THIA	Thiamin	mg	0.001366603	0.000770714	0.497996344
WCANA	Afghanistan	AFG	1977	13034000	0	2486	0.796003643	NIA	Niacin	mg	0.021930337	0.009327791	3.25E-06
WCANA	Afghanistan	AFG	1977	13034000	0	2486	0.796003643	VITA_RAE	Vitamin A	mcg	0.000246769	0.000456503	88.83454501
WCANA	Afghanistan	AFG	1977	13034000	0	2486	0.796003643	MG	Magnesium	mg	0.472625418	0.222765557	0.000362
WCANA	Afghanistan	AFG	1977	13034000	0	2486	0.796003643	VITB6A	Vitamin B6	mg	0.001717769	0.000900682	0.014240084
WCANA	Afghanistan	AFG	1977	13034000	0	2486	0.796003643	VITC	Vitamin C	mg	0.029188049	0.048842182	87.36318419
WCANA	Afghanistan	AFG	1977	13034000	0	2486	0.796003643	ZN	Zinc	mg	0.001744676	0.001734688	49.0812265
WCANA	Afghanistan	AFG	1978	13200000	0	2619	0.802612696	RIBF	Riboflavin	mg	0.00114246	0.000815015	9.024937054
WCANA	Afghanistan	AFG	1978	13200000	0	2619	0.802612696	VITB6A	Vitamin B6	mg	0.001839743	0.000899711	0.001462311
WCANA	Afghanistan	AFG	1978	13200000	0	2619	0.802612696	FE	Iron	mg	0.005470633	0.007078021	68.29715956
WCANA	Afghanistan	AFG	1978	13200000	0	2619	0.802612696	P	Phosphorus	mg	1.123978624	0.623136404	0.065227605
WCANA	Afghanistan	AFG	1978	13200000	0	2619	0.802612696	VITA_RAE	Vitamin A	mcg	0.000271516	0.000456142	83.97388106
WCANA	Afghanistan	AFG	1978	13200000	0	2619	0.802612696	CA	Calcium	mg	0.633782489	0.774314632	72.74019745
WCANA	Afghanistan	AFG	1978	13200000	0	2619	0.802612696	VITB12	Vitamin B12	mcg	2.40E-06	1.58E-06	17.140337
WCANA	Afghanistan	AFG	1978	13200000	0	2619	0.802612696	THIA	Thiamin	mg	0.001476028	0.000770082	0.112261939
WCANA	Afghanistan	AFG	1978	13200000	0	2619	0.802612696	NIA	Niacin	mg	0.023314755	0.009320121	9.50E-08
WCANA	Afghanistan	AFG	1978	13200000	0	2619	0.802612696	CU	Copper	mcg	0.001722528	0.000559431	0.23009926
WCANA	Afghanistan	AFG	1978	13200000	0	2619	0.802612696	VITC	Vitamin C	mg	0.037916439	0.04877761	67.76704491
WCANA	Afghanistan	AFG	1978	13200000	0	2619	0.802612696	ZN	Zinc	mg	0.001756265	0.001732864	47.84604437
WCANA	Afghanistan	AFG	1978	13200000	0	2619	0.802612696	FOL	Folate	mcg	0.000361728	0.000262845	10.49196394
WCANA	Afghanistan	AFG	1978	13200000	0	2619	0.802612696	MG	Magnesium	mg	0.498963196	0.222486635	3.34E-05
WCANA	Afghanistan	AFG	1979	13257000	0	2621	0.801760853	THIA	Thiamin	mg	0.001432672	0.000769941	0.205765579
WCANA	Afghanistan	AFG	1979	13257000	0	2621	0.801760853	RIBF	Riboflavin	mg	0.00113214	0.000814921	9.722155448
WCANA	Afghanistan	AFG	1979	13257000	0	2621	0.801760853	VITA_RAE	Vitamin A	mcg	0.00027506	0.000456078	83.21913172
WCANA	Afghanistan	AFG	1979	13257000	0	2621	0.801760853	FOL	Folate	mcg	0.000359646	0.000262801	10.96539925
WCANA	Afghanistan	AFG	1979	13257000	0	2621	0.801760853	VITC	Vitamin C	mg	0.037971936	0.048757526	67.59232955
WCANA	Afghanistan	AFG	1979	13257000	0	2621	0.801760853	FE	Iron	mg	0.00535105	0.007077799	70.30913088
WCANA	Afghanistan	AFG	1979	13257000	0	2621	0.801760853	CA	Calcium	mg	0.640855856	0.774424569	71.73259321
WCANA	Afghanistan	AFG	1979	13257000	0	2621	0.801760853	CU	Copper	mcg	0.001711596	0.000559318	0.240648183
WCANA	Afghanistan	AFG	1979	13257000	0	2621	0.801760853	P	Phosphorus	mg	1.120575122	0.623663656	0.071866516
WCANA	Afghanistan	AFG	1979	13257000	0	2621	0.801760853	VITB12	Vitamin B12	mcg	2.41E-06	1.58E-06	17.04772466
WCANA	Afghanistan	AFG	1979	13257000	0	2621	0.801760853	MG	Magnesium	mg	0.495411153	0.222440691	4.59E-05
WCANA	Afghanistan	AFG	1979	13257000	0	2621	0.801760853	VITB6A	Vitamin B6	mg	0.001832112	0.000899293	0.001668758
WCANA	Afghanistan	AFG	1979	13257000	0	2621	0.801760853	NIA	Niacin	mg	0.02312004	0.009318733	1.57E-07
WCANA	Afghanistan	AFG	1979	13257000	0	2621	0.801760853	ZN	Zinc	mg	0.001764324	0.001732503	47.07168343
WCANA	Afghanistan	AFG	1980	13180000	0	2480	0.811818887	VITB12	Vitamin B12	mcg	2.46E-06	1.58E-06	16.67839418
WCANA	Afghanistan	AFG	1980	13180000	0	2480	0.811818887	ZN	Zinc	mg	0.001785168	0.001734224	45.32312308
WCANA	Afghanistan	AFG	1980	13180000	0	2480	0.811818887	CU	Copper	mcg	0.001670303	0.000559763	0.288503495
WCANA	Afghanistan	AFG	1980	13180000	0	2480	0.811818887	VITA_RAE	Vitamin A	mcg	0.00027611	0.000456434	83.04153374
WCANA	Afghanistan	AFG	1980	13180000	0	2480	0.811818887	VITC	Vitamin C	mg	0.037251636	0.048801536	69.44073853
WCANA	Afghanistan	AFG	1980	13180000	0	2480	0.811818887	VITB6A	Vitamin B6	mg	0.001746669	0.000899674	0.008301326
WCANA	Afghanistan	AFG	1980	13180000	0	2480	0.811818887	THIA	Thiamin	mg	0.001356149	0.000770504	0.564478938
WCANA	Afghanistan	AFG	1980	13180000	0	2480	0.811818887	CA	Calcium	mg	0.641140899	0.775224629	71.78739028
WCANA	Afghanistan	AFG	1980	13180000	0	2480	0.811818887	P	Phosphorus	mg	1.088457447	0.624704672	0.149180815
WCANA	Afghanistan	AFG	1980	13180000	0	2480	0.811818887	RIBF	Riboflavin	mg	0.001117757	0.000815587	10.84197033
WCANA	Afghanistan	AFG	1980	13180000	0	2480	0.811818887	FE	Iron	mg	0.005103683	0.007086301	74.51431249
WCANA	Afghanistan	AFG	1980	13180000	0	2480	0.811818887	FOL	Folate	mcg	0.000336846	0.000262986	17.45928856
WCANA	Afghanistan	AFG	1980	13180000	0	2480	0.811818887	MG	Magnesium	mg	0.469638661	0.222730509	0.000462065
WCANA	Afghanistan	AFG	1980	13180000	0	2480	0.811818887	NIA	Niacin	mg	0.021673104	0.009326322	5.94E-06
WCANA	Afghanistan	AFG	1981	12964000	0	2483	0.811742896	ZN	Zinc	mg	0.001804172	0.001730564	43.2451836
WCANA	Afghanistan	AFG	1981	12964000	0	2483	0.811742896	THIA	Thiamin	mg	0.001349607	0.000769237	0.595303731
WCANA	Afghanistan	AFG	1981	12964000	0	2483	0.811742896	MG	Magnesium	mg	0.466957985	0.222131831	0.000520051
WCANA	Afghanistan	AFG	1981	12964000	0	2483	0.811742896	CU	Copper	mcg	0.001645139	0.000558738	0.317161479
WCANA	Afghanistan	AFG	1981	12964000	0	2483	0.811742896	FOL	Folate	mcg	0.000333269	0.000262561	18.4683487
WCANA	Afghanistan	AFG	1981	12964000	0	2483	0.811742896	CA	Calcium	mg	0.650523506	0.774050852	70.2620344
WCANA	Afghanistan	AFG	1981	12964000	0	2483	0.811742896	VITC	Vitamin C	mg	0.036617005	0.048682279	70.76847626
WCANA	Afghanistan	AFG	1981	12964000	0	2483	0.811742896	NIA	Niacin	mg	0.021793015	0.00931034	4.09E-06
WCANA	Afghanistan	AFG	1981	12964000	0	2483	0.811742896	P	Phosphorus	mg	1.085901271	0.624079259	0.15380877
WCANA	Afghanistan	AFG	1981	12964000	0	2483	0.811742896	RIBF	Riboflavin	mg	0.001125516	0.000814255	10.12938024
WCANA	Afghanistan	AFG	1981	12964000	0	2483	0.811742896	VITB6A	Vitamin B6	mg	0.001743735	0.000897934	0.008235862
WCANA	Afghanistan	AFG	1981	12964000	0	2483	0.811742896	FE	Iron	mg	0.005094878	0.007070953	74.47751017
WCANA	Afghanistan	AFG	1981	12964000	0	2483	0.811742896	VITA_RAE	Vitamin A	mcg	0.000278453	0.000455697	82.44253933
WCANA	Afghanistan	AFG	1981	12964000	0	2483	0.811742896	VITB12	Vitamin B12	mcg	2.54E-06	1.57E-06	15.94345174
WCANA	Afghanistan	AFG	1982	12634000	0	2478	0.818322161	NIA	Niacin	mg	0.021638959	0.009298225	5.52E-06
WCANA	Afghanistan	AFG	1982	12634000	0	2478	0.818322161	THIA	Thiamin	mg	0.001342293	0.000768253	0.637501477
WCANA	Afghanistan	AFG	1982	12634000	0	2478	0.818322161	CA	Calcium	mg	0.661793576	0.773246578	68.45479715
WCANA	Afghanistan	AFG	1982	12634000	0	2478	0.818322161	FOL	Folate	mcg	0.000333505	0.000262226	18.24466359
WCANA	Afghanistan	AFG	1982	12634000	0	2478	0.818322161	ZN	Zinc	mg	0.001825703	0.001727699	41.02503797
WCANA	Afghanistan	AFG	1982	12634000	0	2478	0.818322161	CU	Copper	mcg	0.001643212	0.000557942	0.316593544
WCANA	Afghanistan	AFG	1982	12634000	0	2478	0.818322161	MG	Magnesium	mg	0.463276788	0.221682273	0.000652415
WCANA	Afghanistan	AFG	1982	12634000	0	2478	0.818322161	P	Phosphorus	mg	1.082841007	0.623905016	0.162868269
WCANA	Afghanistan	AFG	1982	12634000	0	2478	0.818322161	RIBF	Riboflavin	mg	0.001140303	0.000813243	9.003218891
WCANA	Afghanistan	AFG	1982	12634000	0	2478	0.818322161	VITC	Vitamin C	mg	0.038496232	0.048585163	65.96624089
WCANA	Afghanistan	AFG	1982	12634000	0	2478	0.818322161	VITA_RAE	Vitamin A	mcg	0.000297134	0.000455127	78.17851823
WCANA	Afghanistan	AFG	1982	12634000	0	2478	0.818322161	FE	Iron	mg	0.005101777	0.007060412	74.23969593
WCANA	Afghanistan	AFG	1982	12634000	0	2478	0.818322161	VITB6A	Vitamin B6	mg	0.001741219	0.000896353	0.008154679
WCANA	Afghanistan	AFG	1982	12634000	0	2478	0.818322161	VITB12	Vitamin B12	mcg	2.66E-06	1.57E-06	14.97321926
WCANA	Afghanistan	AFG	1983	12242000	0	2527	0.817658253	ZN	Zinc	mg	0.001832708	0.001725556	40.19165587
WCANA	Afghanistan	AFG	1983	12242000	0	2527	0.817658253	P	Phosphorus	mg	1.103092081	0.624183036	0.107377674
WCANA	Afghanistan	AFG	1983	12242000	0	2527	0.817658253	VITB6A	Vitamin B6	mg	0.001762466	0.000894899	0.005269481
WCANA	Afghanistan	AFG	1983	12242000	0	2527	0.817658253	VITC	Vitamin C	mg	0.038629656	0.048507608	65.48376024
WCANA	Afghanistan	AFG	1983	12242000	0	2527	0.817658253	VITA_RAE	Vitamin A	mcg	0.000305061	0.000454711	76.26318502
WCANA	Afghanistan	AFG	1983	12242000	0	2527	0.817658253	MG	Magnesium	mg	0.468673814	0.221365552	0.000393342
WCANA	Afghanistan	AFG	1983	12242000	0	2527	0.817658253	NIA	Niacin	mg	0.02178425	0.009289582	3.72E-06
WCANA	Afghanistan	AFG	1983	12242000	0	2527	0.817658253	FOL	Folate	mcg	0.000336392	0.000261973	17.18449176
WCANA	Afghanistan	AFG	1983	12242000	0	2527	0.817658253	THIA	Thiamin	mg	0.001357187	0.000767521	0.521988271
WCANA	Afghanistan	AFG	1983	12242000	0	2527	0.817658253	CA	Calcium	mg	0.695124369	0.772780332	63.11736916
WCANA	Afghanistan	AFG	1983	12242000	0	2527	0.817658253	RIBF	Riboflavin	mg	0.00116667	0.000812524	7.313067112
WCANA	Afghanistan	AFG	1983	12242000	0	2527	0.817658253	VITB12	Vitamin B12	mcg	2.71E-06	1.57E-06	14.60706077
WCANA	Afghanistan	AFG	1983	12242000	0	2527	0.817658253	FE	Iron	mg	0.005141065	0.007054583	73.52259754
WCANA	Afghanistan	AFG	1983	12242000	0	2527	0.817658253	CU	Copper	mcg	0.00165963	0.000557354	0.292843157
WCANA	Afghanistan	AFG	1984	11854000	0	2453	0.822884363	P	Phosphorus	mg	1.075530204	0.624648074	0.194299437
WCANA	Afghanistan	AFG	1984	11854000	0	2453	0.822884363	NIA	Niacin	mg	0.021081722	0.009280937	1.83E-05
WCANA	Afghanistan	AFG	1984	11854000	0	2453	0.822884363	VITB12	Vitamin B12	mcg	2.62E-06	1.57E-06	15.26568503
WCANA	Afghanistan	AFG	1984	11854000	0	2453	0.822884363	MG	Magnesium	mg	0.456050352	0.221047461	0.001056832
WCANA	Afghanistan	AFG	1984	11854000	0	2453	0.822884363	THIA	Thiamin	mg	0.001352767	0.000766782	0.542675555
WCANA	Afghanistan	AFG	1984	11854000	0	2453	0.822884363	ZN	Zinc	mg	0.001831017	0.001723414	40.13928231
WCANA	Afghanistan	AFG	1984	11854000	0	2453	0.822884363	VITB6A	Vitamin B6	mg	0.001720158	0.000893288	0.010670288
WCANA	Afghanistan	AFG	1984	11854000	0	2453	0.822884363	FE	Iron	mg	0.005134244	0.007050515	73.58637694
WCANA	Afghanistan	AFG	1984	11854000	0	2453	0.822884363	FOL	Folate	mcg	0.000325988	0.000261724	20.65422603
WCANA	Afghanistan	AFG	1984	11854000	0	2453	0.822884363	VITA_RAE	Vitamin A	mcg	0.000295455	0.0004543	78.44172543
WCANA	Afghanistan	AFG	1984	11854000	0	2453	0.822884363	RIBF	Riboflavin	mg	0.001144579	0.000811816	8.591734856
WCANA	Afghanistan	AFG	1984	11854000	0	2453	0.822884363	CU	Copper	mcg	0.001621343	0.000556763	0.342751945
WCANA	Afghanistan	AFG	1984	11854000	0	2453	0.822884363	CA	Calcium	mg	0.695446721	0.77231711	62.99699882
WCANA	Afghanistan	AFG	1984	11854000	0	2453	0.822884363	VITC	Vitamin C	mg	0.038562003	0.048427538	65.49340354
WCANA	Afghanistan	AFG	1985	11529000	0	2403	0.817303831	P	Phosphorus	mg	1.030757783	0.624789182	0.467375743
WCANA	Afghanistan	AFG	1985	11529000	0	2403	0.817303831	FE	Iron	mg	0.0049031	0.007042858	77.25874917
WCANA	Afghanistan	AFG	1985	11529000	0	2403	0.817303831	MG	Magnesium	mg	0.445717284	0.220495319	0.002196771
WCANA	Afghanistan	AFG	1985	11529000	0	2403	0.817303831	NIA	Niacin	mg	0.020689599	0.009266245	4.09E-05
WCANA	Afghanistan	AFG	1985	11529000	0	2403	0.817303831	VITB12	Vitamin B12	mcg	2.42E-06	1.57E-06	16.83772421
WCANA	Afghanistan	AFG	1985	11529000	0	2403	0.817303831	VITB6A	Vitamin B6	mg	0.001687535	0.000891036	0.017470855
WCANA	Afghanistan	AFG	1985	11529000	0	2403	0.817303831	VITA_RAE	Vitamin A	mcg	0.000282126	0.000453633	81.36091906
WCANA	Afghanistan	AFG	1985	11529000	0	2403	0.817303831	VITC	Vitamin C	mg	0.038984276	0.048307196	64.20516084
WCANA	Afghanistan	AFG	1985	11529000	0	2403	0.817303831	FOL	Folate	mcg	0.000322377	0.000261336	21.81150571
WCANA	Afghanistan	AFG	1985	11529000	0	2403	0.817303831	CU	Copper	mcg	0.001586762	0.000555803	0.39347153
WCANA	Afghanistan	AFG	1985	11529000	0	2403	0.817303831	CA	Calcium	mg	0.634972445	0.771253205	72.20698239
WCANA	Afghanistan	AFG	1985	11529000	0	2403	0.817303831	RIBF	Riboflavin	mg	0.001074374	0.000810628	13.90641106
WCANA	Afghanistan	AFG	1985	11529000	0	2403	0.817303831	ZN	Zinc	mg	0.001791501	0.001720029	43.39955347
WCANA	Afghanistan	AFG	1985	11529000	0	2403	0.817303831	THIA	Thiamin	mg	0.001294612	0.000765586	1.062927574
WCANA	Afghanistan	AFG	1986	11262000	0	2397	0.799555949	P	Phosphorus	mg	0.979907551	0.625109137	1.159428706
WCANA	Afghanistan	AFG	1986	11262000	0	2397	0.799555949	CA	Calcium	mg	0.556808031	0.771155655	82.29124132
WCANA	Afghanistan	AFG	1986	11262000	0	2397	0.799555949	MG	Magnesium	mg	0.437856632	0.220386694	0.003955818
WCANA	Afghanistan	AFG	1986	11262000	0	2397	0.799555949	VITA_RAE	Vitamin A	mcg	0.000243097	0.00045346	89.19786467
WCANA	Afghanistan	AFG	1986	11262000	0	2397	0.799555949	NIA	Niacin	mg	0.020391833	0.009262495	7.69E-05
WCANA	Afghanistan	AFG	1986	11262000	0	2397	0.799555949	FE	Iron	mg	0.004827565	0.007038707	78.41143781
WCANA	Afghanistan	AFG	1986	11262000	0	2397	0.799555949	CU	Copper	mcg	0.001567721	0.000555517	0.426044126
WCANA	Afghanistan	AFG	1986	11262000	0	2397	0.799555949	ZN	Zinc	mg	0.001752066	0.001719158	46.94834619
WCANA	Afghanistan	AFG	1986	11262000	0	2397	0.799555949	VITC	Vitamin C	mg	0.038005077	0.048270219	66.56713038
WCANA	Afghanistan	AFG	1986	11262000	0	2397	0.799555949	RIBF	Riboflavin	mg	0.000976291	0.000810339	24.7416647
WCANA	Afghanistan	AFG	1986	11262000	0	2397	0.799555949	THIA	Thiamin	mg	0.001261263	0.000765252	1.536477924
WCANA	Afghanistan	AFG	1986	11262000	0	2397	0.799555949	VITB12	Vitamin B12	mcg	2.11E-06	1.57E-06	19.88558633
WCANA	Afghanistan	AFG	1986	11262000	0	2397	0.799555949	FOL	Folate	mcg	0.000316874	0.000261207	23.87328141
WCANA	Afghanistan	AFG	1986	11262000	0	2397	0.799555949	VITB6A	Vitamin B6	mg	0.001655553	0.000890262	0.029247665
WCANA	Afghanistan	AFG	1987	11063000	0	2725	0.794132127	NIA	Niacin	mg	0.024490635	0.009268717	2.53E-09
WCANA	Afghanistan	AFG	1987	11063000	0	2725	0.794132127	VITB12	Vitamin B12	mcg	2.31E-06	1.57E-06	17.84871196
WCANA	Afghanistan	AFG	1987	11063000	0	2725	0.794132127	FOL	Folate	mcg	0.000385127	0.000261326	5.715122499
WCANA	Afghanistan	AFG	1987	11063000	0	2725	0.794132127	FE	Iron	mg	0.005745564	0.007045053	63.18018854
WCANA	Afghanistan	AFG	1987	11063000	0	2725	0.794132127	THIA	Thiamin	mg	0.001506613	0.000765671	0.062837686
WCANA	Afghanistan	AFG	1987	11063000	0	2725	0.794132127	MG	Magnesium	mg	0.514256488	0.220652664	5.12E-06
WCANA	Afghanistan	AFG	1987	11063000	0	2725	0.794132127	RIBF	Riboflavin	mg	0.001127384	0.000810876	9.661242042
WCANA	Afghanistan	AFG	1987	11063000	0	2725	0.794132127	P	Phosphorus	mg	1.115795677	0.626285174	0.088468785
WCANA	Afghanistan	AFG	1987	11063000	0	2725	0.794132127	ZN	Zinc	mg	0.001776809	0.001720417	44.7843165
WCANA	Afghanistan	AFG	1987	11063000	0	2725	0.794132127	CA	Calcium	mg	0.62759564	0.771984401	73.35065098
WCANA	Afghanistan	AFG	1987	11063000	0	2725	0.794132127	VITB6A	Vitamin B6	mg	0.001924063	0.000890273	0.000170185
WCANA	Afghanistan	AFG	1987	11063000	0	2725	0.794132127	CU	Copper	mcg	0.001796453	0.000555849	0.160715687
WCANA	Afghanistan	AFG	1987	11063000	0	2725	0.794132127	VITC	Vitamin C	mg	0.037360195	0.048297382	68.22051689
WCANA	Afghanistan	AFG	1987	11063000	0	2725	0.794132127	VITA_RAE	Vitamin A	mcg	0.000260949	0.00045373	85.84719008
WCANA	Afghanistan	AFG	1988	11013000	0	2519	0.808870367	VITA_RAE	Vitamin A	mcg	0.000273779	0.000454111	83.23932922
WCANA	Afghanistan	AFG	1988	11013000	0	2519	0.808870367	FE	Iron	mg	0.005266898	0.007055015	71.43328609
WCANA	Afghanistan	AFG	1988	11013000	0	2519	0.808870367	VITC	Vitamin C	mg	0.038656175	0.048340239	65.08666835
WCANA	Afghanistan	AFG	1988	11013000	0	2519	0.808870367	CU	Copper	mcg	0.001677517	0.000556339	0.267725129
WCANA	Afghanistan	AFG	1988	11013000	0	2519	0.808870367	CA	Calcium	mg	0.612416025	0.773039815	75.57218285
WCANA	Afghanistan	AFG	1988	11013000	0	2519	0.808870367	FOL	Folate	mcg	0.000348158	0.000261514	13.47140852
WCANA	Afghanistan	AFG	1988	11013000	0	2519	0.808870367	MG	Magnesium	mg	0.46488305	0.221003509	0.000507298
WCANA	Afghanistan	AFG	1988	11013000	0	2519	0.808870367	VITB12	Vitamin B12	mcg	2.45E-06	1.57E-06	16.6058136
WCANA	Afghanistan	AFG	1988	11013000	0	2519	0.808870367	RIBF	Riboflavin	mg	0.001090742	0.00081162	12.58238432
WCANA	Afghanistan	AFG	1988	11013000	0	2519	0.808870367	VITB6A	Vitamin B6	mg	0.001777314	0.000890476	0.003393157
WCANA	Afghanistan	AFG	1988	11013000	0	2519	0.808870367	NIA	Niacin	mg	0.022175078	0.009277384	1.34E-06
WCANA	Afghanistan	AFG	1988	11013000	0	2519	0.808870367	THIA	Thiamin	mg	0.001370304	0.000766276	0.430014189
WCANA	Afghanistan	AFG	1988	11013000	0	2519	0.808870367	P	Phosphorus	mg	1.050833432	0.627733207	0.350834343
WCANA	Afghanistan	AFG	1988	11013000	0	2519	0.808870367	ZN	Zinc	mg	0.001815705	0.001722211	41.40462388
WCANA	Afghanistan	AFG	1989	11215000	0	2461	0.806184391	RIBF	Riboflavin	mg	0.001063877	0.000811486	14.99273434
WCANA	Afghanistan	AFG	1989	11215000	0	2461	0.806184391	NIA	Niacin	mg	0.021319109	0.009275321	1.03E-05
WCANA	Afghanistan	AFG	1989	11215000	0	2461	0.806184391	ZN	Zinc	mg	0.001826597	0.001721735	40.37630118
WCANA	Afghanistan	AFG	1989	11215000	0	2461	0.806184391	MG	Magnesium	mg	0.441437921	0.220936078	0.003274009
WCANA	Afghanistan	AFG	1989	11215000	0	2461	0.806184391	VITA_RAE	Vitamin A	mcg	0.000267489	0.000454023	84.55036395
WCANA	Afghanistan	AFG	1989	11215000	0	2461	0.806184391	THIA	Thiamin	mg	0.001307343	0.000766077	0.925778692
WCANA	Afghanistan	AFG	1989	11215000	0	2461	0.806184391	VITB6A	Vitamin B6	mg	0.001685712	0.000889815	0.017324249
WCANA	Afghanistan	AFG	1989	11215000	0	2461	0.806184391	P	Phosphorus	mg	1.008935367	0.628388124	0.770980635
WCANA	Afghanistan	AFG	1989	11215000	0	2461	0.806184391	FOL	Folate	mcg	0.000330473	0.000261457	18.94567205
WCANA	Afghanistan	AFG	1989	11215000	0	2461	0.806184391	CU	Copper	mcg	0.001597052	0.000556182	0.378033878
WCANA	Afghanistan	AFG	1989	11215000	0	2461	0.806184391	VITC	Vitamin C	mg	0.036878564	0.048313931	69.44288332
WCANA	Afghanistan	AFG	1989	11215000	0	2461	0.806184391	VITB12	Vitamin B12	mcg	2.49E-06	1.57E-06	16.28268985
WCANA	Afghanistan	AFG	1989	11215000	0	2461	0.806184391	FE	Iron	mg	0.005047491	0.007056375	75.08083682
WCANA	Afghanistan	AFG	1989	11215000	0	2461	0.806184391	CA	Calcium	mg	0.593975194	0.77308018	78.00189008
WCANA	Afghanistan	AFG	1990	11731000	0	2315	0.832670944	FOL	Folate	mcg	0.000310023	0.000260865	26.49538385
WCANA	Afghanistan	AFG	1990	11731000	0	2315	0.832670944	NIA	Niacin	mg	0.020019465	0.009250261	0.000160564
WCANA	Afghanistan	AFG	1990	11731000	0	2315	0.832670944	P	Phosphorus	mg	1.014044175	0.626949719	0.676131712
WCANA	Afghanistan	AFG	1990	11731000	0	2315	0.832670944	ZN	Zinc	mg	0.001880375	0.00171643	35.12086715
WCANA	Afghanistan	AFG	1990	11731000	0	2315	0.832670944	VITB12	Vitamin B12	mcg	2.67E-06	1.56E-06	14.82349054
WCANA	Afghanistan	AFG	1990	11731000	0	2315	0.832670944	CU	Copper	mcg	0.001538631	0.00055464	0.478815818
WCANA	Afghanistan	AFG	1990	11731000	0	2315	0.832670944	MG	Magnesium	mg	0.421203316	0.219981886	0.012666355
WCANA	Afghanistan	AFG	1990	11731000	0	2315	0.832670944	RIBF	Riboflavin	mg	0.001109338	0.000809458	10.84330169
WCANA	Afghanistan	AFG	1990	11731000	0	2315	0.832670944	THIA	Thiamin	mg	0.001254615	0.000764171	1.620449971
WCANA	Afghanistan	AFG	1990	11731000	0	2315	0.832670944	VITC	Vitamin C	mg	0.039961102	0.048145104	61.44686243
WCANA	Afghanistan	AFG	1990	11731000	0	2315	0.832670944	CA	Calcium	mg	0.645910383	0.77105993	70.57559223
WCANA	Afghanistan	AFG	1990	11731000	0	2315	0.832670944	VITB6A	Vitamin B6	mg	0.001637803	0.000887641	0.036180622
WCANA	Afghanistan	AFG	1990	11731000	0	2315	0.832670944	FE	Iron	mg	0.004722662	0.007033307	79.98816769
WCANA	Afghanistan	AFG	1990	11731000	0	2315	0.832670944	VITA_RAE	Vitamin A	mcg	0.000293341	0.000452931	78.72423429
WCANA	Afghanistan	AFG	1991	12612000	0	2043	0.851835108	THIA	Thiamin	mg	0.001130659	0.000764624	5.52771855
WCANA	Afghanistan	AFG	1991	12612000	0	2043	0.851835108	RIBF	Riboflavin	mg	0.001031662	0.0008099	18.06959545
WCANA	Afghanistan	AFG	1991	12612000	0	2043	0.851835108	ZN	Zinc	mg	0.001868435	0.001717796	36.28788662
WCANA	Afghanistan	AFG	1991	12612000	0	2043	0.851835108	VITA_RAE	Vitamin A	mcg	0.000273206	0.000453184	83.24231265
WCANA	Afghanistan	AFG	1991	12612000	0	2043	0.851835108	P	Phosphorus	mg	0.919466829	0.626827988	3.092100766
WCANA	Afghanistan	AFG	1991	12612000	0	2043	0.851835108	NIA	Niacin	mg	0.017811929	0.009255562	0.010872642
WCANA	Afghanistan	AFG	1991	12612000	0	2043	0.851835108	MG	Magnesium	mg	0.373462083	0.220187185	0.26809524
WCANA	Afghanistan	AFG	1991	12612000	0	2043	0.851835108	VITB6A	Vitamin B6	mg	0.001475985	0.000888615	0.409690973
WCANA	Afghanistan	AFG	1991	12612000	0	2043	0.851835108	VITC	Vitamin C	mg	0.037203204	0.048191965	68.40779105
WCANA	Afghanistan	AFG	1991	12612000	0	2043	0.851835108	CU	Copper	mcg	0.001398534	0.000554986	0.896659616
WCANA	Afghanistan	AFG	1991	12612000	0	2043	0.851835108	VITB12	Vitamin B12	mcg	2.51E-06	1.56E-06	16.03489047
WCANA	Afghanistan	AFG	1991	12612000	0	2043	0.851835108	FOL	Folate	mcg	0.000278623	0.000261014	41.1034407
WCANA	Afghanistan	AFG	1991	12612000	0	2043	0.851835108	FE	Iron	mg	0.004251398	0.007036341	86.7615458
WCANA	Afghanistan	AFG	1991	12612000	0	2043	0.851835108	CA	Calcium	mg	0.615497277	0.771409405	74.97525037
WCANA	Afghanistan	AFG	1992	13812000	0	1890	0.854507603	NIA	Niacin	mg	0.016286277	0.00925776	0.119547551
WCANA	Afghanistan	AFG	1992	13812000	0	1890	0.854507603	MG	Magnesium	mg	0.337141986	0.220267805	1.690201697
WCANA	Afghanistan	AFG	1992	13812000	0	1890	0.854507603	CU	Copper	mcg	0.001288846	0.00055515	1.47737526
WCANA	Afghanistan	AFG	1992	13812000	0	1890	0.854507603	P	Phosphorus	mg	0.832289715	0.626398562	9.429506284
WCANA	Afghanistan	AFG	1992	13812000	0	1890	0.854507603	CA	Calcium	mg	0.586988144	0.771470473	78.73042677
WCANA	Afghanistan	AFG	1992	13812000	0	1890	0.854507603	ZN	Zinc	mg	0.001843224	0.001718452	38.57434994
WCANA	Afghanistan	AFG	1992	13812000	0	1890	0.854507603	RIBF	Riboflavin	mg	0.000939924	0.000810074	29.65615081
WCANA	Afghanistan	AFG	1992	13812000	0	1890	0.854507603	THIA	Thiamin	mg	0.001034227	0.000764845	12.01946383
WCANA	Afghanistan	AFG	1992	13812000	0	1890	0.854507603	FE	Iron	mg	0.003920275	0.007036433	90.75302314
WCANA	Afghanistan	AFG	1992	13812000	0	1890	0.854507603	FOL	Folate	mcg	0.000258505	0.000261092	51.31723735
WCANA	Afghanistan	AFG	1992	13812000	0	1890	0.854507603	VITB6A	Vitamin B6	mg	0.001354738	0.000889398	1.81822422
WCANA	Afghanistan	AFG	1992	13812000	0	1890	0.854507603	VITA_RAE	Vitamin A	mcg	0.000248571	0.000453292	88.1872537
WCANA	Afghanistan	AFG	1992	13812000	0	1890	0.854507603	VITB12	Vitamin B12	mcg	2.28E-06	1.56E-06	18.14817579
WCANA	Afghanistan	AFG	1992	13812000	0	1890	0.854507603	VITC	Vitamin C	mg	0.033648101	0.048219169	77.07456698
WCANA	Afghanistan	AFG	1993	15175000	0	1908	0.852581648	THIA	Thiamin	mg	0.001080997	0.000764652	8.394137753
WCANA	Afghanistan	AFG	1993	15175000	0	1908	0.852581648	VITC	Vitamin C	mg	0.031887253	0.048211172	81.06769533
WCANA	Afghanistan	AFG	1993	15175000	0	1908	0.852581648	VITB6A	Vitamin B6	mg	0.001387182	0.000889783	1.267430929
WCANA	Afghanistan	AFG	1993	15175000	0	1908	0.852581648	CA	Calcium	mg	0.588993236	0.771040235	78.4364634
WCANA	Afghanistan	AFG	1993	15175000	0	1908	0.852581648	VITB12	Vitamin B12	mcg	2.25E-06	1.56E-06	18.45995601
WCANA	Afghanistan	AFG	1993	15175000	0	1908	0.852581648	VITA_RAE	Vitamin A	mcg	0.000247097	0.000453159	88.44574174
WCANA	Afghanistan	AFG	1993	15175000	0	1908	0.852581648	ZN	Zinc	mg	0.001782732	0.001717924	44.00273678
WCANA	Afghanistan	AFG	1993	15175000	0	1908	0.852581648	P	Phosphorus	mg	0.868109071	0.62551333	6.041028164
WCANA	Afghanistan	AFG	1993	15175000	0	1908	0.852581648	RIBF	Riboflavin	mg	0.000959096	0.000809796	26.94226521
WCANA	Afghanistan	AFG	1993	15175000	0	1908	0.852581648	FE	Iron	mg	0.004034759	0.007030717	89.41441327
WCANA	Afghanistan	AFG	1993	15175000	0	1908	0.852581648	FOL	Folate	mcg	0.000271407	0.000261038	44.73266215
WCANA	Afghanistan	AFG	1993	15175000	0	1908	0.852581648	NIA	Niacin	mg	0.016950198	0.009254486	0.044009518
WCANA	Afghanistan	AFG	1993	15175000	0	1908	0.852581648	CU	Copper	mcg	0.001307474	0.000554982	1.354482793
WCANA	Afghanistan	AFG	1993	15175000	0	1908	0.852581648	MG	Magnesium	mg	0.357782234	0.220136052	0.619021611
WCANA	Afghanistan	AFG	1994	16485000	0	1821	0.864070815	CU	Copper	mcg	0.001249118	0.000554863	1.767185032
WCANA	Afghanistan	AFG	1994	16485000	0	1821	0.864070815	FOL	Folate	mcg	0.000258804	0.000261	51.11878496
WCANA	Afghanistan	AFG	1994	16485000	0	1821	0.864070815	THIA	Thiamin	mg	0.001029424	0.000764515	12.40406099
WCANA	Afghanistan	AFG	1994	16485000	0	1821	0.864070815	CA	Calcium	mg	0.601594837	0.770701492	76.77316873
WCANA	Afghanistan	AFG	1994	16485000	0	1821	0.864070815	VITA_RAE	Vitamin A	mcg	0.000251972	0.00045306	87.52494116
WCANA	Afghanistan	AFG	1994	16485000	0	1821	0.864070815	FE	Iron	mg	0.003809999	0.007024581	91.85501165
WCANA	Afghanistan	AFG	1994	16485000	0	1821	0.864070815	RIBF	Riboflavin	mg	0.000949488	0.000809582	28.22936371
WCANA	Afghanistan	AFG	1994	16485000	0	1821	0.864070815	VITB6A	Vitamin B6	mg	0.001321581	0.000890272	2.631924597
WCANA	Afghanistan	AFG	1994	16485000	0	1821	0.864070815	MG	Magnesium	mg	0.340917128	0.220032356	1.398946252
WCANA	Afghanistan	AFG	1994	16485000	0	1821	0.864070815	VITB12	Vitamin B12	mcg	2.30E-06	1.56E-06	17.95180098
WCANA	Afghanistan	AFG	1994	16485000	0	1821	0.864070815	VITC	Vitamin C	mg	0.03084672	0.048208683	83.30715056
WCANA	Afghanistan	AFG	1994	16485000	0	1821	0.864070815	P	Phosphorus	mg	0.851191071	0.624650668	7.343596989
WCANA	Afghanistan	AFG	1994	16485000	0	1821	0.864070815	NIA	Niacin	mg	0.015887872	0.009251987	0.205914576
WCANA	Afghanistan	AFG	1994	16485000	0	1821	0.864070815	ZN	Zinc	mg	0.001795721	0.001717556	42.77762817
WCANA	Afghanistan	AFG	1995	17586000	0	1844	0.849208119	FE	Iron	mg	0.003568056	0.007026209	94.13590971
WCANA	Afghanistan	AFG	1995	17586000	0	1844	0.849208119	VITB6A	Vitamin B6	mg	0.001269704	0.000891568	4.489545173
WCANA	Afghanistan	AFG	1995	17586000	0	1844	0.849208119	VITC	Vitamin C	mg	0.030200052	0.0482685	84.722104
WCANA	Afghanistan	AFG	1995	17586000	0	1844	0.849208119	CU	Copper	mcg	0.001184843	0.000555324	2.388292775
WCANA	Afghanistan	AFG	1995	17586000	0	1844	0.849208119	THIA	Thiamin	mg	0.000978069	0.000765092	17.67319649
WCANA	Afghanistan	AFG	1995	17586000	0	1844	0.849208119	CA	Calcium	mg	0.596550857	0.771249225	77.48890181
WCANA	Afghanistan	AFG	1995	17586000	0	1844	0.849208119	VITA_RAE	Vitamin A	mcg	0.000254477	0.000453378	87.07949168
WCANA	Afghanistan	AFG	1995	17586000	0	1844	0.849208119	ZN	Zinc	mg	0.001790443	0.001719202	43.41751015
WCANA	Afghanistan	AFG	1995	17586000	0	1844	0.849208119	FOL	Folate	mcg	0.000238039	0.000261187	61.61622642
WCANA	Afghanistan	AFG	1995	17586000	0	1844	0.849208119	MG	Magnesium	mg	0.325109018	0.22029039	2.850194437
WCANA	Afghanistan	AFG	1995	17586000	0	1844	0.849208119	NIA	Niacin	mg	0.015008498	0.009258964	0.649800967
WCANA	Afghanistan	AFG	1995	17586000	0	1844	0.849208119	P	Phosphorus	mg	0.826362933	0.624456319	9.794892694
WCANA	Afghanistan	AFG	1995	17586000	0	1844	0.849208119	VITB12	Vitamin B12	mcg	2.30E-06	1.56E-06	17.9690097
WCANA	Afghanistan	AFG	1995	17586000	0	1844	0.849208119	RIBF	Riboflavin	mg	0.000930131	0.000810145	31.07658295
WCANA	Afghanistan	AFG	1996	18415000	0	1841	0.862481697	P	Phosphorus	mg	0.830514802	0.622981018	9.134456391
WCANA	Afghanistan	AFG	1996	18415000	0	1841	0.862481697	FOL	Folate	mcg	0.000251597	0.000260648	54.60733709
WCANA	Afghanistan	AFG	1996	18415000	0	1841	0.862481697	NIA	Niacin	mg	0.015763576	0.009237837	0.235919069
WCANA	Afghanistan	AFG	1996	18415000	0	1841	0.862481697	MG	Magnesium	mg	0.327721058	0.21948711	2.427693544
WCANA	Afghanistan	AFG	1996	18415000	0	1841	0.862481697	CA	Calcium	mg	0.631166461	0.769554884	72.55571098
WCANA	Afghanistan	AFG	1996	18415000	0	1841	0.862481697	CU	Copper	mcg	0.001188809	0.000554027	2.314880666
WCANA	Afghanistan	AFG	1996	18415000	0	1841	0.862481697	VITB6A	Vitamin B6	mg	0.001297588	0.000889798	3.33879801
WCANA	Afghanistan	AFG	1996	18415000	0	1841	0.862481697	ZN	Zinc	mg	0.001824984	0.001714221	39.80273149
WCANA	Afghanistan	AFG	1996	18415000	0	1841	0.862481697	FE	Iron	mg	0.003746511	0.0070054	92.39146254
WCANA	Afghanistan	AFG	1996	18415000	0	1841	0.862481697	VITC	Vitamin C	mg	0.029542723	0.048120737	85.85327232
WCANA	Afghanistan	AFG	1996	18415000	0	1841	0.862481697	VITA_RAE	Vitamin A	mcg	0.000261634	0.00045237	85.55157245
WCANA	Afghanistan	AFG	1996	18415000	0	1841	0.862481697	RIBF	Riboflavin	mg	0.000974054	0.000808322	24.71640744
WCANA	Afghanistan	AFG	1996	18415000	0	1841	0.862481697	THIA	Thiamin	mg	0.001015092	0.000763443	13.59386459
WCANA	Afghanistan	AFG	1996	18415000	0	1841	0.862481697	VITB12	Vitamin B12	mcg	2.41E-06	1.56E-06	16.87650314
WCANA	Afghanistan	AFG	1997	19021000	0	1874	0.866442282	VITC	Vitamin C	mg	0.029466651	0.047969792	85.82046391
WCANA	Afghanistan	AFG	1997	19021000	0	1874	0.866442282	MG	Magnesium	mg	0.336213391	0.218688649	1.579237597
WCANA	Afghanistan	AFG	1997	19021000	0	1874	0.866442282	VITB12	Vitamin B12	mcg	2.52E-06	1.56E-06	15.87452761
WCANA	Afghanistan	AFG	1997	19021000	0	1874	0.866442282	VITA_RAE	Vitamin A	mcg	0.000267995	0.000451358	84.11588922
WCANA	Afghanistan	AFG	1997	19021000	0	1874	0.866442282	ZN	Zinc	mg	0.001870703	0.001709199	35.27288724
WCANA	Afghanistan	AFG	1997	19021000	0	1874	0.866442282	FOL	Folate	mcg	0.000257638	0.000260106	51.26170468
WCANA	Afghanistan	AFG	1997	19021000	0	1874	0.866442282	THIA	Thiamin	mg	0.001049154	0.000761783	10.42952851
WCANA	Afghanistan	AFG	1997	19021000	0	1874	0.866442282	CU	Copper	mcg	0.001225347	0.000552728	1.929038047
WCANA	Afghanistan	AFG	1997	19021000	0	1874	0.866442282	FE	Iron	mg	0.003882624	0.006984266	90.84766407
WCANA	Afghanistan	AFG	1997	19021000	0	1874	0.866442282	VITB6A	Vitamin B6	mg	0.001348437	0.000888002	1.903831323
WCANA	Afghanistan	AFG	1997	19021000	0	1874	0.866442282	NIA	Niacin	mg	0.01650928	0.009216757	0.077568732
WCANA	Afghanistan	AFG	1997	19021000	0	1874	0.866442282	P	Phosphorus	mg	0.86053309	0.62169018	6.217938741
WCANA	Afghanistan	AFG	1997	19021000	0	1874	0.866442282	CA	Calcium	mg	0.65596241	0.767969114	68.65730501
WCANA	Afghanistan	AFG	1997	19021000	0	1874	0.866442282	RIBF	Riboflavin	mg	0.001019488	0.000806503	18.93523641
WCANA	Afghanistan	AFG	1998	19497000	0	1901	0.866832968	MG	Magnesium	mg	0.33977905	0.218081969	1.280303193
WCANA	Afghanistan	AFG	1998	19497000	0	1901	0.866832968	VITB6A	Vitamin B6	mg	0.001362059	0.000886582	1.596800102
WCANA	Afghanistan	AFG	1998	19497000	0	1901	0.866832968	FE	Iron	mg	0.003931399	0.00696773	90.19728397
WCANA	Afghanistan	AFG	1998	19497000	0	1901	0.866832968	NIA	Niacin	mg	0.016680845	0.009200626	0.057288428
WCANA	Afghanistan	AFG	1998	19497000	0	1901	0.866832968	CU	Copper	mcg	0.00123816	0.000551729	1.799376072
WCANA	Afghanistan	AFG	1998	19497000	0	1901	0.866832968	VITC	Vitamin C	mg	0.028923551	0.047848399	86.73601035
WCANA	Afghanistan	AFG	1998	19497000	0	1901	0.866832968	ZN	Zinc	mg	0.00190415	0.001705224	32.03834096
WCANA	Afghanistan	AFG	1998	19497000	0	1901	0.866832968	P	Phosphorus	mg	0.878811782	0.62095574	4.83540256
WCANA	Afghanistan	AFG	1998	19497000	0	1901	0.866832968	CA	Calcium	mg	0.666388359	0.766922474	66.89294776
WCANA	Afghanistan	AFG	1998	19497000	0	1901	0.866832968	VITB12	Vitamin B12	mcg	2.67E-06	1.55E-06	14.71067068
WCANA	Afghanistan	AFG	1998	19497000	0	1901	0.866832968	FOL	Folate	mcg	0.000260953	0.000259684	49.35050134
WCANA	Afghanistan	AFG	1998	19497000	0	1901	0.866832968	RIBF	Riboflavin	mg	0.001042543	0.000805097	16.27799754
WCANA	Afghanistan	AFG	1998	19497000	0	1901	0.866832968	VITA_RAE	Vitamin A	mcg	0.000279655	0.000450564	81.48617662
WCANA	Afghanistan	AFG	1998	19497000	0	1901	0.866832968	THIA	Thiamin	mg	0.001057054	0.000760489	9.681924838
WCANA	Afghanistan	AFG	1999	19987000	0	1850	0.891028231	CU	Copper	mcg	0.001188203	0.000551062	2.253606159
WCANA	Afghanistan	AFG	1999	19987000	0	1850	0.891028231	MG	Magnesium	mg	0.328278777	0.217687773	2.107160617
WCANA	Afghanistan	AFG	1999	19987000	0	1850	0.891028231	P	Phosphorus	mg	0.861115823	0.620790246	6.074931285
WCANA	Afghanistan	AFG	1999	19987000	0	1850	0.891028231	ZN	Zinc	mg	0.001900689	0.001702455	32.06937641
WCANA	Afghanistan	AFG	1999	19987000	0	1850	0.891028231	VITC	Vitamin C	mg	0.029697213	0.047761199	85.1003072
WCANA	Afghanistan	AFG	1999	19987000	0	1850	0.891028231	FOL	Folate	mcg	0.000253707	0.000259398	52.91448438
WCANA	Afghanistan	AFG	1999	19987000	0	1850	0.891028231	FE	Iron	mg	0.005181204	0.006956621	71.64106681
WCANA	Afghanistan	AFG	1999	19987000	0	1850	0.891028231	VITA_RAE	Vitamin A	mcg	0.000284825	0.00045002	80.24714852
WCANA	Afghanistan	AFG	1999	19987000	0	1850	0.891028231	VITB12	Vitamin B12	mcg	2.68E-06	1.55E-06	14.60311399
WCANA	Afghanistan	AFG	1999	19987000	0	1850	0.891028231	RIBF	Riboflavin	mg	0.001058833	0.000804157	14.55601626
WCANA	Afghanistan	AFG	1999	19987000	0	1850	0.891028231	NIA	Niacin	mg	0.016137076	0.009189992	0.124826934
WCANA	Afghanistan	AFG	1999	19987000	0	1850	0.891028231	VITB6A	Vitamin B6	mg	0.001313807	0.00088558	2.654297404
WCANA	Afghanistan	AFG	1999	19987000	0	1850	0.891028231	CA	Calcium	mg	0.703283054	0.766426528	60.81970003
WCANA	Afghanistan	AFG	1999	19987000	0	1850	0.891028231	THIA	Thiamin	mg	0.00103549	0.000759607	11.30168078
WCANA	Afghanistan	AFG	2000	20595000	0	1789	0.86265963	NIA	Niacin	mg	0.015535684	0.009182175	0.28221706
WCANA	Afghanistan	AFG	2000	20595000	0	1789	0.86265963	CA	Calcium	mg	0.617040606	0.766186235	74.17874614
WCANA	Afghanistan	AFG	2000	20595000	0	1789	0.86265963	CU	Copper	mcg	0.001144443	0.000550564	2.751090368
WCANA	Afghanistan	AFG	2000	20595000	0	1789	0.86265963	VITB12	Vitamin B12	mcg	2.16E-06	1.55E-06	19.11938756
WCANA	Afghanistan	AFG	2000	20595000	0	1789	0.86265963	P	Phosphorus	mg	0.779812595	0.620924315	15.30216382
WCANA	Afghanistan	AFG	2000	20595000	0	1789	0.86265963	RIBF	Riboflavin	mg	0.000927178	0.000803466	30.38913703
WCANA	Afghanistan	AFG	2000	20595000	0	1789	0.86265963	MG	Magnesium	mg	0.314526748	0.217402885	3.697004669
WCANA	Afghanistan	AFG	2000	20595000	0	1789	0.86265963	FE	Iron	mg	0.003650311	0.006948578	93.03344923
WCANA	Afghanistan	AFG	2000	20595000	0	1789	0.86265963	FOL	Folate	mcg	0.000247199	0.000259183	56.12423486
WCANA	Afghanistan	AFG	2000	20595000	0	1789	0.86265963	THIA	Thiamin	mg	0.000994303	0.000758942	15.06323439
WCANA	Afghanistan	AFG	2000	20595000	0	1789	0.86265963	VITA_RAE	Vitamin A	mcg	0.000239348	0.000449613	89.49833319
WCANA	Afghanistan	AFG	2000	20595000	0	1789	0.86265963	ZN	Zinc	mg	0.001801762	0.00170036	40.57296314
WCANA	Afghanistan	AFG	2000	20595000	0	1789	0.86265963	VITB6A	Vitamin B6	mg	0.00127176	0.000884784	4.010482202
WCANA	Afghanistan	AFG	2000	20595000	0	1789	0.86265963	VITC	Vitamin C	mg	0.029746955	0.047692296	84.91170072
WCANA	Afghanistan	AFG	2001	21348000	0	1739	0.849337982	NIA	Niacin	mg	0.015209794	0.009174826	0.425546582
WCANA	Afghanistan	AFG	2001	21348000	0	1739	0.849337982	CU	Copper	mcg	0.001149079	0.000550085	2.679450792
WCANA	Afghanistan	AFG	2001	21348000	0	1739	0.849337982	RIBF	Riboflavin	mg	0.000803549	0.000802833	49.88126618
WCANA	Afghanistan	AFG	2001	21348000	0	1739	0.849337982	CA	Calcium	mg	0.514039722	0.76581056	86.34342538
WCANA	Afghanistan	AFG	2001	21348000	0	1739	0.849337982	VITA_RAE	Vitamin A	mcg	0.000205932	0.000449246	94.53946672
WCANA	Afghanistan	AFG	2001	21348000	0	1739	0.849337982	FE	Iron	mg	0.00362011	0.006941112	93.28112815
WCANA	Afghanistan	AFG	2001	21348000	0	1739	0.849337982	VITB12	Vitamin B12	mcg	1.67E-06	1.55E-06	25.53002367
WCANA	Afghanistan	AFG	2001	21348000	0	1739	0.849337982	THIA	Thiamin	mg	0.000976466	0.000758337	16.88289339
WCANA	Afghanistan	AFG	2001	21348000	0	1739	0.849337982	VITB6A	Vitamin B6	mg	0.001262364	0.000884005	4.344653534
WCANA	Afghanistan	AFG	2001	21348000	0	1739	0.849337982	FOL	Folate	mcg	0.000252827	0.000258977	53.15463909
WCANA	Afghanistan	AFG	2001	21348000	0	1739	0.849337982	P	Phosphorus	mg	0.719276842	0.620837709	26.29639829
WCANA	Afghanistan	AFG	2001	21348000	0	1739	0.849337982	MG	Magnesium	mg	0.310921912	0.217138813	4.202858524
WCANA	Afghanistan	AFG	2001	21348000	0	1739	0.849337982	ZN	Zinc	mg	0.00169667	0.00169856	50.1775577
WCANA	Afghanistan	AFG	2001	21348000	0	1739	0.849337982	VITC	Vitamin C	mg	0.032037793	0.047632667	79.86567669
WCANA	Afghanistan	AFG	2002	22203000	0	1825	0.85168444	THIA	Thiamin	mg	0.001010018	0.000758434	13.44251574
WCANA	Afghanistan	AFG	2002	22203000	0	1825	0.85168444	FOL	Folate	mcg	0.000247715	0.000258992	55.76994483
WCANA	Afghanistan	AFG	2002	22203000	0	1825	0.85168444	ZN	Zinc	mg	0.001723205	0.001698753	47.7042857
WCANA	Afghanistan	AFG	2002	22203000	0	1825	0.85168444	P	Phosphorus	mg	0.802169289	0.621424791	12.23295825
WCANA	Afghanistan	AFG	2002	22203000	0	1825	0.85168444	VITA_RAE	Vitamin A	mcg	0.000241482	0.000449291	89.08643268
WCANA	Afghanistan	AFG	2002	22203000	0	1825	0.85168444	VITB6A	Vitamin B6	mg	0.001292321	0.000883957	3.230914304
WCANA	Afghanistan	AFG	2002	22203000	0	1825	0.85168444	FE	Iron	mg	0.00361585	0.006942382	93.32694645
WCANA	Afghanistan	AFG	2002	22203000	0	1825	0.85168444	RIBF	Riboflavin	mg	0.000924248	0.000802963	30.73095895
WCANA	Afghanistan	AFG	2002	22203000	0	1825	0.85168444	MG	Magnesium	mg	0.32565483	0.217230829	2.294110141
WCANA	Afghanistan	AFG	2002	22203000	0	1825	0.85168444	NIA	Niacin	mg	0.0154831	0.009176755	0.299038023
WCANA	Afghanistan	AFG	2002	22203000	0	1825	0.85168444	CA	Calcium	mg	0.626349771	0.76625126	72.86042379
WCANA	Afghanistan	AFG	2002	22203000	0	1825	0.85168444	VITB12	Vitamin B12	mcg	2.02E-06	1.55E-06	20.65537737
WCANA	Afghanistan	AFG	2002	22203000	0	1825	0.85168444	VITC	Vitamin C	mg	0.028247551	0.047633895	87.77317792
WCANA	Afghanistan	AFG	2002	22203000	0	1825	0.85168444	CU	Copper	mcg	0.00115681	0.000550171	2.586382975
WCANA	Afghanistan	AFG	2003	23116000	0	1892	0.849652026	THIA	Thiamin	mg	0.001084692	0.000758989	7.629785073
WCANA	Afghanistan	AFG	2003	23116000	0	1892	0.849652026	VITA_RAE	Vitamin A	mcg	0.000237698	0.000449603	89.78737106
WCANA	Afghanistan	AFG	2003	23116000	0	1892	0.849652026	VITC	Vitamin C	mg	0.032360042	0.047674928	79.19359281
WCANA	Afghanistan	AFG	2003	23116000	0	1892	0.849652026	CU	Copper	mcg	0.001230671	0.00055063	1.841771192
WCANA	Afghanistan	AFG	2003	23116000	0	1892	0.849652026	CA	Calcium	mg	0.622012498	0.767216902	73.59374716
WCANA	Afghanistan	AFG	2003	23116000	0	1892	0.849652026	RIBF	Riboflavin	mg	0.000914717	0.000803588	32.24113133
WCANA	Afghanistan	AFG	2003	23116000	0	1892	0.849652026	NIA	Niacin	mg	0.016336643	0.009184717	0.092063726
WCANA	Afghanistan	AFG	2003	23116000	0	1892	0.849652026	P	Phosphorus	mg	0.804745576	0.622441903	12.0691183
WCANA	Afghanistan	AFG	2003	23116000	0	1892	0.849652026	VITB12	Vitamin B12	mcg	1.84E-06	1.55E-06	23.09678251
WCANA	Afghanistan	AFG	2003	23116000	0	1892	0.849652026	MG	Magnesium	mg	0.340199519	0.217551031	1.206430147
WCANA	Afghanistan	AFG	2003	23116000	0	1892	0.849652026	ZN	Zinc	mg	0.001712711	0.001700232	48.82901582
WCANA	Afghanistan	AFG	2003	23116000	0	1892	0.849652026	FE	Iron	mg	0.003915676	0.006949666	90.26050294
WCANA	Afghanistan	AFG	2003	23116000	0	1892	0.849652026	FOL	Folate	mcg	0.000263214	0.000259153	47.91725141
WCANA	Afghanistan	AFG	2003	23116000	0	1892	0.849652026	VITB6A	Vitamin B6	mg	0.001381207	0.0008844	1.232081448
WCANA	Afghanistan	AFG	2004	24019000	0	1965	0.823840539	THIA	Thiamin	mg	0.001065878	0.00075987	8.973749448
WCANA	Afghanistan	AFG	2004	24019000	0	1965	0.823840539	MG	Magnesium	mg	0.349485927	0.218024538	0.793559811
WCANA	Afghanistan	AFG	2004	24019000	0	1965	0.823840539	FE	Iron	mg	0.003890443	0.006961663	90.62141477
WCANA	Afghanistan	AFG	2004	24019000	0	1965	0.823840539	VITA_RAE	Vitamin A	mcg	0.000218681	0.000450107	92.8719344
WCANA	Afghanistan	AFG	2004	24019000	0	1965	0.823840539	ZN	Zinc	mg	0.001687117	0.001702634	51.45399036
WCANA	Afghanistan	AFG	2004	24019000	0	1965	0.823840539	P	Phosphorus	mg	0.819032397	0.623774673	10.52659472
WCANA	Afghanistan	AFG	2004	24019000	0	1965	0.823840539	RIBF	Riboflavin	mg	0.000912231	0.000804567	32.77798555
WCANA	Afghanistan	AFG	2004	24019000	0	1965	0.823840539	VITC	Vitamin C	mg	0.02641396	0.047744729	91.05198231
WCANA	Afghanistan	AFG	2004	24019000	0	1965	0.823840539	FOL	Folate	mcg	0.000259314	0.000259428	50.05835568
WCANA	Afghanistan	AFG	2004	24019000	0	1965	0.823840539	VITB6A	Vitamin B6	mg	0.001359792	0.000885236	1.600386862
WCANA	Afghanistan	AFG	2004	24019000	0	1965	0.823840539	NIA	Niacin	mg	0.016635468	0.009196913	0.06077031
WCANA	Afghanistan	AFG	2004	24019000	0	1965	0.823840539	CA	Calcium	mg	0.615636676	0.768551134	74.64036586
WCANA	Afghanistan	AFG	2004	24019000	0	1965	0.823840539	VITB12	Vitamin B12	mcg	1.85E-06	1.55E-06	22.91777682
WCANA	Afghanistan	AFG	2004	24019000	0	1965	0.823840539	CU	Copper	mcg	0.001229859	0.00055136	1.862737363
WCANA	Afghanistan	AFG	2005	24861000	0	1944	0.834038107	CU	Copper	mcg	0.00120747	0.000552378	2.088115146
WCANA	Afghanistan	AFG	2005	24861000	0	1944	0.834038107	THIA	Thiamin	mg	0.001016214	0.000761097	13.19284694
WCANA	Afghanistan	AFG	2005	24861000	0	1944	0.834038107	VITB6A	Vitamin B6	mg	0.001352811	0.000886538	1.769829032
WCANA	Afghanistan	AFG	2005	24861000	0	1944	0.834038107	CA	Calcium	mg	0.606675213	0.770251145	76.04932243
WCANA	Afghanistan	AFG	2005	24861000	0	1944	0.834038107	VITA_RAE	Vitamin A	mcg	0.000233635	0.000450824	90.59122119
WCANA	Afghanistan	AFG	2005	24861000	0	1944	0.834038107	FE	Iron	mg	0.003770243	0.006978804	92.00848081
WCANA	Afghanistan	AFG	2005	24861000	0	1944	0.834038107	P	Phosphorus	mg	0.779626017	0.625428343	16.20201318
WCANA	Afghanistan	AFG	2005	24861000	0	1944	0.834038107	VITB12	Vitamin B12	mcg	1.78E-06	1.56E-06	23.9572776
WCANA	Afghanistan	AFG	2005	24861000	0	1944	0.834038107	RIBF	Riboflavin	mg	0.00088169	0.000805928	37.70061642
WCANA	Afghanistan	AFG	2005	24861000	0	1944	0.834038107	FOL	Folate	mcg	0.000269564	0.000259829	45.03065677
WCANA	Afghanistan	AFG	2005	24861000	0	1944	0.834038107	NIA	Niacin	mg	0.016098973	0.00921351	0.13981331
WCANA	Afghanistan	AFG	2005	24861000	0	1944	0.834038107	MG	Magnesium	mg	0.335739262	0.218651754	1.609711406
WCANA	Afghanistan	AFG	2005	24861000	0	1944	0.834038107	ZN	Zinc	mg	0.00171098	0.001706066	49.54044202
WCANA	Afghanistan	AFG	2005	24861000	0	1944	0.834038107	VITC	Vitamin C	mg	0.030427746	0.047846335	83.70210497
WCANA	Afghanistan	AFG	2006	25631000	0	1964	0.820526692	RIBF	Riboflavin	mg	0.000854565	0.000806459	42.11957083
WCANA	Afghanistan	AFG	2006	25631000	0	1964	0.820526692	VITC	Vitamin C	mg	0.030679056	0.04787459	83.20932571
WCANA	Afghanistan	AFG	2006	25631000	0	1964	0.820526692	ZN	Zinc	mg	0.001650362	0.001706989	55.27826088
WCANA	Afghanistan	AFG	2006	25631000	0	1964	0.820526692	MG	Magnesium	mg	0.343797552	0.218924592	1.125736238
WCANA	Afghanistan	AFG	2006	25631000	0	1964	0.820526692	CU	Copper	mcg	0.001230902	0.000552844	1.882345577
WCANA	Afghanistan	AFG	2006	25631000	0	1964	0.820526692	FOL	Folate	mcg	0.000274608	0.000259988	42.56568816
WCANA	Afghanistan	AFG	2006	25631000	0	1964	0.820526692	VITB12	Vitamin B12	mcg	1.56E-06	1.56E-06	27.60891512
WCANA	Afghanistan	AFG	2006	25631000	0	1964	0.820526692	P	Phosphorus	mg	0.775860064	0.62672764	17.05950313
WCANA	Afghanistan	AFG	2006	25631000	0	1964	0.820526692	VITA_RAE	Vitamin A	mcg	0.000214111	0.000451068	93.58028828
WCANA	Afghanistan	AFG	2006	25631000	0	1964	0.820526692	THIA	Thiamin	mg	0.001060182	0.000761559	9.559519401
WCANA	Afghanistan	AFG	2006	25631000	0	1964	0.820526692	CA	Calcium	mg	0.589751976	0.771443475	78.37941929
WCANA	Afghanistan	AFG	2006	25631000	0	1964	0.820526692	VITB6A	Vitamin B6	mg	0.001366989	0.000887039	1.52213788
WCANA	Afghanistan	AFG	2006	25631000	0	1964	0.820526692	NIA	Niacin	mg	0.016229906	0.009220913	0.118101839
WCANA	Afghanistan	AFG	2006	25631000	0	1964	0.820526692	FE	Iron	mg	0.003859275	0.006987375	91.12102318
WCANA	Afghanistan	AFG	2007	26349000	0	2047	0.812950939	FOL	Folate	mcg	0.000293402	0.00026028	33.57185417
WCANA	Afghanistan	AFG	2007	26349000	0	2047	0.812950939	VITB6A	Vitamin B6	mg	0.001418802	0.000887968	0.839602481
WCANA	Afghanistan	AFG	2007	26349000	0	2047	0.812950939	FE	Iron	mg	0.004083093	0.007001476	88.6311731
WCANA	Afghanistan	AFG	2007	26349000	0	2047	0.812950939	MG	Magnesium	mg	0.362212224	0.219371372	0.459976822
WCANA	Afghanistan	AFG	2007	26349000	0	2047	0.812950939	P	Phosphorus	mg	0.803834994	0.628669137	13.25283908
WCANA	Afghanistan	AFG	2007	26349000	0	2047	0.812950939	VITC	Vitamin C	mg	0.028188937	0.047931594	88.20478618
WCANA	Afghanistan	AFG	2007	26349000	0	2047	0.812950939	VITA_RAE	Vitamin A	mcg	0.000216387	0.000451535	93.29665837
WCANA	Afghanistan	AFG	2007	26349000	0	2047	0.812950939	NIA	Niacin	mg	0.017113423	0.009233069	0.032011881
WCANA	Afghanistan	AFG	2007	26349000	0	2047	0.812950939	CA	Calcium	mg	0.615027346	0.773186425	75.23330017
WCANA	Afghanistan	AFG	2007	26349000	0	2047	0.812950939	RIBF	Riboflavin	mg	0.000890907	0.000807406	36.51493315
WCANA	Afghanistan	AFG	2007	26349000	0	2047	0.812950939	ZN	Zinc	mg	0.001643547	0.001708967	56.08492138
WCANA	Afghanistan	AFG	2007	26349000	0	2047	0.812950939	CU	Copper	mcg	0.001273593	0.00055361	1.558677245
WCANA	Afghanistan	AFG	2007	26349000	0	2047	0.812950939	VITB12	Vitamin B12	mcg	1.58E-06	1.56E-06	27.40388375
WCANA	Afghanistan	AFG	2007	26349000	0	2047	0.812950939	THIA	Thiamin	mg	0.001125365	0.000762379	5.62479429
WCANA	Afghanistan	AFG	2008	27032000	0	2038	0.813964274	VITB12	Vitamin B12	mcg	1.59E-06	1.56E-06	27.19901098
WCANA	Afghanistan	AFG	2008	27032000	0	2038	0.813964274	THIA	Thiamin	mg	0.001153755	0.00076364	4.429555258
WCANA	Afghanistan	AFG	2008	27032000	0	2038	0.813964274	VITA_RAE	Vitamin A	mcg	0.000207036	0.000452277	94.5748141
WCANA	Afghanistan	AFG	2008	27032000	0	2038	0.813964274	P	Phosphorus	mg	0.808026658	0.631207963	13.12482642
WCANA	Afghanistan	AFG	2008	27032000	0	2038	0.813964274	RIBF	Riboflavin	mg	0.000891511	0.000808849	36.66815763
WCANA	Afghanistan	AFG	2008	27032000	0	2038	0.813964274	MG	Magnesium	mg	0.36438545	0.220027959	0.434074975
WCANA	Afghanistan	AFG	2008	27032000	0	2038	0.813964274	VITB6A	Vitamin B6	mg	0.001417616	0.000889428	0.87647519
WCANA	Afghanistan	AFG	2008	27032000	0	2038	0.813964274	NIA	Niacin	mg	0.017324788	0.009250838	0.024049822
WCANA	Afghanistan	AFG	2008	27032000	0	2038	0.813964274	VITC	Vitamin C	mg	0.026970234	0.048025992	90.40726536
WCANA	Afghanistan	AFG	2008	27032000	0	2038	0.813964274	ZN	Zinc	mg	0.001666715	0.001712288	54.23910465
WCANA	Afghanistan	AFG	2008	27032000	0	2038	0.813964274	CA	Calcium	mg	0.609124676	0.77548672	76.27222273
WCANA	Afghanistan	AFG	2008	27032000	0	2038	0.813964274	CU	Copper	mcg	0.001288798	0.000554727	1.471081721
WCANA	Afghanistan	AFG	2008	27032000	0	2038	0.813964274	FE	Iron	mg	0.004245674	0.007021702	86.72060681
WCANA	Afghanistan	AFG	2008	27032000	0	2038	0.813964274	FOL	Folate	mcg	0.000296874	0.000260732	32.20155183
WCANA	Afghanistan	AFG	2009	27708000	0	2081	0.818829946	CA	Calcium	mg	0.620892049	0.778313595	74.99076948
WCANA	Afghanistan	AFG	2009	27708000	0	2081	0.818829946	CU	Copper	mcg	0.001315527	0.000556247	1.323584382
WCANA	Afghanistan	AFG	2009	27708000	0	2081	0.818829946	MG	Magnesium	mg	0.374717026	0.22093199	0.268219929
WCANA	Afghanistan	AFG	2009	27708000	0	2081	0.818829946	NIA	Niacin	mg	0.017831525	0.009275091	0.01120962
WCANA	Afghanistan	AFG	2009	27708000	0	2081	0.818829946	RIBF	Riboflavin	mg	0.000909703	0.000810861	34.22529945
WCANA	Afghanistan	AFG	2009	27708000	0	2081	0.818829946	THIA	Thiamin	mg	0.001134766	0.000765427	5.387155517
WCANA	Afghanistan	AFG	2009	27708000	0	2081	0.818829946	P	Phosphorus	mg	0.826946107	0.634211031	11.20706573
WCANA	Afghanistan	AFG	2009	27708000	0	2081	0.818829946	FE	Iron	mg	0.004289166	0.007048485	86.36155916
WCANA	Afghanistan	AFG	2009	27708000	0	2081	0.818829946	FOL	Folate	mcg	0.000318741	0.000261364	23.215586
WCANA	Afghanistan	AFG	2009	27708000	0	2081	0.818829946	VITA_RAE	Vitamin A	mcg	0.000224656	0.000453339	92.22257455
WCANA	Afghanistan	AFG	2009	27708000	0	2081	0.818829946	VITB12	Vitamin B12	mcg	1.67E-06	1.57E-06	25.91900952
WCANA	Afghanistan	AFG	2009	27708000	0	2081	0.818829946	ZN	Zinc	mg	0.001676748	0.001717228	53.75617037
WCANA	Afghanistan	AFG	2009	27708000	0	2081	0.818829946	VITC	Vitamin C	mg	0.029662057	0.048167252	85.67417146
WCANA	Afghanistan	AFG	2009	27708000	0	2081	0.818829946	VITB6A	Vitamin B6	mg	0.001464373	0.000891514	0.50809093
WCANA	Afghanistan	AFG	2010	28398000	0	2102	0.818714094	VITB6A	Vitamin B6	mg	0.001445489	0.000894211	0.683183673
WCANA	Afghanistan	AFG	2010	28398000	0	2102	0.818714094	VITB12	Vitamin B12	mcg	1.68E-06	1.57E-06	25.9679081
WCANA	Afghanistan	AFG	2010	28398000	0	2102	0.818714094	VITA_RAE	Vitamin A	mcg	0.000217365	0.000454707	93.37168234
WCANA	Afghanistan	AFG	2010	28398000	0	2102	0.818714094	FE	Iron	mg	0.004367154	0.007081099	85.58637825
WCANA	Afghanistan	AFG	2010	28398000	0	2102	0.818714094	CA	Calcium	mg	0.625100158	0.78152898	74.76750545
WCANA	Afghanistan	AFG	2010	28398000	0	2102	0.818714094	THIA	Thiamin	mg	0.0011669	0.000767728	4.15358629
WCANA	Afghanistan	AFG	2010	28398000	0	2102	0.818714094	RIBF	Riboflavin	mg	0.000922338	0.000813407	32.76552373
WCANA	Afghanistan	AFG	2010	28398000	0	2102	0.818714094	P	Phosphorus	mg	0.826722899	0.637444954	11.74701201
WCANA	Afghanistan	AFG	2010	28398000	0	2102	0.818714094	FOL	Folate	mcg	0.000310167	0.000262166	27.08250887
WCANA	Afghanistan	AFG	2010	28398000	0	2102	0.818714094	VITC	Vitamin C	mg	0.031215062	0.048356103	82.72842938
WCANA	Afghanistan	AFG	2010	28398000	0	2102	0.818714094	ZN	Zinc	mg	0.001682857	0.001723753	53.78029906
WCANA	Afghanistan	AFG	2010	28398000	0	2102	0.818714094	NIA	Niacin	mg	0.017880229	0.00930546	0.011394398
WCANA	Afghanistan	AFG	2010	28398000	0	2102	0.818714094	MG	Magnesium	mg	0.375230099	0.222071609	0.290138878
WCANA	Afghanistan	AFG	2010	28398000	0	2102	0.818714094	CU	Copper	mcg	0.001335287	0.000558145	1.235168637
WCANA	Afghanistan	AFG	2011	29105000	0	2106	0.814304806	CU	Copper	mcg	0.001361583	0.000560399	1.1243616
WCANA	Afghanistan	AFG	2011	29105000	1	2106	0.824585227	NIA	Niacin	mg	0.017912774	0.009341531	0.012119633
WCANA	Afghanistan	AFG	2011	29105000	0	2106	0.814304806	CA	Calcium	mg	0.618458828	0.78477454	76.00385969
WCANA	Afghanistan	AFG	2011	29105000	1	2106	0.824585227	MG	Magnesium	mg	0.377605313	0.22342377	0.288703787
WCANA	Afghanistan	AFG	2011	29105000	1	2106	0.824585227	CA	Calcium	mg	0.618458828	0.78477454	76.00385969
WCANA	Afghanistan	AFG	2011	29105000	1	2106	0.824585227	CU	Copper	mcg	0.001361583	0.000560399	1.1243616
WCANA	Afghanistan	AFG	2011	29105000	1	2106	0.824585227	FE	Iron	mg	0.005797702	0.00711888	63.31623095
WCANA	Afghanistan	AFG	2011	29105000	0	2106	0.814304806	VITB12	Vitamin B12	mcg	1.67E-06	1.58E-06	26.18322514
WCANA	Afghanistan	AFG	2011	29105000	0	2106	0.814304806	RIBF	Riboflavin	mg	0.000927819	0.00081644	32.46494843
WCANA	Afghanistan	AFG	2011	29105000	0	2106	0.814304806	THIA	Thiamin	mg	0.001198068	0.000770535	3.219206691
WCANA	Afghanistan	AFG	2011	29105000	0	2106	0.814304806	FOL	Folate	mcg	0.00031375	0.000263117	26.06109466
WCANA	Afghanistan	AFG	2011	29105000	1	2106	0.824585227	P	Phosphorus	mg	0.832189754	0.640257357	11.52454458
WCANA	Afghanistan	AFG	2011	29105000	0	2106	0.814304806	FE	Iron	mg	0.004495862	0.00711888	84.1426214
WCANA	Afghanistan	AFG	2011	29105000	0	2106	0.814304806	P	Phosphorus	mg	0.832189754	0.640257357	11.52454458
WCANA	Afghanistan	AFG	2011	29105000	1	2106	0.824585227	ZN	Zinc	mg	0.001692745	0.001731869	53.59999934
WCANA	Afghanistan	AFG	2011	29105000	0	2106	0.814304806	MG	Magnesium	mg	0.377605313	0.22342377	0.288703787
WCANA	Afghanistan	AFG	2011	29105000	0	2106	0.814304806	NIA	Niacin	mg	0.017912774	0.009341531	0.012119633
WCANA	Afghanistan	AFG	2011	29105000	1	2106	0.824585227	THIA	Thiamin	mg	0.001198068	0.000770535	3.219206691
WCANA	Afghanistan	AFG	2011	29105000	1	2106	0.824585227	VITA_RAE	Vitamin A	mcg	0.000207412	0.000456367	94.75658425
WCANA	Afghanistan	AFG	2011	29105000	1	2106	0.824585227	FOL	Folate	mcg	0.00031375	0.000263117	26.06109466
WCANA	Afghanistan	AFG	2011	29105000	1	2106	0.824585227	RIBF	Riboflavin	mg	0.000927819	0.00081644	32.46494843
WCANA	Afghanistan	AFG	2011	29105000	1	2106	0.824585227	VITC	Vitamin C	mg	0.028344407	0.048600002	88.62755567
WCANA	Afghanistan	AFG	2011	29105000	0	2106	0.814304806	ZN	Zinc	mg	0.001692745	0.001731869	53.59999934
WCANA	Afghanistan	AFG	2011	29105000	0	2106	0.814304806	VITB6A	Vitamin B6	mg	0.001440633	0.000897505	0.774713359
WCANA	Afghanistan	AFG	2011	29105000	1	2106	0.824585227	VITB6A	Vitamin B6	mg	0.001440633	0.000897505	0.774713359
WCANA	Afghanistan	AFG	2011	29105000	0	2106	0.814304806	VITA_RAE	Vitamin A	mcg	0.000207412	0.000456367	94.75658425
WCANA	Afghanistan	AFG	2011	29105000	1	2106	0.824585227	VITB12	Vitamin B12	mcg	1.67E-06	1.58E-06	26.18322514
WCANA	Afghanistan	AFG	2011	29105000	0	2106	0.814304806	VITC	Vitamin C	mg	0.028344407	0.048600002	88.62755567
Subsaharan Africa	Angola	AGO	1961	5057000	0	1794	0.800671944	CU	Copper	mcg	0.001114302	0.000564688	3.612336245
Subsaharan Africa	Angola	AGO	1961	5057000	0	1794	0.800671944	RIBF	Riboflavin	mg	0.000663378	0.000819642	73.74481509
Subsaharan Africa	Angola	AGO	1961	5057000	0	1794	0.800671944	THIA	Thiamin	mg	0.000706724	0.000776095	61.71292003
Subsaharan Africa	Angola	AGO	1961	5057000	0	1794	0.800671944	P	Phosphorus	mg	0.794344434	0.613310513	11.88609729
Subsaharan Africa	Angola	AGO	1961	5057000	0	1794	0.800671944	FOL	Folate	mcg	0.000241579	0.000264975	61.57443379
Subsaharan Africa	Angola	AGO	1961	5057000	0	1794	0.800671944	FE	Iron	mg	0.00338532	0.007140422	95.94728919
Subsaharan Africa	Angola	AGO	1961	5057000	0	1794	0.800671944	CA	Calcium	mg	0.528980627	0.775063473	85.50484384
Subsaharan Africa	Angola	AGO	1961	5057000	0	1794	0.800671944	NIA	Niacin	mg	0.008695651	0.009388669	61.61012088
Subsaharan Africa	Angola	AGO	1961	5057000	0	1794	0.800671944	VITA_RAE	Vitamin A	mcg	0.000187979	0.000458841	96.87947438
Subsaharan Africa	Angola	AGO	1961	5057000	0	1794	0.800671944	VITB12	Vitamin B12	mcg	8.78E-07	1.59E-06	46.42796206
Subsaharan Africa	Angola	AGO	1961	5057000	0	1794	0.800671944	ZN	Zinc	mg	0.0014903	0.001746565	72.13642277
Subsaharan Africa	Angola	AGO	1961	5057000	0	1794	0.800671944	VITB6A	Vitamin B6	mg	0.001201233	0.000912585	10.2902639
Subsaharan Africa	Angola	AGO	1961	5057000	0	1794	0.800671944	MG	Magnesium	mg	0.338698137	0.224715064	2.123244758
Subsaharan Africa	Angola	AGO	1961	5057000	0	1794	0.800671944	VITC	Vitamin C	mg	0.133583388	0.049468467	0.279279744
Subsaharan Africa	Angola	AGO	1962	5150000	0	1814	0.816122186	VITC	Vitamin C	mg	0.130183863	0.049324316	0.334565821
Subsaharan Africa	Angola	AGO	1962	5150000	0	1814	0.816122186	VITB12	Vitamin B12	mcg	1.14E-06	1.59E-06	37.76024105
Subsaharan Africa	Angola	AGO	1962	5150000	0	1814	0.816122186	VITB6A	Vitamin B6	mg	0.001220481	0.000910721	8.683551072
Subsaharan Africa	Angola	AGO	1962	5150000	0	1814	0.816122186	CU	Copper	mcg	0.001144001	0.000563618	3.121482636
Subsaharan Africa	Angola	AGO	1962	5150000	0	1814	0.816122186	ZN	Zinc	mg	0.001507415	0.001742189	70.50675871
Subsaharan Africa	Angola	AGO	1962	5150000	0	1814	0.816122186	FE	Iron	mg	0.003447921	0.007124044	95.45893198
Subsaharan Africa	Angola	AGO	1962	5150000	0	1814	0.816122186	VITA_RAE	Vitamin A	mcg	0.000191225	0.000457999	96.55616787
Subsaharan Africa	Angola	AGO	1962	5150000	0	1814	0.816122186	P	Phosphorus	mg	0.801530972	0.613509809	11.01233756
Subsaharan Africa	Angola	AGO	1962	5150000	0	1814	0.816122186	THIA	Thiamin	mg	0.000722906	0.000774655	58.81061186
Subsaharan Africa	Angola	AGO	1962	5150000	0	1814	0.816122186	CA	Calcium	mg	0.527982776	0.774428218	85.56011916
Subsaharan Africa	Angola	AGO	1962	5150000	0	1814	0.816122186	MG	Magnesium	mg	0.342889645	0.224089674	1.697861821
Subsaharan Africa	Angola	AGO	1962	5150000	0	1814	0.816122186	RIBF	Riboflavin	mg	0.000670868	0.00081821	72.58344515
Subsaharan Africa	Angola	AGO	1962	5150000	0	1814	0.816122186	FOL	Folate	mcg	0.000246797	0.000264502	58.82803921
Subsaharan Africa	Angola	AGO	1962	5150000	0	1814	0.816122186	NIA	Niacin	mg	0.009151426	0.009371963	53.74954719
Subsaharan Africa	Angola	AGO	1963	5245000	0	1848	0.81943623	VITB12	Vitamin B12	mcg	1.14E-06	1.59E-06	37.68977825
Subsaharan Africa	Angola	AGO	1963	5245000	0	1848	0.81943623	FE	Iron	mg	0.003588128	0.00711282	94.33490791
Subsaharan Africa	Angola	AGO	1963	5245000	0	1848	0.81943623	FOL	Folate	mcg	0.00025663	0.000264168	53.78865768
Subsaharan Africa	Angola	AGO	1963	5245000	0	1848	0.81943623	VITA_RAE	Vitamin A	mcg	0.000187415	0.000457401	96.87725791
Subsaharan Africa	Angola	AGO	1963	5245000	0	1848	0.81943623	CA	Calcium	mg	0.556674516	0.774196908	82.55051339
Subsaharan Africa	Angola	AGO	1963	5245000	0	1848	0.81943623	MG	Magnesium	mg	0.344010953	0.223630793	1.565168936
Subsaharan Africa	Angola	AGO	1963	5245000	0	1848	0.81943623	CU	Copper	mcg	0.001170214	0.000562849	2.748146676
Subsaharan Africa	Angola	AGO	1963	5245000	0	1848	0.81943623	VITB6A	Vitamin B6	mg	0.001279859	0.000909353	5.157629846
Subsaharan Africa	Angola	AGO	1963	5245000	0	1848	0.81943623	NIA	Niacin	mg	0.009385237	0.009359937	49.56867833
Subsaharan Africa	Angola	AGO	1963	5245000	0	1848	0.81943623	THIA	Thiamin	mg	0.000734117	0.00077359	56.75283887
Subsaharan Africa	Angola	AGO	1963	5245000	0	1848	0.81943623	ZN	Zinc	mg	0.001549155	0.001739023	66.88437127
Subsaharan Africa	Angola	AGO	1963	5245000	0	1848	0.81943623	P	Phosphorus	mg	0.807046474	0.614138219	10.44767109
Subsaharan Africa	Angola	AGO	1963	5245000	0	1848	0.81943623	VITC	Vitamin C	mg	0.137866536	0.049214511	0.20755422
Subsaharan Africa	Angola	AGO	1963	5245000	0	1848	0.81943623	RIBF	Riboflavin	mg	0.000694149	0.000817212	69.21529467
Subsaharan Africa	Angola	AGO	1964	5340000	0	1859	0.848443787	CU	Copper	mcg	0.001203526	0.000562439	2.350381452
Subsaharan Africa	Angola	AGO	1964	5340000	0	1859	0.848443787	FOL	Folate	mcg	0.000273884	0.000264001	45.03475065
Subsaharan Africa	Angola	AGO	1964	5340000	0	1859	0.848443787	VITB12	Vitamin B12	mcg	1.55E-06	1.58E-06	28.36021312
Subsaharan Africa	Angola	AGO	1964	5340000	0	1859	0.848443787	VITC	Vitamin C	mg	0.136119288	0.049148308	0.227816635
Subsaharan Africa	Angola	AGO	1964	5340000	0	1859	0.848443787	ZN	Zinc	mg	0.001575949	0.001737317	64.48802056
Subsaharan Africa	Angola	AGO	1964	5340000	0	1859	0.848443787	NIA	Niacin	mg	0.009719402	0.009353553	43.7837845
Subsaharan Africa	Angola	AGO	1964	5340000	0	1859	0.848443787	FE	Iron	mg	0.00374041	0.007107589	92.97223699
Subsaharan Africa	Angola	AGO	1964	5340000	0	1859	0.848443787	MG	Magnesium	mg	0.356451966	0.223383382	0.859113772
Subsaharan Africa	Angola	AGO	1964	5340000	0	1859	0.848443787	VITA_RAE	Vitamin A	mcg	0.000197013	0.00045709	95.9521451
Subsaharan Africa	Angola	AGO	1964	5340000	0	1859	0.848443787	CA	Calcium	mg	0.557360934	0.774361786	82.48754527
Subsaharan Africa	Angola	AGO	1964	5340000	0	1859	0.848443787	VITB6A	Vitamin B6	mg	0.001331059	0.000908592	3.145166789
Subsaharan Africa	Angola	AGO	1964	5340000	0	1859	0.848443787	THIA	Thiamin	mg	0.000767734	0.000772995	50.90498482
Subsaharan Africa	Angola	AGO	1964	5340000	0	1859	0.848443787	P	Phosphorus	mg	0.84032383	0.615070601	7.147499024
Subsaharan Africa	Angola	AGO	1964	5340000	0	1859	0.848443787	RIBF	Riboflavin	mg	0.000718029	0.000816712	65.64392141
Subsaharan Africa	Angola	AGO	1965	5434000	0	1873	0.837306792	RIBF	Riboflavin	mg	0.000709036	0.000816599	66.96945017
Subsaharan Africa	Angola	AGO	1965	5434000	0	1873	0.837306792	THIA	Thiamin	mg	0.000735337	0.000772802	56.41878656
Subsaharan Africa	Angola	AGO	1965	5434000	0	1873	0.837306792	VITA_RAE	Vitamin A	mcg	0.000194161	0.00045701	96.2356309
Subsaharan Africa	Angola	AGO	1965	5434000	0	1873	0.837306792	NIA	Niacin	mg	0.009792528	0.009351666	42.52148762
Subsaharan Africa	Angola	AGO	1965	5434000	0	1873	0.837306792	P	Phosphorus	mg	0.81252852	0.615993826	10.09402762
Subsaharan Africa	Angola	AGO	1965	5434000	0	1873	0.837306792	FOL	Folate	mcg	0.000249695	0.000263971	57.15279166
Subsaharan Africa	Angola	AGO	1965	5434000	0	1873	0.837306792	MG	Magnesium	mg	0.341903463	0.22331188	1.6825358
Subsaharan Africa	Angola	AGO	1965	5434000	0	1873	0.837306792	ZN	Zinc	mg	0.001579478	0.001736838	64.1475198
Subsaharan Africa	Angola	AGO	1965	5434000	0	1873	0.837306792	VITC	Vitamin C	mg	0.141529126	0.049120832	0.164397807
Subsaharan Africa	Angola	AGO	1965	5434000	0	1873	0.837306792	CU	Copper	mcg	0.001163471	0.000562315	2.820072548
Subsaharan Africa	Angola	AGO	1965	5434000	0	1873	0.837306792	FE	Iron	mg	0.003638888	0.007106955	93.88173418
Subsaharan Africa	Angola	AGO	1965	5434000	0	1873	0.837306792	VITB12	Vitamin B12	mcg	1.58E-06	1.58E-06	27.83382824
Subsaharan Africa	Angola	AGO	1965	5434000	0	1873	0.837306792	VITB6A	Vitamin B6	mg	0.001331379	0.000908353	3.124341071
Subsaharan Africa	Angola	AGO	1965	5434000	0	1873	0.837306792	CA	Calcium	mg	0.558525655	0.774715867	82.38640034
Subsaharan Africa	Angola	AGO	1966	5527000	0	1889	0.852443698	CU	Copper	mcg	0.001175863	0.000561106	2.633570231
Subsaharan Africa	Angola	AGO	1966	5527000	0	1889	0.852443698	MG	Magnesium	mg	0.345862865	0.222634009	1.341381375
Subsaharan Africa	Angola	AGO	1966	5527000	0	1889	0.852443698	NIA	Niacin	mg	0.009865774	0.009332843	40.96633484
Subsaharan Africa	Angola	AGO	1966	5527000	0	1889	0.852443698	P	Phosphorus	mg	0.824188389	0.616116568	8.837012703
Subsaharan Africa	Angola	AGO	1966	5527000	0	1889	0.852443698	RIBF	Riboflavin	mg	0.000725764	0.000815	64.2434075
Subsaharan Africa	Angola	AGO	1966	5527000	0	1889	0.852443698	ZN	Zinc	mg	0.001604397	0.001732218	61.60646917
Subsaharan Africa	Angola	AGO	1966	5527000	0	1889	0.852443698	CA	Calcium	mg	0.567942171	0.77389914	81.24865302
Subsaharan Africa	Angola	AGO	1966	5527000	0	1889	0.852443698	THIA	Thiamin	mg	0.000744585	0.000771258	54.58881578
Subsaharan Africa	Angola	AGO	1966	5527000	0	1889	0.852443698	FE	Iron	mg	0.005563982	0.007089561	66.87031552
Subsaharan Africa	Angola	AGO	1966	5527000	0	1889	0.852443698	FOL	Folate	mcg	0.000254381	0.000263475	54.5798729
Subsaharan Africa	Angola	AGO	1966	5527000	0	1889	0.852443698	VITC	Vitamin C	mg	0.143289875	0.048963997	0.144197529
Subsaharan Africa	Angola	AGO	1966	5527000	0	1889	0.852443698	VITA_RAE	Vitamin A	mcg	0.000194824	0.000456094	96.13105962
Subsaharan Africa	Angola	AGO	1966	5527000	0	1889	0.852443698	VITB12	Vitamin B12	mcg	1.50E-06	1.58E-06	29.10524054
Subsaharan Africa	Angola	AGO	1966	5527000	0	1889	0.852443698	VITB6A	Vitamin B6	mg	0.001315684	0.000906363	3.542539643
Subsaharan Africa	Angola	AGO	1967	5620000	0	1918	0.863541396	CA	Calcium	mg	0.576004781	0.773987244	80.30737605
Subsaharan Africa	Angola	AGO	1967	5620000	0	1918	0.863541396	VITB12	Vitamin B12	mcg	1.84E-06	1.58E-06	23.47637559
Subsaharan Africa	Angola	AGO	1967	5620000	0	1918	0.863541396	FOL	Folate	mcg	0.000264465	0.000263255	49.38870382
Subsaharan Africa	Angola	AGO	1967	5620000	0	1918	0.863541396	THIA	Thiamin	mg	0.00076907	0.000770554	50.25621271
Subsaharan Africa	Angola	AGO	1967	5620000	0	1918	0.863541396	MG	Magnesium	mg	0.354762955	0.222368842	0.862061316
Subsaharan Africa	Angola	AGO	1967	5620000	0	1918	0.863541396	VITA_RAE	Vitamin A	mcg	0.000198989	0.000455663	95.67945862
Subsaharan Africa	Angola	AGO	1967	5620000	0	1918	0.863541396	P	Phosphorus	mg	0.849513569	0.616971812	6.582424904
Subsaharan Africa	Angola	AGO	1967	5620000	0	1918	0.863541396	CU	Copper	mcg	0.001206193	0.000560555	2.279358018
Subsaharan Africa	Angola	AGO	1967	5620000	0	1918	0.863541396	FE	Iron	mg	0.005753998	0.007082935	63.56074396
Subsaharan Africa	Angola	AGO	1967	5620000	0	1918	0.863541396	NIA	Niacin	mg	0.010277335	0.009324697	34.13975778
Subsaharan Africa	Angola	AGO	1967	5620000	0	1918	0.863541396	VITC	Vitamin C	mg	0.142211029	0.048879797	0.151491865
Subsaharan Africa	Angola	AGO	1967	5620000	0	1918	0.863541396	RIBF	Riboflavin	mg	0.000745863	0.000814284	61.0294127
Subsaharan Africa	Angola	AGO	1967	5620000	0	1918	0.863541396	VITB6A	Vitamin B6	mg	0.001353276	0.000905299	2.388830908
Subsaharan Africa	Angola	AGO	1967	5620000	0	1918	0.863541396	ZN	Zinc	mg	0.001631005	0.001729996	59.05194292
Subsaharan Africa	Angola	AGO	1968	5715000	0	1852	0.86673793	MG	Magnesium	mg	0.335541787	0.222397722	2.092613877
Subsaharan Africa	Angola	AGO	1968	5715000	0	1852	0.86673793	CU	Copper	mcg	0.001155226	0.000560491	2.878701714
Subsaharan Africa	Angola	AGO	1968	5715000	0	1852	0.86673793	CA	Calcium	mg	0.565263829	0.774671437	81.62217614
Subsaharan Africa	Angola	AGO	1968	5715000	0	1852	0.86673793	P	Phosphorus	mg	0.804127846	0.618269004	11.45953019
Subsaharan Africa	Angola	AGO	1968	5715000	0	1852	0.86673793	RIBF	Riboflavin	mg	0.000721348	0.000814223	64.81079725
Subsaharan Africa	Angola	AGO	1968	5715000	0	1852	0.86673793	THIA	Thiamin	mg	0.000739589	0.00077047	55.31414796
Subsaharan Africa	Angola	AGO	1968	5715000	0	1852	0.86673793	VITB6A	Vitamin B6	mg	0.001307956	0.000904952	3.742944285
Subsaharan Africa	Angola	AGO	1968	5715000	0	1852	0.86673793	VITB12	Vitamin B12	mcg	1.89E-06	1.58E-06	22.88456621
Subsaharan Africa	Angola	AGO	1968	5715000	0	1852	0.86673793	FE	Iron	mg	0.005599537	0.007084196	66.19663626
Subsaharan Africa	Angola	AGO	1968	5715000	0	1852	0.86673793	FOL	Folate	mcg	0.00025419	0.00026324	54.56158793
Subsaharan Africa	Angola	AGO	1968	5715000	0	1852	0.86673793	NIA	Niacin	mg	0.010084375	0.009324335	37.21948812
Subsaharan Africa	Angola	AGO	1968	5715000	0	1852	0.86673793	VITA_RAE	Vitamin A	mcg	0.000192658	0.000455595	96.32397975
Subsaharan Africa	Angola	AGO	1968	5715000	0	1852	0.86673793	ZN	Zinc	mg	0.001627264	0.001729584	59.35305148
Subsaharan Africa	Angola	AGO	1968	5715000	0	1852	0.86673793	VITC	Vitamin C	mg	0.13920046	0.048851228	0.180326317
Subsaharan Africa	Angola	AGO	1969	5817000	0	1946	0.853536503	MG	Magnesium	mg	0.353723438	0.222556628	0.920034193
Subsaharan Africa	Angola	AGO	1969	5817000	0	1946	0.853536503	VITB6A	Vitamin B6	mg	0.001374262	0.000905023	1.904283082
Subsaharan Africa	Angola	AGO	1969	5817000	0	1946	0.853536503	VITB12	Vitamin B12	mcg	1.83E-06	1.58E-06	23.69701171
Subsaharan Africa	Angola	AGO	1969	5817000	0	1946	0.853536503	CA	Calcium	mg	0.572631257	0.775515885	80.84071516
Subsaharan Africa	Angola	AGO	1969	5817000	0	1946	0.853536503	VITA_RAE	Vitamin A	mcg	0.000204879	0.000455723	95.02230152
Subsaharan Africa	Angola	AGO	1969	5817000	0	1946	0.853536503	FE	Iron	mg	0.005735367	0.007089288	63.96366587
Subsaharan Africa	Angola	AGO	1969	5817000	0	1946	0.853536503	RIBF	Riboflavin	mg	0.000755334	0.000814498	59.56597058
Subsaharan Africa	Angola	AGO	1969	5817000	0	1946	0.853536503	ZN	Zinc	mg	0.001621693	0.001730159	59.90027835
Subsaharan Africa	Angola	AGO	1969	5817000	0	1946	0.853536503	P	Phosphorus	mg	0.843040127	0.61958558	7.456567531
Subsaharan Africa	Angola	AGO	1969	5817000	0	1946	0.853536503	THIA	Thiamin	mg	0.00075933	0.000770701	51.96114587
Subsaharan Africa	Angola	AGO	1969	5817000	0	1946	0.853536503	NIA	Niacin	mg	0.010243804	0.009327754	34.72232721
Subsaharan Africa	Angola	AGO	1969	5817000	0	1946	0.853536503	FOL	Folate	mcg	0.000251615	0.000263332	55.89557627
Subsaharan Africa	Angola	AGO	1969	5817000	0	1946	0.853536503	CU	Copper	mcg	0.001185715	0.000560672	2.506597296
Subsaharan Africa	Angola	AGO	1969	5817000	0	1946	0.853536503	VITC	Vitamin C	mg	0.145990322	0.048854852	0.120627231
Subsaharan Africa	Angola	AGO	1970	5928000	0	1965	0.85978553	VITA_RAE	Vitamin A	mcg	0.000203274	0.000455903	95.21680628
Subsaharan Africa	Angola	AGO	1970	5928000	0	1965	0.85978553	CU	Copper	mcg	0.001203356	0.000560891	2.316799742
Subsaharan Africa	Angola	AGO	1970	5928000	0	1965	0.85978553	NIA	Niacin	mg	0.010432168	0.009331483	31.8529138
Subsaharan Africa	Angola	AGO	1970	5928000	0	1965	0.85978553	FE	Iron	mg	0.005912791	0.007094712	61.04114632
Subsaharan Africa	Angola	AGO	1970	5928000	0	1965	0.85978553	FOL	Folate	mcg	0.000264457	0.000263449	49.49114798
Subsaharan Africa	Angola	AGO	1970	5928000	0	1965	0.85978553	MG	Magnesium	mg	0.349241008	0.222706063	1.152271274
Subsaharan Africa	Angola	AGO	1970	5928000	0	1965	0.85978553	VITB6A	Vitamin B6	mg	0.001409659	0.000905273	1.291827737
Subsaharan Africa	Angola	AGO	1970	5928000	0	1965	0.85978553	P	Phosphorus	mg	0.836465506	0.620510384	8.19441118
Subsaharan Africa	Angola	AGO	1970	5928000	0	1965	0.85978553	VITC	Vitamin C	mg	0.147581077	0.048871418	0.110170498
Subsaharan Africa	Angola	AGO	1970	5928000	0	1965	0.85978553	ZN	Zinc	mg	0.001689201	0.001731039	53.85088974
Subsaharan Africa	Angola	AGO	1970	5928000	0	1965	0.85978553	CA	Calcium	mg	0.589710272	0.776119376	78.83193104
Subsaharan Africa	Angola	AGO	1970	5928000	0	1965	0.85978553	THIA	Thiamin	mg	0.000763103	0.00077099	51.35999914
Subsaharan Africa	Angola	AGO	1970	5928000	0	1965	0.85978553	VITB12	Vitamin B12	mcg	1.94E-06	1.58E-06	22.25727223
Subsaharan Africa	Angola	AGO	1970	5928000	0	1965	0.85978553	RIBF	Riboflavin	mg	0.00076621	0.000814833	57.88334877
Subsaharan Africa	Angola	AGO	1971	6049000	0	1999	0.854191421	FOL	Folate	mcg	0.000270452	0.000263193	46.33728625
Subsaharan Africa	Angola	AGO	1971	6049000	0	1999	0.854191421	P	Phosphorus	mg	0.841060386	0.620755578	7.786334724
Subsaharan Africa	Angola	AGO	1971	6049000	0	1999	0.854191421	VITB6A	Vitamin B6	mg	0.001391476	0.000904142	1.554146808
Subsaharan Africa	Angola	AGO	1971	6049000	0	1999	0.854191421	VITC	Vitamin C	mg	0.147354838	0.048787783	0.110000006
Subsaharan Africa	Angola	AGO	1971	6049000	0	1999	0.854191421	RIBF	Riboflavin	mg	0.000760965	0.000814016	58.59888573
Subsaharan Africa	Angola	AGO	1971	6049000	0	1999	0.854191421	MG	Magnesium	mg	0.355446929	0.222365147	0.833441056
Subsaharan Africa	Angola	AGO	1971	6049000	0	1999	0.854191421	VITB12	Vitamin B12	mcg	1.68E-06	1.58E-06	25.91373731
Subsaharan Africa	Angola	AGO	1971	6049000	0	1999	0.854191421	ZN	Zinc	mg	0.00167779	0.001728617	54.68129736
Subsaharan Africa	Angola	AGO	1971	6049000	0	1999	0.854191421	THIA	Thiamin	mg	0.000775887	0.000770205	49.01914982
Subsaharan Africa	Angola	AGO	1971	6049000	0	1999	0.854191421	VITA_RAE	Vitamin A	mcg	0.000200306	0.000455428	95.52534503
Subsaharan Africa	Angola	AGO	1971	6049000	0	1999	0.854191421	FE	Iron	mg	0.005990836	0.007087125	59.62208359
Subsaharan Africa	Angola	AGO	1971	6049000	0	1999	0.854191421	CA	Calcium	mg	0.591677701	0.775790514	78.55502225
Subsaharan Africa	Angola	AGO	1971	6049000	0	1999	0.854191421	CU	Copper	mcg	0.001224648	0.000560276	2.088944495
Subsaharan Africa	Angola	AGO	1971	6049000	0	1999	0.854191421	NIA	Niacin	mg	0.010499075	0.00932208	30.67670041
Subsaharan Africa	Angola	AGO	1972	6181000	0	1957	0.819331299	VITB12	Vitamin B12	mcg	1.32E-06	1.58E-06	33.01982199
Subsaharan Africa	Angola	AGO	1972	6181000	0	1957	0.819331299	VITA_RAE	Vitamin A	mcg	0.000205465	0.000455331	94.93269679
Subsaharan Africa	Angola	AGO	1972	6181000	0	1957	0.819331299	P	Phosphorus	mg	0.817912646	0.621427841	10.29838396
Subsaharan Africa	Angola	AGO	1972	6181000	0	1957	0.819331299	RIBF	Riboflavin	mg	0.000728879	0.000813886	63.61369868
Subsaharan Africa	Angola	AGO	1972	6181000	0	1957	0.819331299	CU	Copper	mcg	0.001189986	0.000560172	2.445999429
Subsaharan Africa	Angola	AGO	1972	6181000	0	1957	0.819331299	VITC	Vitamin C	mg	0.143453375	0.048762429	0.137893378
Subsaharan Africa	Angola	AGO	1972	6181000	0	1957	0.819331299	FE	Iron	mg	0.003896263	0.007087319	91.3140387
Subsaharan Africa	Angola	AGO	1972	6181000	0	1957	0.819331299	THIA	Thiamin	mg	0.000756868	0.000770049	52.27493711
Subsaharan Africa	Angola	AGO	1972	6181000	0	1957	0.819331299	MG	Magnesium	mg	0.347516466	0.222318297	1.214240622
Subsaharan Africa	Angola	AGO	1972	6181000	0	1957	0.819331299	NIA	Niacin	mg	0.009991023	0.009320798	38.68166041
Subsaharan Africa	Angola	AGO	1972	6181000	0	1957	0.819331299	ZN	Zinc	mg	0.001630623	0.001728039	58.92021515
Subsaharan Africa	Angola	AGO	1972	6181000	0	1957	0.819331299	CA	Calcium	mg	0.579290575	0.776075088	80.10039025
Subsaharan Africa	Angola	AGO	1972	6181000	0	1957	0.819331299	VITB6A	Vitamin B6	mg	0.001298971	0.000903754	4.01264254
Subsaharan Africa	Angola	AGO	1972	6181000	0	1957	0.819331299	FOL	Folate	mcg	0.000258299	0.000263142	52.44628353
Subsaharan Africa	Angola	AGO	1973	6323000	0	1912	0.841639663	VITB6A	Vitamin B6	mg	0.00129713	0.000903882	4.090629442
Subsaharan Africa	Angola	AGO	1973	6323000	0	1912	0.841639663	FE	Iron	mg	0.005751087	0.007092399	63.74014365
Subsaharan Africa	Angola	AGO	1973	6323000	0	1912	0.841639663	VITB12	Vitamin B12	mcg	1.29E-06	1.58E-06	33.70308097
Subsaharan Africa	Angola	AGO	1973	6323000	0	1912	0.841639663	VITA_RAE	Vitamin A	mcg	0.0001965	0.000455484	95.93360477
Subsaharan Africa	Angola	AGO	1973	6323000	0	1912	0.841639663	P	Phosphorus	mg	0.795406319	0.622303089	13.29268372
Subsaharan Africa	Angola	AGO	1973	6323000	0	1912	0.841639663	NIA	Niacin	mg	0.009883604	0.009324565	40.52372961
Subsaharan Africa	Angola	AGO	1973	6323000	0	1912	0.841639663	FOL	Folate	mcg	0.000253777	0.000263228	54.76343606
Subsaharan Africa	Angola	AGO	1973	6323000	0	1912	0.841639663	CU	Copper	mcg	0.001167346	0.00056039	2.719913769
Subsaharan Africa	Angola	AGO	1973	6323000	0	1912	0.841639663	MG	Magnesium	mg	0.335432767	0.222449802	2.109643604
Subsaharan Africa	Angola	AGO	1973	6323000	0	1912	0.841639663	THIA	Thiamin	mg	0.000743126	0.000770295	54.67951731
Subsaharan Africa	Angola	AGO	1973	6323000	0	1912	0.841639663	RIBF	Riboflavin	mg	0.000731144	0.000814199	63.30815303
Subsaharan Africa	Angola	AGO	1973	6323000	0	1912	0.841639663	ZN	Zinc	mg	0.001655517	0.001728695	56.722899
Subsaharan Africa	Angola	AGO	1973	6323000	0	1912	0.841639663	VITC	Vitamin C	mg	0.142116103	0.048776005	0.149638877
Subsaharan Africa	Angola	AGO	1973	6323000	0	1912	0.841639663	CA	Calcium	mg	0.578630644	0.77669028	80.23417685
Subsaharan Africa	Angola	AGO	1974	6475000	0	1874	0.835844123	VITA_RAE	Vitamin A	mcg	0.000197362	0.000455739	95.85535885
Subsaharan Africa	Angola	AGO	1974	6475000	0	1874	0.835844123	FOL	Folate	mcg	0.000254479	0.00026337	54.47987667
Subsaharan Africa	Angola	AGO	1974	6475000	0	1874	0.835844123	RIBF	Riboflavin	mg	0.000718106	0.000814674	65.36218546
Subsaharan Africa	Angola	AGO	1974	6475000	0	1874	0.835844123	MG	Magnesium	mg	0.34469276	0.222633523	1.415342622
Subsaharan Africa	Angola	AGO	1974	6475000	0	1874	0.835844123	THIA	Thiamin	mg	0.000751218	0.000770694	53.35662113
Subsaharan Africa	Angola	AGO	1974	6475000	0	1874	0.835844123	FE	Iron	mg	0.003736094	0.007099118	92.97090868
Subsaharan Africa	Angola	AGO	1974	6475000	0	1874	0.835844123	CU	Copper	mcg	0.001154086	0.000560719	2.900118497
Subsaharan Africa	Angola	AGO	1974	6475000	0	1874	0.835844123	VITC	Vitamin C	mg	0.13443407	0.048807008	0.238190637
Subsaharan Africa	Angola	AGO	1974	6475000	0	1874	0.835844123	ZN	Zinc	mg	0.001605894	0.001729892	61.28365712
Subsaharan Africa	Angola	AGO	1974	6475000	0	1874	0.835844123	CA	Calcium	mg	0.552499083	0.777307871	83.2489239
Subsaharan Africa	Angola	AGO	1974	6475000	0	1874	0.835844123	VITB12	Vitamin B12	mcg	1.45E-06	1.58E-06	30.27766844
Subsaharan Africa	Angola	AGO	1974	6475000	0	1874	0.835844123	VITB6A	Vitamin B6	mg	0.001313101	0.000904258	3.52623525
Subsaharan Africa	Angola	AGO	1974	6475000	0	1874	0.835844123	NIA	Niacin	mg	0.009757221	0.009329963	42.73295966
Subsaharan Africa	Angola	AGO	1974	6475000	0	1874	0.835844123	P	Phosphorus	mg	0.811918426	0.623094814	11.27243907
Subsaharan Africa	Angola	AGO	1975	6638000	0	1857	0.833429152	P	Phosphorus	mg	0.838332872	0.623468505	8.4022966
Subsaharan Africa	Angola	AGO	1975	6638000	0	1857	0.833429152	VITB12	Vitamin B12	mcg	1.28E-06	1.58E-06	33.96726677
Subsaharan Africa	Angola	AGO	1975	6638000	0	1857	0.833429152	VITA_RAE	Vitamin A	mcg	0.0001957	0.000455958	96.03664783
Subsaharan Africa	Angola	AGO	1975	6638000	0	1857	0.833429152	FE	Iron	mg	0.003810511	0.007104398	92.28294196
Subsaharan Africa	Angola	AGO	1975	6638000	0	1857	0.833429152	ZN	Zinc	mg	0.001594388	0.001730993	62.38725281
Subsaharan Africa	Angola	AGO	1975	6638000	0	1857	0.833429152	THIA	Thiamin	mg	0.000777002	0.000771019	48.96817901
Subsaharan Africa	Angola	AGO	1975	6638000	0	1857	0.833429152	NIA	Niacin	mg	0.009707406	0.009333847	43.64058992
Subsaharan Africa	Angola	AGO	1975	6638000	0	1857	0.833429152	CU	Copper	mcg	0.001170446	0.000560966	2.696268506
Subsaharan Africa	Angola	AGO	1975	6638000	0	1857	0.833429152	CA	Calcium	mg	0.53272241	0.777591879	85.30700068
Subsaharan Africa	Angola	AGO	1975	6638000	0	1857	0.833429152	MG	Magnesium	mg	0.35589787	0.222753163	0.840374099
Subsaharan Africa	Angola	AGO	1975	6638000	0	1857	0.833429152	VITC	Vitamin C	mg	0.122002854	0.048836571	0.509734664
Subsaharan Africa	Angola	AGO	1975	6638000	0	1857	0.833429152	VITB6A	Vitamin B6	mg	0.001267722	0.000904641	5.420137552
Subsaharan Africa	Angola	AGO	1975	6638000	0	1857	0.833429152	FOL	Folate	mcg	0.000261045	0.000263494	51.23615639
Subsaharan Africa	Angola	AGO	1975	6638000	0	1857	0.833429152	RIBF	Riboflavin	mg	0.000708537	0.00081505	66.84402223
Subsaharan Africa	Angola	AGO	1976	6809000	0	1887	0.840846182	P	Phosphorus	mg	0.835183248	0.623248432	8.688414729
Subsaharan Africa	Angola	AGO	1976	6809000	0	1887	0.840846182	THIA	Thiamin	mg	0.000770321	0.000770368	50.00811809
Subsaharan Africa	Angola	AGO	1976	6809000	0	1887	0.840846182	NIA	Niacin	mg	0.009881058	0.009325645	40.58511861
Subsaharan Africa	Angola	AGO	1976	6809000	0	1887	0.840846182	FE	Iron	mg	0.003739378	0.007098169	92.93544684
Subsaharan Africa	Angola	AGO	1976	6809000	0	1887	0.840846182	CU	Copper	mcg	0.001152258	0.00056044	2.91692609
Subsaharan Africa	Angola	AGO	1976	6809000	0	1887	0.840846182	CA	Calcium	mg	0.538265669	0.777019564	84.71365433
Subsaharan Africa	Angola	AGO	1976	6809000	0	1887	0.840846182	RIBF	Riboflavin	mg	0.00071334	0.000814361	66.03782717
Subsaharan Africa	Angola	AGO	1976	6809000	0	1887	0.840846182	VITA_RAE	Vitamin A	mcg	0.000198542	0.000455574	95.72313344
Subsaharan Africa	Angola	AGO	1976	6809000	0	1887	0.840846182	VITB12	Vitamin B12	mcg	1.82E-06	1.58E-06	23.90393597
Subsaharan Africa	Angola	AGO	1976	6809000	0	1887	0.840846182	MG	Magnesium	mg	0.351189489	0.222432052	1.029422617
Subsaharan Africa	Angola	AGO	1976	6809000	0	1887	0.840846182	FOL	Folate	mcg	0.000255785	0.00026328	53.78020479
Subsaharan Africa	Angola	AGO	1976	6809000	0	1887	0.840846182	VITC	Vitamin C	mg	0.120617703	0.048773436	0.549724435
Subsaharan Africa	Angola	AGO	1976	6809000	0	1887	0.840846182	ZN	Zinc	mg	0.001584763	0.00172908	63.07572883
Subsaharan Africa	Angola	AGO	1976	6809000	0	1887	0.840846182	VITB6A	Vitamin B6	mg	0.001305937	0.00090373	3.75210046
Subsaharan Africa	Angola	AGO	1977	6990000	0	1950	0.85704695	VITB12	Vitamin B12	mcg	2.36E-06	1.58E-06	17.55687877
Subsaharan Africa	Angola	AGO	1977	6990000	0	1950	0.85704695	VITB6A	Vitamin B6	mg	0.001311126	0.00090314	3.53837186
Subsaharan Africa	Angola	AGO	1977	6990000	0	1950	0.85704695	ZN	Zinc	mg	0.001665668	0.001727952	55.73206565
Subsaharan Africa	Angola	AGO	1977	6990000	0	1950	0.85704695	VITC	Vitamin C	mg	0.119227124	0.048734464	0.595415655
Subsaharan Africa	Angola	AGO	1977	6990000	0	1950	0.85704695	CA	Calcium	mg	0.562267765	0.776665856	82.12565837
Subsaharan Africa	Angola	AGO	1977	6990000	0	1950	0.85704695	P	Phosphorus	mg	0.850798758	0.623176106	7.200104644
Subsaharan Africa	Angola	AGO	1977	6990000	0	1950	0.85704695	VITA_RAE	Vitamin A	mcg	0.000212753	0.000455346	94.02963777
Subsaharan Africa	Angola	AGO	1977	6990000	0	1950	0.85704695	THIA	Thiamin	mg	0.000780661	0.000769976	48.15515118
Subsaharan Africa	Angola	AGO	1977	6990000	0	1950	0.85704695	MG	Magnesium	mg	0.346230852	0.222228142	1.2807834
Subsaharan Africa	Angola	AGO	1977	6990000	0	1950	0.85704695	FE	Iron	mg	0.005760063	0.007095081	63.62506091
Subsaharan Africa	Angola	AGO	1977	6990000	0	1950	0.85704695	FOL	Folate	mcg	0.000256136	0.000263154	53.54178876
Subsaharan Africa	Angola	AGO	1977	6990000	0	1950	0.85704695	RIBF	Riboflavin	mg	0.000742391	0.000813948	61.5254803
Subsaharan Africa	Angola	AGO	1977	6990000	0	1950	0.85704695	CU	Copper	mcg	0.001146407	0.000560116	2.987477069
Subsaharan Africa	Angola	AGO	1977	6990000	0	1950	0.85704695	NIA	Niacin	mg	0.010330177	0.009320632	33.24159795
Subsaharan Africa	Angola	AGO	1978	7184000	0	1990	0.855965436	CA	Calcium	mg	0.581264042	0.776432611	79.89525912
Subsaharan Africa	Angola	AGO	1978	7184000	0	1990	0.855965436	RIBF	Riboflavin	mg	0.00077146	0.000813739	56.87486169
Subsaharan Africa	Angola	AGO	1978	7184000	0	1990	0.855965436	VITA_RAE	Vitamin A	mcg	0.000216091	0.000455237	93.58016836
Subsaharan Africa	Angola	AGO	1978	7184000	0	1990	0.855965436	CU	Copper	mcg	0.001149131	0.000559939	2.945239373
Subsaharan Africa	Angola	AGO	1978	7184000	0	1990	0.855965436	VITB6A	Vitamin B6	mg	0.001321571	0.000902811	3.177251911
Subsaharan Africa	Angola	AGO	1978	7184000	0	1990	0.855965436	FOL	Folate	mcg	0.000257558	0.000263093	52.79548049
Subsaharan Africa	Angola	AGO	1978	7184000	0	1990	0.855965436	FE	Iron	mg	0.005807009	0.007094149	62.81827086
Subsaharan Africa	Angola	AGO	1978	7184000	0	1990	0.855965436	NIA	Niacin	mg	0.010581807	0.00931788	29.37089621
Subsaharan Africa	Angola	AGO	1978	7184000	0	1990	0.855965436	THIA	Thiamin	mg	0.000797864	0.000769773	45.15914651
Subsaharan Africa	Angola	AGO	1978	7184000	0	1990	0.855965436	VITC	Vitamin C	mg	0.116505261	0.048714442	0.702521056
Subsaharan Africa	Angola	AGO	1978	7184000	0	1990	0.855965436	VITB12	Vitamin B12	mcg	2.33E-06	1.58E-06	17.86491699
Subsaharan Africa	Angola	AGO	1978	7184000	0	1990	0.855965436	ZN	Zinc	mg	0.00165541	0.00172743	56.62238183
Subsaharan Africa	Angola	AGO	1978	7184000	0	1990	0.855965436	P	Phosphorus	mg	0.86550901	0.623156631	5.989645264
Subsaharan Africa	Angola	AGO	1978	7184000	0	1990	0.855965436	MG	Magnesium	mg	0.350831208	0.222105652	1.021716032
Subsaharan Africa	Angola	AGO	1979	7399000	0	1966	0.864146654	VITC	Vitamin C	mg	0.111364288	0.048707215	0.966218592
Subsaharan Africa	Angola	AGO	1979	7399000	0	1966	0.864146654	VITB12	Vitamin B12	mcg	2.15E-06	1.58E-06	19.67198767
Subsaharan Africa	Angola	AGO	1979	7399000	0	1966	0.864146654	ZN	Zinc	mg	0.001672038	0.001727281	55.0898058
Subsaharan Africa	Angola	AGO	1979	7399000	0	1966	0.864146654	FE	Iron	mg	0.005966744	0.007094119	60.12550664
Subsaharan Africa	Angola	AGO	1979	7399000	0	1966	0.864146654	CU	Copper	mcg	0.00112882	0.00055984	3.231681605
Subsaharan Africa	Angola	AGO	1979	7399000	0	1966	0.864146654	MG	Magnesium	mg	0.337066899	0.222024305	1.91041728
Subsaharan Africa	Angola	AGO	1979	7399000	0	1966	0.864146654	FOL	Folate	mcg	0.000262557	0.00026307	50.25964582
Subsaharan Africa	Angola	AGO	1979	7399000	0	1966	0.864146654	VITB6A	Vitamin B6	mg	0.001311096	0.000902662	3.515502257
Subsaharan Africa	Angola	AGO	1979	7399000	0	1966	0.864146654	VITA_RAE	Vitamin A	mcg	0.00020983	0.000455198	94.39386312
Subsaharan Africa	Angola	AGO	1979	7399000	0	1966	0.864146654	P	Phosphorus	mg	0.832290391	0.623034293	8.956082285
Subsaharan Africa	Angola	AGO	1979	7399000	0	1966	0.864146654	CA	Calcium	mg	0.578930057	0.776187815	80.15364681
Subsaharan Africa	Angola	AGO	1979	7399000	0	1966	0.864146654	THIA	Thiamin	mg	0.000806105	0.000769677	43.73222398
Subsaharan Africa	Angola	AGO	1979	7399000	0	1966	0.864146654	NIA	Niacin	mg	0.010657116	0.00931629	28.2412015
Subsaharan Africa	Angola	AGO	1979	7399000	0	1966	0.864146654	RIBF	Riboflavin	mg	0.000766589	0.000813643	57.64298207
Subsaharan Africa	Angola	AGO	1980	7637000	0	1966	0.866870987	CU	Copper	mcg	0.00115091	0.000559699	2.914570507
Subsaharan Africa	Angola	AGO	1980	7637000	0	1966	0.866870987	VITA_RAE	Vitamin A	mcg	0.000205813	0.000455139	94.88119532
Subsaharan Africa	Angola	AGO	1980	7637000	0	1966	0.866870987	VITB6A	Vitamin B6	mg	0.001340164	0.000902532	2.621570938
Subsaharan Africa	Angola	AGO	1980	7637000	0	1966	0.866870987	NIA	Niacin	mg	0.011068451	0.009313898	22.55686992
Subsaharan Africa	Angola	AGO	1980	7637000	0	1966	0.866870987	VITB12	Vitamin B12	mcg	2.19E-06	1.58E-06	19.21471025
Subsaharan Africa	Angola	AGO	1980	7637000	0	1966	0.866870987	CA	Calcium	mg	0.571889182	0.775711293	80.94443129
Subsaharan Africa	Angola	AGO	1980	7637000	0	1966	0.866870987	FOL	Folate	mcg	0.000266032	0.000263034	48.48486955
Subsaharan Africa	Angola	AGO	1980	7637000	0	1966	0.866870987	ZN	Zinc	mg	0.001691475	0.001727084	53.28638334
Subsaharan Africa	Angola	AGO	1980	7637000	0	1966	0.866870987	THIA	Thiamin	mg	0.000832777	0.000769544	39.20830123
Subsaharan Africa	Angola	AGO	1980	7637000	0	1966	0.866870987	MG	Magnesium	mg	0.347537445	0.221911938	1.177412048
Subsaharan Africa	Angola	AGO	1980	7637000	0	1966	0.866870987	VITC	Vitamin C	mg	0.108395803	0.048701015	1.162153592
Subsaharan Africa	Angola	AGO	1980	7637000	0	1966	0.866870987	RIBF	Riboflavin	mg	0.000782692	0.00081349	55.02127966
Subsaharan Africa	Angola	AGO	1980	7637000	0	1966	0.866870987	FE	Iron	mg	0.006042197	0.007092926	58.8443033
Subsaharan Africa	Angola	AGO	1980	7637000	0	1966	0.866870987	P	Phosphorus	mg	0.852413493	0.622565506	6.986738287
Subsaharan Africa	Angola	AGO	1981	7902000	0	1886	0.872247341	FOL	Folate	mcg	0.000241368	0.000262621	60.63261198
Subsaharan Africa	Angola	AGO	1981	7902000	0	1886	0.872247341	ZN	Zinc	mg	0.001677319	0.001723524	54.26983576
Subsaharan Africa	Angola	AGO	1981	7902000	0	1886	0.872247341	FE	Iron	mg	0.005617833	0.007079579	65.82441699
Subsaharan Africa	Angola	AGO	1981	7902000	0	1886	0.872247341	CU	Copper	mcg	0.001090103	0.000558703	3.825999256
Subsaharan Africa	Angola	AGO	1981	7902000	0	1886	0.872247341	VITB6A	Vitamin B6	mg	0.001300123	0.000900912	3.815780088
Subsaharan Africa	Angola	AGO	1981	7902000	0	1886	0.872247341	CA	Calcium	mg	0.590140543	0.774302585	78.60552237
Subsaharan Africa	Angola	AGO	1981	7902000	0	1886	0.872247341	MG	Magnesium	mg	0.334896763	0.221313789	2.004183513
Subsaharan Africa	Angola	AGO	1981	7902000	0	1886	0.872247341	RIBF	Riboflavin	mg	0.000795362	0.000812161	52.74837595
Subsaharan Africa	Angola	AGO	1981	7902000	0	1886	0.872247341	VITC	Vitamin C	mg	0.10442734	0.048590622	1.468471116
Subsaharan Africa	Angola	AGO	1981	7902000	0	1886	0.872247341	VITA_RAE	Vitamin A	mcg	0.000213439	0.00045441	93.88246044
Subsaharan Africa	Angola	AGO	1981	7902000	0	1886	0.872247341	NIA	Niacin	mg	0.010596035	0.009298128	28.83020412
Subsaharan Africa	Angola	AGO	1981	7902000	0	1886	0.872247341	VITB12	Vitamin B12	mcg	2.40E-06	1.57E-06	17.1432151
Subsaharan Africa	Angola	AGO	1981	7902000	0	1886	0.872247341	P	Phosphorus	mg	0.848120131	0.621531153	7.238402607
Subsaharan Africa	Angola	AGO	1981	7902000	0	1886	0.872247341	THIA	Thiamin	mg	0.000792957	0.000768321	45.74421074
Subsaharan Africa	Angola	AGO	1982	8190000	0	1760	0.875239928	ZN	Zinc	mg	0.001664481	0.001721482	55.26847529
Subsaharan Africa	Angola	AGO	1982	8190000	0	1760	0.875239928	MG	Magnesium	mg	0.313927152	0.220985154	4.625329389
Subsaharan Africa	Angola	AGO	1982	8190000	0	1760	0.875239928	FOL	Folate	mcg	0.000217734	0.00026238	71.47093171
Subsaharan Africa	Angola	AGO	1982	8190000	0	1760	0.875239928	FE	Iron	mg	0.005377857	0.007072605	69.79227713
Subsaharan Africa	Angola	AGO	1982	8190000	0	1760	0.875239928	VITC	Vitamin C	mg	0.100941739	0.048527394	1.814098658
Subsaharan Africa	Angola	AGO	1982	8190000	0	1760	0.875239928	VITB6A	Vitamin B6	mg	0.001274645	0.000899894	4.788132325
Subsaharan Africa	Angola	AGO	1982	8190000	0	1760	0.875239928	RIBF	Riboflavin	mg	0.000749056	0.000811408	60.10813191
Subsaharan Africa	Angola	AGO	1982	8190000	0	1760	0.875239928	CU	Copper	mcg	0.001010143	0.00055814	5.522316036
Subsaharan Africa	Angola	AGO	1982	8190000	0	1760	0.875239928	CA	Calcium	mg	0.524856318	0.773503443	85.80319674
Subsaharan Africa	Angola	AGO	1982	8190000	0	1760	0.875239928	P	Phosphorus	mg	0.803629657	0.620959083	11.96577167
Subsaharan Africa	Angola	AGO	1982	8190000	0	1760	0.875239928	THIA	Thiamin	mg	0.000743207	0.000767634	54.22356863
Subsaharan Africa	Angola	AGO	1982	8190000	0	1760	0.875239928	NIA	Niacin	mg	0.010748323	0.009289373	26.49289048
Subsaharan Africa	Angola	AGO	1982	8190000	0	1760	0.875239928	VITA_RAE	Vitamin A	mcg	0.000217689	0.000453993	93.27946707
Subsaharan Africa	Angola	AGO	1982	8190000	0	1760	0.875239928	VITB12	Vitamin B12	mcg	3.43E-06	1.57E-06	10.54623485
Subsaharan Africa	Angola	AGO	1983	8490000	0	1731	0.875536779	NIA	Niacin	mg	0.01051777	0.009285178	29.77115984
Subsaharan Africa	Angola	AGO	1983	8490000	0	1731	0.875536779	FE	Iron	mg	0.005236455	0.007069751	72.12472357
Subsaharan Africa	Angola	AGO	1983	8490000	0	1731	0.875536779	MG	Magnesium	mg	0.310570245	0.220829472	5.202572399
Subsaharan Africa	Angola	AGO	1983	8490000	0	1731	0.875536779	ZN	Zinc	mg	0.001626016	0.001720454	58.68949192
Subsaharan Africa	Angola	AGO	1983	8490000	0	1731	0.875536779	FOL	Folate	mcg	0.000209429	0.000262253	74.90204687
Subsaharan Africa	Angola	AGO	1983	8490000	0	1731	0.875536779	P	Phosphorus	mg	0.795800741	0.620677224	12.95340689
Subsaharan Africa	Angola	AGO	1983	8490000	0	1731	0.875536779	THIA	Thiamin	mg	0.000735529	0.000767297	55.48829571
Subsaharan Africa	Angola	AGO	1983	8490000	0	1731	0.875536779	CA	Calcium	mg	0.528654472	0.773093183	85.40453607
Subsaharan Africa	Angola	AGO	1983	8490000	0	1731	0.875536779	CU	Copper	mcg	0.000993856	0.000557861	5.943893108
Subsaharan Africa	Angola	AGO	1983	8490000	0	1731	0.875536779	VITB6A	Vitamin B6	mg	0.001249587	0.000899298	5.961000427
Subsaharan Africa	Angola	AGO	1983	8490000	0	1731	0.875536779	VITC	Vitamin C	mg	0.100523703	0.048495688	1.854928697
Subsaharan Africa	Angola	AGO	1983	8490000	0	1731	0.875536779	RIBF	Riboflavin	mg	0.000744288	0.000811037	60.80865519
Subsaharan Africa	Angola	AGO	1983	8490000	0	1731	0.875536779	VITA_RAE	Vitamin A	mcg	0.000219221	0.000453784	93.04998706
Subsaharan Africa	Angola	AGO	1983	8490000	0	1731	0.875536779	VITB12	Vitamin B12	mcg	3.25E-06	1.57E-06	11.40711681
Subsaharan Africa	Angola	AGO	1984	8785000	0	1674	0.900202656	P	Phosphorus	mg	0.771483228	0.620558164	16.53178354
Subsaharan Africa	Angola	AGO	1984	8785000	0	1674	0.900202656	NIA	Niacin	mg	0.010493676	0.009283884	30.10983757
Subsaharan Africa	Angola	AGO	1984	8785000	0	1674	0.900202656	RIBF	Riboflavin	mg	0.000754279	0.000810918	59.20479961
Subsaharan Africa	Angola	AGO	1984	8785000	0	1674	0.900202656	THIA	Thiamin	mg	0.000718575	0.000767188	58.36415556
Subsaharan Africa	Angola	AGO	1984	8785000	0	1674	0.900202656	VITB12	Vitamin B12	mcg	3.57E-06	1.57E-06	9.948526263
Subsaharan Africa	Angola	AGO	1984	8785000	0	1674	0.900202656	VITB6A	Vitamin B6	mg	0.001233243	0.000899014	6.849508199
Subsaharan Africa	Angola	AGO	1984	8785000	0	1674	0.900202656	CA	Calcium	mg	0.540904134	0.772914366	84.14865449
Subsaharan Africa	Angola	AGO	1984	8785000	0	1674	0.900202656	MG	Magnesium	mg	0.292200837	0.220779883	9.783690001
Subsaharan Africa	Angola	AGO	1984	8785000	0	1674	0.900202656	ZN	Zinc	mg	0.001704619	0.001720113	51.43712893
Subsaharan Africa	Angola	AGO	1984	8785000	0	1674	0.900202656	FOL	Folate	mcg	0.000206232	0.000262205	76.16350905
Subsaharan Africa	Angola	AGO	1984	8785000	0	1674	0.900202656	VITA_RAE	Vitamin A	mcg	0.000219361	0.000453715	93.02543985
Subsaharan Africa	Angola	AGO	1984	8785000	0	1674	0.900202656	VITC	Vitamin C	mg	0.100127272	0.048485504	1.899484353
Subsaharan Africa	Angola	AGO	1984	8785000	0	1674	0.900202656	FE	Iron	mg	0.006290912	0.007069512	54.38957198
Subsaharan Africa	Angola	AGO	1984	8785000	0	1674	0.900202656	CU	Copper	mcg	0.000960798	0.000557769	6.928862079
Subsaharan Africa	Angola	AGO	1985	9064000	0	1686	0.91388699	THIA	Thiamin	mg	0.000723463	0.000767295	57.55083093
Subsaharan Africa	Angola	AGO	1985	9064000	0	1686	0.91388699	CU	Copper	mcg	0.000963752	0.00055785	6.838608018
Subsaharan Africa	Angola	AGO	1985	9064000	0	1686	0.91388699	RIBF	Riboflavin	mg	0.000823095	0.000811037	48.02372657
Subsaharan Africa	Angola	AGO	1985	9064000	0	1686	0.91388699	CA	Calcium	mg	0.609319889	0.772905751	75.97509164
Subsaharan Africa	Angola	AGO	1985	9064000	0	1686	0.91388699	P	Phosphorus	mg	0.810468213	0.620525221	11.04004161
Subsaharan Africa	Angola	AGO	1985	9064000	0	1686	0.91388699	NIA	Niacin	mg	0.010463877	0.009285221	30.58123225
Subsaharan Africa	Angola	AGO	1985	9064000	0	1686	0.91388699	VITB12	Vitamin B12	mcg	4.11E-06	1.57E-06	8.023247323
Subsaharan Africa	Angola	AGO	1985	9064000	0	1686	0.91388699	VITA_RAE	Vitamin A	mcg	0.000236977	0.000453783	90.28823082
Subsaharan Africa	Angola	AGO	1985	9064000	0	1686	0.91388699	FE	Iron	mg	0.006241496	0.007071656	55.23141997
Subsaharan Africa	Angola	AGO	1985	9064000	0	1686	0.91388699	ZN	Zinc	mg	0.001751723	0.001720459	47.10278898
Subsaharan Africa	Angola	AGO	1985	9064000	0	1686	0.91388699	FOL	Folate	mcg	0.000206523	0.000262234	76.05781083
Subsaharan Africa	Angola	AGO	1985	9064000	0	1686	0.91388699	MG	Magnesium	mg	0.291931432	0.220823166	9.88628751
Subsaharan Africa	Angola	AGO	1985	9064000	0	1686	0.91388699	VITC	Vitamin C	mg	0.100694584	0.048497031	1.835321006
Subsaharan Africa	Angola	AGO	1985	9064000	0	1686	0.91388699	VITB6A	Vitamin B6	mg	0.001236295	0.000899057	6.675449675
Subsaharan Africa	Angola	AGO	1986	9321000	0	1641	0.886891059	FE	Iron	mg	0.005888111	0.007061286	60.9873991
Subsaharan Africa	Angola	AGO	1986	9321000	0	1641	0.886891059	NIA	Niacin	mg	0.010223616	0.009272622	34.081595
Subsaharan Africa	Angola	AGO	1986	9321000	0	1641	0.886891059	VITC	Vitamin C	mg	0.10158092	0.048401258	1.713444457
Subsaharan Africa	Angola	AGO	1986	9321000	0	1641	0.886891059	P	Phosphorus	mg	0.748475946	0.619976382	20.35349378
Subsaharan Africa	Angola	AGO	1986	9321000	0	1641	0.886891059	MG	Magnesium	mg	0.282425354	0.220349656	12.99012427
Subsaharan Africa	Angola	AGO	1986	9321000	0	1641	0.886891059	CU	Copper	mcg	0.000929686	0.000557051	7.964632279
Subsaharan Africa	Angola	AGO	1986	9321000	0	1641	0.886891059	VITB12	Vitamin B12	mcg	3.87E-06	1.57E-06	8.79322428
Subsaharan Africa	Angola	AGO	1986	9321000	0	1641	0.886891059	VITB6A	Vitamin B6	mg	0.001196172	0.000897634	9.170437496
Subsaharan Africa	Angola	AGO	1986	9321000	0	1641	0.886891059	VITA_RAE	Vitamin A	mcg	0.000218533	0.000453169	93.10537082
Subsaharan Africa	Angola	AGO	1986	9321000	0	1641	0.886891059	CA	Calcium	mg	0.504072225	0.771953196	87.63073718
Subsaharan Africa	Angola	AGO	1986	9321000	0	1641	0.886891059	FOL	Folate	mcg	0.000188422	0.000261888	82.51268731
Subsaharan Africa	Angola	AGO	1986	9321000	0	1641	0.886891059	THIA	Thiamin	mg	0.000672644	0.000766272	65.81022688
Subsaharan Africa	Angola	AGO	1986	9321000	0	1641	0.886891059	RIBF	Riboflavin	mg	0.000708539	0.000809951	66.17914971
Subsaharan Africa	Angola	AGO	1986	9321000	0	1641	0.886891059	ZN	Zinc	mg	0.001644021	0.00171738	56.78346268
Subsaharan Africa	Angola	AGO	1987	9561000	0	1631	0.889940736	VITA_RAE	Vitamin A	mcg	0.000213216	0.000452786	93.81074123
Subsaharan Africa	Angola	AGO	1987	9561000	0	1631	0.889940736	VITC	Vitamin C	mg	0.100147501	0.048338756	1.86092774
Subsaharan Africa	Angola	AGO	1987	9561000	0	1631	0.889940736	CA	Calcium	mg	0.508463118	0.771454388	87.20936893
Subsaharan Africa	Angola	AGO	1987	9561000	0	1631	0.889940736	THIA	Thiamin	mg	0.000662259	0.000765626	67.36575728
Subsaharan Africa	Angola	AGO	1987	9561000	0	1631	0.889940736	VITB6A	Vitamin B6	mg	0.00117953	0.000896662	10.34969888
Subsaharan Africa	Angola	AGO	1987	9561000	0	1631	0.889940736	CU	Copper	mcg	0.000916509	0.000556562	8.437069238
Subsaharan Africa	Angola	AGO	1987	9561000	0	1631	0.889940736	P	Phosphorus	mg	0.730359522	0.619845059	23.78688107
Subsaharan Africa	Angola	AGO	1987	9561000	0	1631	0.889940736	RIBF	Riboflavin	mg	0.000716986	0.000809289	64.80943523
Subsaharan Africa	Angola	AGO	1987	9561000	0	1631	0.889940736	NIA	Niacin	mg	0.01018231	0.009264954	34.60324972
Subsaharan Africa	Angola	AGO	1987	9561000	0	1631	0.889940736	FE	Iron	mg	0.005977088	0.007055758	59.40698584
Subsaharan Africa	Angola	AGO	1987	9561000	0	1631	0.889940736	FOL	Folate	mcg	0.000181725	0.00026167	84.57542964
Subsaharan Africa	Angola	AGO	1987	9561000	0	1631	0.889940736	VITB12	Vitamin B12	mcg	3.57E-06	1.57E-06	9.884203732
Subsaharan Africa	Angola	AGO	1987	9561000	0	1631	0.889940736	MG	Magnesium	mg	0.269835288	0.220058756	18.2789333
Subsaharan Africa	Angola	AGO	1987	9561000	0	1631	0.889940736	ZN	Zinc	mg	0.001716453	0.001715417	49.90364175
Subsaharan Africa	Angola	AGO	1988	9798000	0	1607	0.895554515	NIA	Niacin	mg	0.009586389	0.009261969	44.42872019
Subsaharan Africa	Angola	AGO	1988	9798000	0	1607	0.895554515	CU	Copper	mcg	0.00090096	0.000556367	9.057450369
Subsaharan Africa	Angola	AGO	1988	9798000	0	1607	0.895554515	ZN	Zinc	mg	0.001743406	0.001714562	47.31742941
Subsaharan Africa	Angola	AGO	1988	9798000	0	1607	0.895554515	VITC	Vitamin C	mg	0.09974759	0.048309308	1.901392707
Subsaharan Africa	Angola	AGO	1988	9798000	0	1607	0.895554515	THIA	Thiamin	mg	0.000639402	0.000765347	70.83360627
Subsaharan Africa	Angola	AGO	1988	9798000	0	1607	0.895554515	CA	Calcium	mg	0.51293622	0.771359038	86.79477725
Subsaharan Africa	Angola	AGO	1988	9798000	0	1607	0.895554515	MG	Magnesium	mg	0.261439535	0.219941092	22.5208729
Subsaharan Africa	Angola	AGO	1988	9798000	0	1607	0.895554515	P	Phosphorus	mg	0.714853359	0.620069714	27.04546157
Subsaharan Africa	Angola	AGO	1988	9798000	0	1607	0.895554515	VITB6A	Vitamin B6	mg	0.001148173	0.000896146	13.03076192
Subsaharan Africa	Angola	AGO	1988	9798000	0	1607	0.895554515	FOL	Folate	mcg	0.000192015	0.000261579	81.23152042
Subsaharan Africa	Angola	AGO	1988	9798000	0	1607	0.895554515	FE	Iron	mg	0.005798644	0.007054849	62.41376428
Subsaharan Africa	Angola	AGO	1988	9798000	0	1607	0.895554515	VITA_RAE	Vitamin A	mcg	0.000216218	0.000452629	93.39292814
Subsaharan Africa	Angola	AGO	1988	9798000	0	1607	0.895554515	RIBF	Riboflavin	mg	0.000704164	0.000809034	66.7158099
Subsaharan Africa	Angola	AGO	1988	9798000	0	1607	0.895554515	VITB12	Vitamin B12	mcg	3.79E-06	1.57E-06	9.053725529
Subsaharan Africa	Angola	AGO	1989	10051000	0	1587	0.913923739	FOL	Folate	mcg	0.000193326	0.000261583	80.77925277
Subsaharan Africa	Angola	AGO	1989	10051000	0	1587	0.913923739	MG	Magnesium	mg	0.249530944	0.21994581	29.52733179
Subsaharan Africa	Angola	AGO	1989	10051000	0	1587	0.913923739	NIA	Niacin	mg	0.009763317	0.00926226	41.43432756
Subsaharan Africa	Angola	AGO	1989	10051000	0	1587	0.913923739	VITC	Vitamin C	mg	0.101473228	0.048305355	1.70330487
Subsaharan Africa	Angola	AGO	1989	10051000	0	1587	0.913923739	THIA	Thiamin	mg	0.000652421	0.000765338	68.85683545
Subsaharan Africa	Angola	AGO	1989	10051000	0	1587	0.913923739	CA	Calcium	mg	0.543637891	0.77149159	83.75584003
Subsaharan Africa	Angola	AGO	1989	10051000	0	1587	0.913923739	RIBF	Riboflavin	mg	0.000734264	0.000809071	62.1035243
Subsaharan Africa	Angola	AGO	1989	10051000	0	1587	0.913923739	FE	Iron	mg	0.006225057	0.007057191	55.29195525
Subsaharan Africa	Angola	AGO	1989	10051000	0	1587	0.913923739	VITB6A	Vitamin B6	mg	0.001114934	0.00089599	16.41763944
Subsaharan Africa	Angola	AGO	1989	10051000	0	1587	0.913923739	CU	Copper	mcg	0.000875345	0.000556382	10.20427552
Subsaharan Africa	Angola	AGO	1989	10051000	0	1587	0.913923739	VITA_RAE	Vitamin A	mcg	0.000212565	0.000452638	93.88800871
Subsaharan Africa	Angola	AGO	1989	10051000	0	1587	0.913923739	ZN	Zinc	mg	0.001795005	0.001714551	42.55565452
Subsaharan Africa	Angola	AGO	1989	10051000	0	1587	0.913923739	P	Phosphorus	mg	0.686150005	0.620455916	33.59574456
Subsaharan Africa	Angola	AGO	1989	10051000	0	1587	0.913923739	VITB12	Vitamin B12	mcg	3.51E-06	1.57E-06	10.13140045
Subsaharan Africa	Angola	AGO	1990	10334000	0	1640	0.887587106	P	Phosphorus	mg	0.683735744	0.620592758	34.20095024
Subsaharan Africa	Angola	AGO	1990	10334000	0	1640	0.887587106	RIBF	Riboflavin	mg	0.000698734	0.000809556	67.59150759
Subsaharan Africa	Angola	AGO	1990	10334000	0	1640	0.887587106	VITB12	Vitamin B12	mcg	2.97E-06	1.57E-06	12.86622419
Subsaharan Africa	Angola	AGO	1990	10334000	0	1640	0.887587106	VITC	Vitamin C	mg	0.097059553	0.048350806	2.267379048
Subsaharan Africa	Angola	AGO	1990	10334000	0	1640	0.887587106	MG	Magnesium	mg	0.252754889	0.220150043	27.67875867
Subsaharan Africa	Angola	AGO	1990	10334000	0	1640	0.887587106	CA	Calcium	mg	0.520155428	0.772253965	86.17356398
Subsaharan Africa	Angola	AGO	1990	10334000	0	1640	0.887587106	ZN	Zinc	mg	0.001728718	0.001715891	48.80721367
Subsaharan Africa	Angola	AGO	1990	10334000	0	1640	0.887587106	THIA	Thiamin	mg	0.000631094	0.0007658	72.11767542
Subsaharan Africa	Angola	AGO	1990	10334000	0	1640	0.887587106	VITA_RAE	Vitamin A	mcg	0.00021114	0.000452914	94.09174203
Subsaharan Africa	Angola	AGO	1990	10334000	0	1640	0.887587106	NIA	Niacin	mg	0.009248546	0.009267967	50.33438708
Subsaharan Africa	Angola	AGO	1990	10334000	0	1640	0.887587106	VITB6A	Vitamin B6	mg	0.001107195	0.000896988	17.4278589
Subsaharan Africa	Angola	AGO	1990	10334000	0	1640	0.887587106	FOL	Folate	mcg	0.00018772	0.00026175	82.70955768
Subsaharan Africa	Angola	AGO	1990	10334000	0	1640	0.887587106	CU	Copper	mcg	0.000902898	0.000556766	9.003178718
Subsaharan Africa	Angola	AGO	1990	10334000	0	1640	0.887587106	FE	Iron	mg	0.006105773	0.007056805	57.26481857
Subsaharan Africa	Angola	AGO	1991	10653000	0	1613	0.86063467	MG	Magnesium	mg	0.249819361	0.21980504	29.2464592
Subsaharan Africa	Angola	AGO	1991	10653000	0	1613	0.86063467	FOL	Folate	mcg	0.000181532	0.000261493	84.59666402
Subsaharan Africa	Angola	AGO	1991	10653000	0	1613	0.86063467	CA	Calcium	mg	0.467546292	0.771673087	90.55283832
Subsaharan Africa	Angola	AGO	1991	10653000	0	1613	0.86063467	P	Phosphorus	mg	0.640264998	0.620470472	44.92288932
Subsaharan Africa	Angola	AGO	1991	10653000	0	1613	0.86063467	RIBF	Riboflavin	mg	0.000609849	0.00080874	79.38225257
Subsaharan Africa	Angola	AGO	1991	10653000	0	1613	0.86063467	ZN	Zinc	mg	0.001613206	0.001713535	59.25870427
Subsaharan Africa	Angola	AGO	1991	10653000	0	1613	0.86063467	FE	Iron	mg	0.005513388	0.007049989	67.20268396
Subsaharan Africa	Angola	AGO	1991	10653000	0	1613	0.86063467	VITB6A	Vitamin B6	mg	0.001047724	0.000895842	24.88340997
Subsaharan Africa	Angola	AGO	1991	10653000	0	1613	0.86063467	VITC	Vitamin C	mg	0.097950639	0.048273738	2.121496487
Subsaharan Africa	Angola	AGO	1991	10653000	0	1613	0.86063467	NIA	Niacin	mg	0.008481614	0.009258472	63.14253491
Subsaharan Africa	Angola	AGO	1991	10653000	0	1613	0.86063467	VITB12	Vitamin B12	mcg	1.95E-06	1.57E-06	21.80908488
Subsaharan Africa	Angola	AGO	1991	10653000	0	1613	0.86063467	VITA_RAE	Vitamin A	mcg	0.000189688	0.000452448	96.48226249
Subsaharan Africa	Angola	AGO	1991	10653000	0	1613	0.86063467	CU	Copper	mcg	0.000871502	0.000556158	10.37102778
Subsaharan Africa	Angola	AGO	1991	10653000	0	1613	0.86063467	THIA	Thiamin	mg	0.000600879	0.000765022	76.27571691
Subsaharan Africa	Angola	AGO	1992	11003000	0	1625	0.85963539	P	Phosphorus	mg	0.640882352	0.62083692	44.8619073
Subsaharan Africa	Angola	AGO	1992	11003000	0	1625	0.85963539	NIA	Niacin	mg	0.00857965	0.009255808	61.49367463
Subsaharan Africa	Angola	AGO	1992	11003000	0	1625	0.85963539	CU	Copper	mcg	0.000902706	0.000555973	8.957375733
Subsaharan Africa	Angola	AGO	1992	11003000	0	1625	0.85963539	RIBF	Riboflavin	mg	0.000602856	0.000808496	80.17326769
Subsaharan Africa	Angola	AGO	1992	11003000	0	1625	0.85963539	FE	Iron	mg	0.005674363	0.007049896	64.45996354
Subsaharan Africa	Angola	AGO	1992	11003000	0	1625	0.85963539	VITB12	Vitamin B12	mcg	1.78E-06	1.57E-06	24.19692494
Subsaharan Africa	Angola	AGO	1992	11003000	0	1625	0.85963539	THIA	Thiamin	mg	0.000599882	0.000764776	76.38385729
Subsaharan Africa	Angola	AGO	1992	11003000	0	1625	0.85963539	VITC	Vitamin C	mg	0.102541424	0.048243199	1.578503425
Subsaharan Africa	Angola	AGO	1992	11003000	0	1625	0.85963539	ZN	Zinc	mg	0.001649951	0.001712721	55.82751656
Subsaharan Africa	Angola	AGO	1992	11003000	0	1625	0.85963539	VITA_RAE	Vitamin A	mcg	0.00016878	0.000452294	98.12734861
Subsaharan Africa	Angola	AGO	1992	11003000	0	1625	0.85963539	MG	Magnesium	mg	0.253874738	0.21972087	26.70471144
Subsaharan Africa	Angola	AGO	1992	11003000	0	1625	0.85963539	VITB6A	Vitamin B6	mg	0.001074124	0.000895302	21.2164632
Subsaharan Africa	Angola	AGO	1992	11003000	0	1625	0.85963539	CA	Calcium	mg	0.466856516	0.771678377	90.60312566
Subsaharan Africa	Angola	AGO	1992	11003000	0	1625	0.85963539	FOL	Folate	mcg	0.000189152	0.000261412	82.15790977
Subsaharan Africa	Angola	AGO	1993	11372000	0	1563	0.843968819	RIBF	Riboflavin	mg	0.000553972	0.000808644	85.30929207
Subsaharan Africa	Angola	AGO	1993	11372000	0	1563	0.843968819	NIA	Niacin	mg	0.008083753	0.009257706	69.4004163
Subsaharan Africa	Angola	AGO	1993	11372000	0	1563	0.843968819	FOL	Folate	mcg	0.000186062	0.000261453	83.17674061
Subsaharan Africa	Angola	AGO	1993	11372000	0	1563	0.843968819	P	Phosphorus	mg	0.62347626	0.621474614	49.48604871
Subsaharan Africa	Angola	AGO	1993	11372000	0	1563	0.843968819	CA	Calcium	mg	0.442943744	0.772028681	92.23222323
Subsaharan Africa	Angola	AGO	1993	11372000	0	1563	0.843968819	ZN	Zinc	mg	0.001561325	0.001712998	63.83939249
Subsaharan Africa	Angola	AGO	1993	11372000	0	1563	0.843968819	FE	Iron	mg	0.004331068	0.007054349	85.85061837
Subsaharan Africa	Angola	AGO	1993	11372000	0	1563	0.843968819	THIA	Thiamin	mg	0.000572654	0.000764894	79.8918374
Subsaharan Africa	Angola	AGO	1993	11372000	0	1563	0.843968819	VITA_RAE	Vitamin A	mcg	0.00016647	0.00045236	98.27087756
Subsaharan Africa	Angola	AGO	1993	11372000	0	1563	0.843968819	CU	Copper	mcg	0.000858538	0.000556073	11.00724211
Subsaharan Africa	Angola	AGO	1993	11372000	0	1563	0.843968819	MG	Magnesium	mg	0.25069286	0.219807683	28.70443814
Subsaharan Africa	Angola	AGO	1993	11372000	0	1563	0.843968819	VITB12	Vitamin B12	mcg	1.74E-06	1.57E-06	24.81882141
Subsaharan Africa	Angola	AGO	1993	11372000	0	1563	0.843968819	VITC	Vitamin C	mg	0.098363822	0.048245776	2.059021198
Subsaharan Africa	Angola	AGO	1993	11372000	0	1563	0.843968819	VITB6A	Vitamin B6	mg	0.00102399	0.000895197	28.24814245
Subsaharan Africa	Angola	AGO	1994	11743000	0	1639	0.866290139	VITB6A	Vitamin B6	mg	0.001074419	0.000895399	21.19323969
Subsaharan Africa	Angola	AGO	1994	11743000	0	1639	0.866290139	ZN	Zinc	mg	0.001621431	0.001714028	58.55420882
Subsaharan Africa	Angola	AGO	1994	11743000	0	1639	0.866290139	RIBF	Riboflavin	mg	0.000597281	0.000809048	80.85307748
Subsaharan Africa	Angola	AGO	1994	11743000	0	1639	0.866290139	VITB12	Vitamin B12	mcg	1.61E-06	1.57E-06	26.96699694
Subsaharan Africa	Angola	AGO	1994	11743000	0	1639	0.866290139	CA	Calcium	mg	0.487308333	0.772516752	89.07723728
Subsaharan Africa	Angola	AGO	1994	11743000	0	1639	0.866290139	P	Phosphorus	mg	0.672305669	0.622171174	37.36052839
Subsaharan Africa	Angola	AGO	1994	11743000	0	1639	0.866290139	NIA	Niacin	mg	0.008534732	0.009262435	62.33382309
Subsaharan Africa	Angola	AGO	1994	11743000	0	1639	0.866290139	VITC	Vitamin C	mg	0.112359371	0.04827201	0.852560943
Subsaharan Africa	Angola	AGO	1994	11743000	0	1639	0.866290139	VITA_RAE	Vitamin A	mcg	0.000158095	0.000452573	98.72757965
Subsaharan Africa	Angola	AGO	1994	11743000	0	1639	0.866290139	THIA	Thiamin	mg	0.000639489	0.000765248	70.80824337
Subsaharan Africa	Angola	AGO	1994	11743000	0	1639	0.866290139	MG	Magnesium	mg	0.278304477	0.219996158	14.45336858
Subsaharan Africa	Angola	AGO	1994	11743000	0	1639	0.866290139	FOL	Folate	mcg	0.000238622	0.000261575	61.50476898
Subsaharan Africa	Angola	AGO	1994	11743000	0	1639	0.866290139	FE	Iron	mg	0.005023495	0.007061668	75.53276938
Subsaharan Africa	Angola	AGO	1994	11743000	0	1639	0.866290139	CU	Copper	mcg	0.000974815	0.000556356	6.416159789
Subsaharan Africa	Angola	AGO	1995	12105000	0	1684	0.859415722	VITB12	Vitamin B12	mcg	1.68E-06	1.57E-06	25.84762543
Subsaharan Africa	Angola	AGO	1995	12105000	0	1684	0.859415722	VITA_RAE	Vitamin A	mcg	0.000162096	0.000452894	98.52958883
Subsaharan Africa	Angola	AGO	1995	12105000	0	1684	0.859415722	VITC	Vitamin C	mg	0.114553853	0.048317474	0.747959645
Subsaharan Africa	Angola	AGO	1995	12105000	0	1684	0.859415722	FE	Iron	mg	0.005092203	0.007070861	74.52020959
Subsaharan Africa	Angola	AGO	1995	12105000	0	1684	0.859415722	MG	Magnesium	mg	0.279485395	0.220246553	14.09940098
Subsaharan Africa	Angola	AGO	1995	12105000	0	1684	0.859415722	CU	Copper	mcg	0.00097358	0.000556761	6.474755284
Subsaharan Africa	Angola	AGO	1995	12105000	0	1684	0.859415722	NIA	Niacin	mg	0.00871444	0.009269007	59.45717648
Subsaharan Africa	Angola	AGO	1995	12105000	0	1684	0.859415722	THIA	Thiamin	mg	0.000643339	0.000765769	70.29577449
Subsaharan Africa	Angola	AGO	1995	12105000	0	1684	0.859415722	VITB6A	Vitamin B6	mg	0.00108507	0.000895849	19.90884316
Subsaharan Africa	Angola	AGO	1995	12105000	0	1684	0.859415722	FOL	Folate	mcg	0.000237124	0.000261754	62.31069664
Subsaharan Africa	Angola	AGO	1995	12105000	0	1684	0.859415722	ZN	Zinc	mg	0.00160078	0.001715631	60.55640203
Subsaharan Africa	Angola	AGO	1995	12105000	0	1684	0.859415722	RIBF	Riboflavin	mg	0.000606516	0.000809627	79.84878795
Subsaharan Africa	Angola	AGO	1995	12105000	0	1684	0.859415722	CA	Calcium	mg	0.499597149	0.772996802	88.07929139
Subsaharan Africa	Angola	AGO	1995	12105000	0	1684	0.859415722	P	Phosphorus	mg	0.670408279	0.622749605	37.97575053
Subsaharan Africa	Angola	AGO	1996	12452000	0	1728	0.85208577	ZN	Zinc	mg	0.001595258	0.001714177	60.93002369
Subsaharan Africa	Angola	AGO	1996	12452000	0	1728	0.85208577	FOL	Folate	mcg	0.000232523	0.000261592	64.44612395
Subsaharan Africa	Angola	AGO	1996	12452000	0	1728	0.85208577	VITC	Vitamin C	mg	0.108859547	0.048268759	1.062147874
Subsaharan Africa	Angola	AGO	1996	12452000	0	1728	0.85208577	VITB6A	Vitamin B6	mg	0.001107094	0.00089506	17.16725812
Subsaharan Africa	Angola	AGO	1996	12452000	0	1728	0.85208577	CU	Copper	mcg	0.000983411	0.000556377	6.16460804
Subsaharan Africa	Angola	AGO	1996	12452000	0	1728	0.85208577	VITB12	Vitamin B12	mcg	1.61E-06	1.57E-06	26.87662302
Subsaharan Africa	Angola	AGO	1996	12452000	0	1728	0.85208577	THIA	Thiamin	mg	0.000669514	0.000765284	66.1713021
Subsaharan Africa	Angola	AGO	1996	12452000	0	1728	0.85208577	CA	Calcium	mg	0.485913896	0.772629713	89.19507974
Subsaharan Africa	Angola	AGO	1996	12452000	0	1728	0.85208577	FE	Iron	mg	0.005091548	0.007067514	74.4914551
Subsaharan Africa	Angola	AGO	1996	12452000	0	1728	0.85208577	NIA	Niacin	mg	0.009061818	0.009263095	53.46306384
Subsaharan Africa	Angola	AGO	1996	12452000	0	1728	0.85208577	P	Phosphorus	mg	0.698857097	0.622718867	31.2396181
Subsaharan Africa	Angola	AGO	1996	12452000	0	1728	0.85208577	VITA_RAE	Vitamin A	mcg	0.000167352	0.000452603	98.22306272
Subsaharan Africa	Angola	AGO	1996	12452000	0	1728	0.85208577	MG	Magnesium	mg	0.290905641	0.220037325	9.882142664
Subsaharan Africa	Angola	AGO	1996	12452000	0	1728	0.85208577	RIBF	Riboflavin	mg	0.000613481	0.00080912	78.98713937
Subsaharan Africa	Angola	AGO	1997	12791000	0	1730	0.861015278	CU	Copper	mcg	0.000998882	0.00055632	5.731850512
Subsaharan Africa	Angola	AGO	1997	12791000	0	1730	0.861015278	VITB12	Vitamin B12	mcg	1.57E-06	1.57E-06	27.5567099
Subsaharan Africa	Angola	AGO	1997	12791000	0	1730	0.861015278	NIA	Niacin	mg	0.009265133	0.009262438	49.95355926
Subsaharan Africa	Angola	AGO	1997	12791000	0	1730	0.861015278	P	Phosphorus	mg	0.722783937	0.623012736	26.09002461
Subsaharan Africa	Angola	AGO	1997	12791000	0	1730	0.861015278	FOL	Folate	mcg	0.000242726	0.000261565	59.48654431
Subsaharan Africa	Angola	AGO	1997	12791000	0	1730	0.861015278	MG	Magnesium	mg	0.30049903	0.220022633	7.172593307
Subsaharan Africa	Angola	AGO	1997	12791000	0	1730	0.861015278	CA	Calcium	mg	0.484590029	0.772670465	89.30276225
Subsaharan Africa	Angola	AGO	1997	12791000	0	1730	0.861015278	VITC	Vitamin C	mg	0.100906472	0.048257291	1.75443153
Subsaharan Africa	Angola	AGO	1997	12791000	0	1730	0.861015278	FE	Iron	mg	0.005196263	0.007069371	72.78790354
Subsaharan Africa	Angola	AGO	1997	12791000	0	1730	0.861015278	VITB6A	Vitamin B6	mg	0.001116788	0.000894738	16.04303891
Subsaharan Africa	Angola	AGO	1997	12791000	0	1730	0.861015278	ZN	Zinc	mg	0.001610439	0.001713937	59.54328238
Subsaharan Africa	Angola	AGO	1997	12791000	0	1730	0.861015278	THIA	Thiamin	mg	0.000693463	0.000765208	62.26813377
Subsaharan Africa	Angola	AGO	1997	12791000	0	1730	0.861015278	RIBF	Riboflavin	mg	0.000629285	0.000809061	77.05562622
Subsaharan Africa	Angola	AGO	1997	12791000	0	1730	0.861015278	VITA_RAE	Vitamin A	mcg	0.000167349	0.000452558	98.2222178
Subsaharan Africa	Angola	AGO	1998	13138000	0	1751	0.847296799	MG	Magnesium	mg	0.292937031	0.220149812	9.300028784
Subsaharan Africa	Angola	AGO	1998	13138000	0	1751	0.847296799	NIA	Niacin	mg	0.009305493	0.00926569	49.31453307
Subsaharan Africa	Angola	AGO	1998	13138000	0	1751	0.847296799	FOL	Folate	mcg	0.000219478	0.000261643	70.44299438
Subsaharan Africa	Angola	AGO	1998	13138000	0	1751	0.847296799	ZN	Zinc	mg	0.00162041	0.001714643	58.6998045
Subsaharan Africa	Angola	AGO	1998	13138000	0	1751	0.847296799	RIBF	Riboflavin	mg	0.000632333	0.000809342	76.70062327
Subsaharan Africa	Angola	AGO	1998	13138000	0	1751	0.847296799	CA	Calcium	mg	0.48685813	0.772991506	89.1375986
Subsaharan Africa	Angola	AGO	1998	13138000	0	1751	0.847296799	CU	Copper	mcg	0.000984386	0.000556511	6.143351982
Subsaharan Africa	Angola	AGO	1998	13138000	0	1751	0.847296799	FE	Iron	mg	0.005069137	0.007075016	74.94551298
Subsaharan Africa	Angola	AGO	1998	13138000	0	1751	0.847296799	VITC	Vitamin C	mg	0.108086277	0.048274992	1.116230341
Subsaharan Africa	Angola	AGO	1998	13138000	0	1751	0.847296799	VITB6A	Vitamin B6	mg	0.001119372	0.000894803	15.77183171
Subsaharan Africa	Angola	AGO	1998	13138000	0	1751	0.847296799	THIA	Thiamin	mg	0.000668544	0.000765443	66.34775713
Subsaharan Africa	Angola	AGO	1998	13138000	0	1751	0.847296799	VITA_RAE	Vitamin A	mcg	0.000171968	0.000452703	97.92909873
Subsaharan Africa	Angola	AGO	1998	13138000	0	1751	0.847296799	VITB12	Vitamin B12	mcg	1.52E-06	1.57E-06	28.50962627
Subsaharan Africa	Angola	AGO	1998	13138000	0	1751	0.847296799	P	Phosphorus	mg	0.7089924	0.623512093	29.17156862
Subsaharan Africa	Angola	AGO	1999	13511000	0	1804	0.825519648	P	Phosphorus	mg	0.722015538	0.623976334	26.48446829
Subsaharan Africa	Angola	AGO	1999	13511000	0	1804	0.825519648	RIBF	Riboflavin	mg	0.000621419	0.000809751	78.09085675
Subsaharan Africa	Angola	AGO	1999	13511000	0	1804	0.825519648	VITC	Vitamin C	mg	0.104867882	0.048305882	1.373846072
Subsaharan Africa	Angola	AGO	1999	13511000	0	1804	0.825519648	MG	Magnesium	mg	0.300324645	0.220321335	7.318352008
Subsaharan Africa	Angola	AGO	1999	13511000	0	1804	0.825519648	FOL	Folate	mcg	0.000203185	0.000261764	77.2153515
Subsaharan Africa	Angola	AGO	1999	13511000	0	1804	0.825519648	FE	Iron	mg	0.004982876	0.00708172	76.41714645
Subsaharan Africa	Angola	AGO	1999	13511000	0	1804	0.825519648	ZN	Zinc	mg	0.001558677	0.001715757	64.28942064
Subsaharan Africa	Angola	AGO	1999	13511000	0	1804	0.825519648	NIA	Niacin	mg	0.009512883	0.009270279	45.83147678
Subsaharan Africa	Angola	AGO	1999	13511000	0	1804	0.825519648	CU	Copper	mcg	0.000981785	0.000556791	6.232853262
Subsaharan Africa	Angola	AGO	1999	13511000	0	1804	0.825519648	THIA	Thiamin	mg	0.000659904	0.000765798	67.75755634
Subsaharan Africa	Angola	AGO	1999	13511000	0	1804	0.825519648	VITB6A	Vitamin B6	mg	0.001110364	0.000895071	16.79924764
Subsaharan Africa	Angola	AGO	1999	13511000	0	1804	0.825519648	CA	Calcium	mg	0.473506115	0.773344164	90.18884711
Subsaharan Africa	Angola	AGO	1999	13511000	0	1804	0.825519648	VITB12	Vitamin B12	mcg	1.88E-06	1.57E-06	22.85499219
Subsaharan Africa	Angola	AGO	1999	13511000	0	1804	0.825519648	VITA_RAE	Vitamin A	mcg	0.000165887	0.000452927	98.31777319
Subsaharan Africa	Angola	AGO	2000	13925000	0	1789	0.844830076	NIA	Niacin	mg	0.009806073	0.009273098	40.90841604
Subsaharan Africa	Angola	AGO	2000	13925000	0	1789	0.844830076	FOL	Folate	mcg	0.000220963	0.000261854	69.86528504
Subsaharan Africa	Angola	AGO	2000	13925000	0	1789	0.844830076	MG	Magnesium	mg	0.302631811	0.220420176	6.786168204
Subsaharan Africa	Angola	AGO	2000	13925000	0	1789	0.844830076	ZN	Zinc	mg	0.001646597	0.001716632	56.48159248
Subsaharan Africa	Angola	AGO	2000	13925000	0	1789	0.844830076	P	Phosphorus	mg	0.735576925	0.624091297	23.74445281
Subsaharan Africa	Angola	AGO	2000	13925000	0	1789	0.844830076	RIBF	Riboflavin	mg	0.000639297	0.000810028	75.88389815
Subsaharan Africa	Angola	AGO	2000	13925000	0	1789	0.844830076	CU	Copper	mcg	0.001018435	0.000556971	5.260415983
Subsaharan Africa	Angola	AGO	2000	13925000	0	1789	0.844830076	CA	Calcium	mg	0.476480855	0.773409682	89.96815789
Subsaharan Africa	Angola	AGO	2000	13925000	0	1789	0.844830076	VITA_RAE	Vitamin A	mcg	0.000172723	0.000453092	97.88784752
Subsaharan Africa	Angola	AGO	2000	13925000	0	1789	0.844830076	FE	Iron	mg	0.00524159	0.007086297	72.24296271
Subsaharan Africa	Angola	AGO	2000	13925000	0	1789	0.844830076	VITC	Vitamin C	mg	0.10686459	0.048330856	1.215193759
Subsaharan Africa	Angola	AGO	2000	13925000	0	1789	0.844830076	VITB12	Vitamin B12	mcg	1.96E-06	1.57E-06	21.8008866
Subsaharan Africa	Angola	AGO	2000	13925000	0	1789	0.844830076	VITB6A	Vitamin B6	mg	0.001140858	0.000895301	13.63007746
Subsaharan Africa	Angola	AGO	2000	13925000	0	1789	0.844830076	THIA	Thiamin	mg	0.000680337	0.000766045	64.54053233
Subsaharan Africa	Angola	AGO	2001	14385000	0	1833	0.849285539	FE	Iron	mg	0.0054743	0.007079566	68.25536438
Subsaharan Africa	Angola	AGO	2001	14385000	0	1833	0.849285539	VITB12	Vitamin B12	mcg	1.96E-06	1.57E-06	21.75859518
Subsaharan Africa	Angola	AGO	2001	14385000	0	1833	0.849285539	RIBF	Riboflavin	mg	0.000672157	0.000809409	71.40432687
Subsaharan Africa	Angola	AGO	2001	14385000	0	1833	0.849285539	THIA	Thiamin	mg	0.000714527	0.000765469	58.77790551
Subsaharan Africa	Angola	AGO	2001	14385000	0	1833	0.849285539	P	Phosphorus	mg	0.76385764	0.623715564	18.43912357
Subsaharan Africa	Angola	AGO	2001	14385000	0	1833	0.849285539	MG	Magnesium	mg	0.309651894	0.220149703	5.195292309
Subsaharan Africa	Angola	AGO	2001	14385000	0	1833	0.849285539	VITB6A	Vitamin B6	mg	0.001238217	0.000894543	6.217606339
Subsaharan Africa	Angola	AGO	2001	14385000	0	1833	0.849285539	NIA	Niacin	mg	0.01027463	0.009265765	33.15911879
Subsaharan Africa	Angola	AGO	2001	14385000	0	1833	0.849285539	VITA_RAE	Vitamin A	mcg	0.000175886	0.000452749	97.65440189
Subsaharan Africa	Angola	AGO	2001	14385000	0	1833	0.849285539	CU	Copper	mcg	0.001067901	0.000556504	4.159135305
Subsaharan Africa	Angola	AGO	2001	14385000	0	1833	0.849285539	CA	Calcium	mg	0.490785082	0.772842	88.81095011
Subsaharan Africa	Angola	AGO	2001	14385000	0	1833	0.849285539	FOL	Folate	mcg	0.000228138	0.000261661	66.5330347
Subsaharan Africa	Angola	AGO	2001	14385000	0	1833	0.849285539	VITC	Vitamin C	mg	0.11098954	0.048277831	0.930009132
Subsaharan Africa	Angola	AGO	2001	14385000	0	1833	0.849285539	ZN	Zinc	mg	0.001690583	0.001714963	52.26735988
Subsaharan Africa	Angola	AGO	2002	14887000	0	1916	0.848228396	CU	Copper	mcg	0.00112055	0.000556278	3.248049748
Subsaharan Africa	Angola	AGO	2002	14887000	0	1916	0.848228396	FE	Iron	mg	0.005742618	0.007076114	63.65979192
Subsaharan Africa	Angola	AGO	2002	14887000	0	1916	0.848228396	CA	Calcium	mg	0.508353966	0.772605932	87.28754851
Subsaharan Africa	Angola	AGO	2002	14887000	0	1916	0.848228396	MG	Magnesium	mg	0.324978594	0.220024917	2.819350303
Subsaharan Africa	Angola	AGO	2002	14887000	0	1916	0.848228396	VITA_RAE	Vitamin A	mcg	0.000168398	0.000452584	98.15811258
Subsaharan Africa	Angola	AGO	2002	14887000	0	1916	0.848228396	NIA	Niacin	mg	0.010894439	0.009262309	24.04524456
Subsaharan Africa	Angola	AGO	2002	14887000	0	1916	0.848228396	RIBF	Riboflavin	mg	0.000701764	0.000809114	67.0847898
Subsaharan Africa	Angola	AGO	2002	14887000	0	1916	0.848228396	THIA	Thiamin	mg	0.000752995	0.000765195	52.11920672
Subsaharan Africa	Angola	AGO	2002	14887000	0	1916	0.848228396	VITB12	Vitamin B12	mcg	1.80E-06	1.57E-06	23.93925645
Subsaharan Africa	Angola	AGO	2002	14887000	0	1916	0.848228396	FOL	Folate	mcg	0.000244672	0.000261565	58.52299498
Subsaharan Africa	Angola	AGO	2002	14887000	0	1916	0.848228396	ZN	Zinc	mg	0.001736619	0.001714165	47.91063654
Subsaharan Africa	Angola	AGO	2002	14887000	0	1916	0.848228396	VITB6A	Vitamin B6	mg	0.001341983	0.000894147	2.256633413
Subsaharan Africa	Angola	AGO	2002	14887000	0	1916	0.848228396	P	Phosphorus	mg	0.799780475	0.62358878	12.92004575
Subsaharan Africa	Angola	AGO	2002	14887000	0	1916	0.848228396	VITC	Vitamin C	mg	0.11496288	0.048251536	0.721930664
Subsaharan Africa	Angola	AGO	2003	15421000	0	1978	0.84158155	ZN	Zinc	mg	0.001760941	0.001713928	45.63158643
Subsaharan Africa	Angola	AGO	2003	15421000	0	1978	0.84158155	MG	Magnesium	mg	0.328490593	0.219987124	2.425314765
Subsaharan Africa	Angola	AGO	2003	15421000	0	1978	0.84158155	P	Phosphorus	mg	0.794482969	0.623588877	13.64962459
Subsaharan Africa	Angola	AGO	2003	15421000	0	1978	0.84158155	CU	Copper	mcg	0.001158024	0.0005562	2.727434908
Subsaharan Africa	Angola	AGO	2003	15421000	0	1978	0.84158155	VITB6A	Vitamin B6	mg	0.001409085	0.000893996	1.059290718
Subsaharan Africa	Angola	AGO	2003	15421000	0	1978	0.84158155	THIA	Thiamin	mg	0.000762104	0.000765108	50.52217658
Subsaharan Africa	Angola	AGO	2003	15421000	0	1978	0.84158155	VITB12	Vitamin B12	mcg	1.66E-06	1.57E-06	26.14752313
Subsaharan Africa	Angola	AGO	2003	15421000	0	1978	0.84158155	CA	Calcium	mg	0.515613095	0.772553739	86.62030066
Subsaharan Africa	Angola	AGO	2003	15421000	0	1978	0.84158155	VITC	Vitamin C	mg	0.117316946	0.048242607	0.622270354
Subsaharan Africa	Angola	AGO	2003	15421000	0	1978	0.84158155	NIA	Niacin	mg	0.011215783	0.009261228	19.92820152
Subsaharan Africa	Angola	AGO	2003	15421000	0	1978	0.84158155	VITA_RAE	Vitamin A	mcg	0.000166814	0.000452533	98.25406643
Subsaharan Africa	Angola	AGO	2003	15421000	0	1978	0.84158155	FOL	Folate	mcg	0.000252388	0.000261532	54.63903839
Subsaharan Africa	Angola	AGO	2003	15421000	0	1978	0.84158155	RIBF	Riboflavin	mg	0.00070566	0.000809023	66.49012237
Subsaharan Africa	Angola	AGO	2003	15421000	0	1978	0.84158155	FE	Iron	mg	0.005933671	0.007074647	60.40675717
Subsaharan Africa	Angola	AGO	2004	15977000	0	2032	0.828757383	CU	Copper	mcg	0.001200868	0.000556222	2.237676335
Subsaharan Africa	Angola	AGO	2004	15977000	0	2032	0.828757383	FE	Iron	mg	0.005932006	0.007074482	60.43250214
Subsaharan Africa	Angola	AGO	2004	15977000	0	2032	0.828757383	RIBF	Riboflavin	mg	0.000719011	0.000809068	64.46928381
Subsaharan Africa	Angola	AGO	2004	15977000	0	2032	0.828757383	FOL	Folate	mcg	0.000250027	0.000261543	55.8342646
Subsaharan Africa	Angola	AGO	2004	15977000	0	2032	0.828757383	MG	Magnesium	mg	0.338604221	0.220002997	1.552791817
Subsaharan Africa	Angola	AGO	2004	15977000	0	2032	0.828757383	CA	Calcium	mg	0.514637091	0.772588973	86.71313534
Subsaharan Africa	Angola	AGO	2004	15977000	0	2032	0.828757383	THIA	Thiamin	mg	0.000779193	0.000765147	47.56036442
Subsaharan Africa	Angola	AGO	2004	15977000	0	2032	0.828757383	NIA	Niacin	mg	0.01145401	0.009261672	17.18593313
Subsaharan Africa	Angola	AGO	2004	15977000	0	2032	0.828757383	P	Phosphorus	mg	0.81053693	0.623625523	11.5289343
Subsaharan Africa	Angola	AGO	2004	15977000	0	2032	0.828757383	VITA_RAE	Vitamin A	mcg	0.000174061	0.00045256	97.78061761
Subsaharan Africa	Angola	AGO	2004	15977000	0	2032	0.828757383	VITB12	Vitamin B12	mcg	1.57E-06	1.57E-06	27.67349171
Subsaharan Africa	Angola	AGO	2004	15977000	0	2032	0.828757383	ZN	Zinc	mg	0.001735967	0.00171408	47.96326045
Subsaharan Africa	Angola	AGO	2004	15977000	0	2032	0.828757383	VITB6A	Vitamin B6	mg	0.00146981	0.000894028	0.499568414
Subsaharan Africa	Angola	AGO	2004	15977000	0	2032	0.828757383	VITC	Vitamin C	mg	0.120589622	0.048246147	0.507782038
Subsaharan Africa	Angola	AGO	2005	16544000	0	2073	0.834219386	FE	Iron	mg	0.006176993	0.007075165	56.34661147
Subsaharan Africa	Angola	AGO	2005	16544000	0	2073	0.834219386	FOL	Folate	mcg	0.000265026	0.000261585	48.25116528
Subsaharan Africa	Angola	AGO	2005	16544000	0	2073	0.834219386	VITA_RAE	Vitamin A	mcg	0.000172552	0.000452646	97.88793753
Subsaharan Africa	Angola	AGO	2005	16544000	0	2073	0.834219386	VITB12	Vitamin B12	mcg	1.59E-06	1.57E-06	27.19765728
Subsaharan Africa	Angola	AGO	2005	16544000	0	2073	0.834219386	MG	Magnesium	mg	0.345309956	0.220052439	1.139709407
Subsaharan Africa	Angola	AGO	2005	16544000	0	2073	0.834219386	CU	Copper	mcg	0.001220313	0.000556312	2.047714546
Subsaharan Africa	Angola	AGO	2005	16544000	0	2073	0.834219386	P	Phosphorus	mg	0.824695223	0.623608829	9.855590332
Subsaharan Africa	Angola	AGO	2005	16544000	0	2073	0.834219386	RIBF	Riboflavin	mg	0.000752066	0.000809209	59.30443339
Subsaharan Africa	Angola	AGO	2005	16544000	0	2073	0.834219386	NIA	Niacin	mg	0.011957187	0.009263123	12.23436746
Subsaharan Africa	Angola	AGO	2005	16544000	0	2073	0.834219386	VITB6A	Vitamin B6	mg	0.00153364	0.000894209	0.211607193
Subsaharan Africa	Angola	AGO	2005	16544000	0	2073	0.834219386	VITC	Vitamin C	mg	0.119835027	0.048259841	0.533301796
Subsaharan Africa	Angola	AGO	2005	16544000	0	2073	0.834219386	THIA	Thiamin	mg	0.000810888	0.000765275	42.12573961
Subsaharan Africa	Angola	AGO	2005	16544000	0	2073	0.834219386	CA	Calcium	mg	0.524895423	0.772633869	85.74211911
Subsaharan Africa	Angola	AGO	2005	16544000	0	2073	0.834219386	ZN	Zinc	mg	0.001785096	0.001714533	43.46203098
Subsaharan Africa	Angola	AGO	2006	17122000	0	2114	0.836561077	RIBF	Riboflavin	mg	0.000769532	0.000808578	56.39402865
Subsaharan Africa	Angola	AGO	2006	17122000	0	2114	0.836561077	NIA	Niacin	mg	0.012724279	0.009255696	6.693620516
Subsaharan Africa	Angola	AGO	2006	17122000	0	2114	0.836561077	P	Phosphorus	mg	0.844059544	0.623195849	7.815089716
Subsaharan Africa	Angola	AGO	2006	17122000	0	2114	0.836561077	CA	Calcium	mg	0.518139187	0.772083169	86.35390401
Subsaharan Africa	Angola	AGO	2006	17122000	0	2114	0.836561077	CU	Copper	mcg	0.001274294	0.000555838	1.590552958
Subsaharan Africa	Angola	AGO	2006	17122000	0	2114	0.836561077	VITA_RAE	Vitamin A	mcg	0.000179716	0.000452297	97.34801485
Subsaharan Africa	Angola	AGO	2006	17122000	0	2114	0.836561077	THIA	Thiamin	mg	0.000843737	0.000764685	36.51983312
Subsaharan Africa	Angola	AGO	2006	17122000	0	2114	0.836561077	VITB6A	Vitamin B6	mg	0.00163681	0.000893479	0.043766244
Subsaharan Africa	Angola	AGO	2006	17122000	0	2114	0.836561077	VITB12	Vitamin B12	mcg	1.68E-06	1.57E-06	25.7480774
Subsaharan Africa	Angola	AGO	2006	17122000	0	2114	0.836561077	FE	Iron	mg	0.006396344	0.007067043	52.63924336
Subsaharan Africa	Angola	AGO	2006	17122000	0	2114	0.836561077	FOL	Folate	mcg	0.000267582	0.000261382	46.84879599
Subsaharan Africa	Angola	AGO	2006	17122000	0	2114	0.836561077	MG	Magnesium	mg	0.355083361	0.219776715	0.689629623
Subsaharan Africa	Angola	AGO	2006	17122000	0	2114	0.836561077	VITC	Vitamin C	mg	0.126126684	0.048205635	0.358122781
Subsaharan Africa	Angola	AGO	2006	17122000	0	2114	0.836561077	ZN	Zinc	mg	0.00180448	0.001712798	41.52300838
Subsaharan Africa	Angola	AGO	2007	17713000	0	2178	0.856292119	NIA	Niacin	mg	0.013324211	0.009252961	3.920584078
Subsaharan Africa	Angola	AGO	2007	17713000	0	2178	0.856292119	MG	Magnesium	mg	0.361173931	0.21967776	0.499130037
Subsaharan Africa	Angola	AGO	2007	17713000	0	2178	0.856292119	VITB6A	Vitamin B6	mg	0.001766531	0.00089315	0.004586885
Subsaharan Africa	Angola	AGO	2007	17713000	0	2178	0.856292119	FOL	Folate	mcg	0.000281772	0.000261295	39.69602091
Subsaharan Africa	Angola	AGO	2007	17713000	0	2178	0.856292119	FE	Iron	mg	0.008151076	0.007063387	28.62424363
Subsaharan Africa	Angola	AGO	2007	17713000	0	2178	0.856292119	P	Phosphorus	mg	0.871696517	0.623135352	5.529446133
Subsaharan Africa	Angola	AGO	2007	17713000	0	2178	0.856292119	VITB12	Vitamin B12	mcg	1.84E-06	1.57E-06	23.30098458
Subsaharan Africa	Angola	AGO	2007	17713000	0	2178	0.856292119	RIBF	Riboflavin	mg	0.000799951	0.000808336	51.37910698
Subsaharan Africa	Angola	AGO	2007	17713000	0	2178	0.856292119	VITC	Vitamin C	mg	0.132401751	0.048182398	0.242766802
Subsaharan Africa	Angola	AGO	2007	17713000	0	2178	0.856292119	ZN	Zinc	mg	0.001872096	0.001712073	35.42512359
Subsaharan Africa	Angola	AGO	2007	17713000	0	2178	0.856292119	CU	Copper	mcg	0.001326589	0.000555654	1.250643729
Subsaharan Africa	Angola	AGO	2007	17713000	0	2178	0.856292119	THIA	Thiamin	mg	0.000881724	0.000764451	30.45494918
Subsaharan Africa	Angola	AGO	2007	17713000	0	2178	0.856292119	VITA_RAE	Vitamin A	mcg	0.000184712	0.000452157	96.92600644
Subsaharan Africa	Angola	AGO	2007	17713000	0	2178	0.856292119	CA	Calcium	mg	0.5398169	0.771953306	84.1919159
Subsaharan Africa	Angola	AGO	2008	18314000	0	2244	0.870408127	VITC	Vitamin C	mg	0.149534223	0.048187369	0.086790424
Subsaharan Africa	Angola	AGO	2008	18314000	0	2244	0.870408127	FOL	Folate	mcg	0.000302129	0.000261314	30.13088811
Subsaharan Africa	Angola	AGO	2008	18314000	0	2244	0.870408127	VITB6A	Vitamin B6	mg	0.001861318	0.000893194	0.00072697
Subsaharan Africa	Angola	AGO	2008	18314000	0	2244	0.870408127	VITB12	Vitamin B12	mcg	1.99E-06	1.57E-06	21.38249695
Subsaharan Africa	Angola	AGO	2008	18314000	0	2244	0.870408127	NIA	Niacin	mg	0.014185142	0.009254378	1.653575977
Subsaharan Africa	Angola	AGO	2008	18314000	0	2244	0.870408127	FE	Iron	mg	0.008639608	0.007063709	23.71915543
Subsaharan Africa	Angola	AGO	2008	18314000	0	2244	0.870408127	P	Phosphorus	mg	0.922648965	0.623373149	2.740597781
Subsaharan Africa	Angola	AGO	2008	18314000	0	2244	0.870408127	ZN	Zinc	mg	0.00192839	0.001712274	30.68274005
Subsaharan Africa	Angola	AGO	2008	18314000	0	2244	0.870408127	MG	Magnesium	mg	0.382327005	0.219734486	0.153919532
Subsaharan Africa	Angola	AGO	2008	18314000	0	2244	0.870408127	CA	Calcium	mg	0.565779427	0.772182728	81.35340919
Subsaharan Africa	Angola	AGO	2008	18314000	0	2244	0.870408127	CU	Copper	mcg	0.001397112	0.000555729	0.91003132
Subsaharan Africa	Angola	AGO	2008	18314000	0	2244	0.870408127	VITA_RAE	Vitamin A	mcg	0.000236265	0.000452207	90.26949368
Subsaharan Africa	Angola	AGO	2008	18314000	0	2244	0.870408127	RIBF	Riboflavin	mg	0.000850596	0.000808443	43.10111375
Subsaharan Africa	Angola	AGO	2008	18314000	0	2244	0.870408127	THIA	Thiamin	mg	0.000940271	0.000764536	22.1780422
Subsaharan Africa	Angola	AGO	2009	18927000	0	2300	0.875382026	RIBF	Riboflavin	mg	0.000872816	0.000808898	39.61227317
Subsaharan Africa	Angola	AGO	2009	18927000	0	2300	0.875382026	THIA	Thiamin	mg	0.001015256	0.000764938	13.76815863
Subsaharan Africa	Angola	AGO	2009	18927000	0	2300	0.875382026	NIA	Niacin	mg	0.014958846	0.009259847	0.691187281
Subsaharan Africa	Angola	AGO	2009	18927000	0	2300	0.875382026	VITA_RAE	Vitamin A	mcg	0.000266378	0.000452449	84.58856785
Subsaharan Africa	Angola	AGO	2009	18927000	0	2300	0.875382026	P	Phosphorus	mg	0.94282167	0.623879336	2.043247909
Subsaharan Africa	Angola	AGO	2009	18927000	0	2300	0.875382026	VITB12	Vitamin B12	mcg	1.90E-06	1.57E-06	22.51260634
Subsaharan Africa	Angola	AGO	2009	18927000	0	2300	0.875382026	MG	Magnesium	mg	0.398752807	0.219942516	0.057308914
Subsaharan Africa	Angola	AGO	2009	18927000	0	2300	0.875382026	ZN	Zinc	mg	0.00194636	0.001713417	29.32856068
Subsaharan Africa	Angola	AGO	2009	18927000	0	2300	0.875382026	FOL	Folate	mcg	0.000329036	0.000261438	19.4379589
Subsaharan Africa	Angola	AGO	2009	18927000	0	2300	0.875382026	CA	Calcium	mg	0.581008513	0.772744798	79.59038402
Subsaharan Africa	Angola	AGO	2009	18927000	0	2300	0.875382026	VITB6A	Vitamin B6	mg	0.002035762	0.000893624	1.59E-05
Subsaharan Africa	Angola	AGO	2009	18927000	0	2300	0.875382026	VITC	Vitamin C	mg	0.183428612	0.048220962	0.012583308
Subsaharan Africa	Angola	AGO	2009	18927000	0	2300	0.875382026	FE	Iron	mg	0.00902413	0.007067953	20.41650025
Subsaharan Africa	Angola	AGO	2009	18927000	0	2300	0.875382026	CU	Copper	mcg	0.0015101	0.000556057	0.552304173
Subsaharan Africa	Angola	AGO	2010	19549000	0	2338	0.869613982	FE	Iron	mg	0.009090898	0.007075825	19.95916301
Subsaharan Africa	Angola	AGO	2010	19549000	0	2338	0.869613982	VITB6A	Vitamin B6	mg	0.002062297	0.000894435	8.81E-06
Subsaharan Africa	Angola	AGO	2010	19549000	0	2338	0.869613982	VITC	Vitamin C	mg	0.18443034	0.048282347	0.012061599
Subsaharan Africa	Angola	AGO	2010	19549000	0	2338	0.869613982	VITA_RAE	Vitamin A	mcg	0.000269549	0.000452873	83.97837512
Subsaharan Africa	Angola	AGO	2010	19549000	0	2338	0.869613982	FOL	Folate	mcg	0.000330811	0.000261665	18.91998171
Subsaharan Africa	Angola	AGO	2010	19549000	0	2338	0.869613982	CU	Copper	mcg	0.001517792	0.000556619	0.537507208
Subsaharan Africa	Angola	AGO	2010	19549000	0	2338	0.869613982	THIA	Thiamin	mg	0.001026735	0.000765638	12.7825625
Subsaharan Africa	Angola	AGO	2010	19549000	0	2338	0.869613982	CA	Calcium	mg	0.587313048	0.773574569	78.88973096
Subsaharan Africa	Angola	AGO	2010	19549000	0	2338	0.869613982	ZN	Zinc	mg	0.001942596	0.001715467	29.81937819
Subsaharan Africa	Angola	AGO	2010	19549000	0	2338	0.869613982	NIA	Niacin	mg	0.015537572	0.009269008	0.341345695
Subsaharan Africa	Angola	AGO	2010	19549000	0	2338	0.869613982	MG	Magnesium	mg	0.406947679	0.220286883	0.035021237
Subsaharan Africa	Angola	AGO	2010	19549000	0	2338	0.869613982	P	Phosphorus	mg	0.961636795	0.624578871	1.543962775
Subsaharan Africa	Angola	AGO	2010	19549000	0	2338	0.869613982	VITB12	Vitamin B12	mcg	1.83E-06	1.57E-06	23.54076869
Subsaharan Africa	Angola	AGO	2010	19549000	0	2338	0.869613982	RIBF	Riboflavin	mg	0.000897885	0.000809675	35.8245111
Subsaharan Africa	Angola	AGO	2011	20180000	1	2404	0.878162671	VITC	Vitamin C	mg	0.189764269	0.048297238	0.009034144
Subsaharan Africa	Angola	AGO	2011	20180000	0	2404	0.878162671	VITA_RAE	Vitamin A	mcg	0.000283991	0.000453002	80.85838861
Subsaharan Africa	Angola	AGO	2011	20180000	1	2404	0.878162671	VITB12	Vitamin B12	mcg	2.02E-06	1.57E-06	21.04119286
Subsaharan Africa	Angola	AGO	2011	20180000	1	2404	0.878162671	MG	Magnesium	mg	0.415887946	0.220414491	0.019454192
Subsaharan Africa	Angola	AGO	2011	20180000	1	2404	0.878162671	VITB6A	Vitamin B6	mg	0.002126098	0.000894624	1.83E-06
Subsaharan Africa	Angola	AGO	2011	20180000	1	2404	0.878162671	CU	Copper	mcg	0.00154627	0.000556803	0.475388838
Subsaharan Africa	Angola	AGO	2011	20180000	0	2404	0.878162671	VITB12	Vitamin B12	mcg	2.02E-06	1.57E-06	21.04119286
Subsaharan Africa	Angola	AGO	2011	20180000	1	2404	0.878162671	FOL	Folate	mcg	0.000342765	0.000261728	15.10191554
Subsaharan Africa	Angola	AGO	2011	20180000	0	2404	0.878162671	FOL	Folate	mcg	0.000342765	0.000261728	15.10191554
Subsaharan Africa	Angola	AGO	2011	20180000	0	2404	0.878162671	FE	Iron	mg	0.009511312	0.007078104	16.86303831
Subsaharan Africa	Angola	AGO	2011	20180000	1	2404	0.878162671	ZN	Zinc	mg	0.002008302	0.001716038	24.78555855
Subsaharan Africa	Angola	AGO	2011	20180000	1	2404	0.878162671	CA	Calcium	mg	0.602507226	0.774040219	76.99527126
Subsaharan Africa	Angola	AGO	2011	20180000	0	2404	0.878162671	P	Phosphorus	mg	0.997073926	0.62507468	0.864432878
Subsaharan Africa	Angola	AGO	2011	20180000	1	2404	0.878162671	FE	Iron	mg	0.009511312	0.007078104	16.86303831
Subsaharan Africa	Angola	AGO	2011	20180000	0	2404	0.878162671	VITB6A	Vitamin B6	mg	0.002126098	0.000894624	1.83E-06
Subsaharan Africa	Angola	AGO	2011	20180000	0	2404	0.878162671	VITC	Vitamin C	mg	0.189764269	0.048297238	0.009034144
Subsaharan Africa	Angola	AGO	2011	20180000	0	2404	0.878162671	ZN	Zinc	mg	0.002008302	0.001716038	24.78555855
Subsaharan Africa	Angola	AGO	2011	20180000	1	2404	0.878162671	VITA_RAE	Vitamin A	mcg	0.000283991	0.000453002	80.85838861
Subsaharan Africa	Angola	AGO	2011	20180000	0	2404	0.878162671	CU	Copper	mcg	0.00154627	0.000556803	0.475388838
Subsaharan Africa	Angola	AGO	2011	20180000	0	2404	0.878162671	MG	Magnesium	mg	0.415887946	0.220414491	0.019454192
Subsaharan Africa	Angola	AGO	2011	20180000	0	2404	0.878162671	NIA	Niacin	mg	0.016590334	0.009272227	0.079700553
Subsaharan Africa	Angola	AGO	2011	20180000	1	2404	0.878162671	NIA	Niacin	mg	0.016590334	0.009272227	0.079700553
Subsaharan Africa	Angola	AGO	2011	20180000	1	2404	0.878162671	P	Phosphorus	mg	0.997073926	0.62507468	0.864432878
Subsaharan Africa	Angola	AGO	2011	20180000	0	2404	0.878162671	THIA	Thiamin	mg	0.001087776	0.000765853	8.05837005
Subsaharan Africa	Angola	AGO	2011	20180000	1	2404	0.878162671	THIA	Thiamin	mg	0.001087776	0.000765853	8.05837005
Subsaharan Africa	Angola	AGO	2011	20180000	0	2404	0.878162671	CA	Calcium	mg	0.602507226	0.774040219	76.99527126
Subsaharan Africa	Angola	AGO	2011	20180000	1	2404	0.878162671	RIBF	Riboflavin	mg	0.000944832	0.000809934	28.93857082
Subsaharan Africa	Angola	AGO	2011	20180000	0	2404	0.878162671	RIBF	Riboflavin	mg	0.000944832	0.000809934	28.93857082
Other	Albania	ALB	1961	1669000	0	2224	0.884642686	ZN	Zinc	mg	0.001584792	0.001781096	67.03427054
Other	Albania	ALB	1961	1669000	0	2224	0.884642686	THIA	Thiamin	mg	0.00118598	0.000785126	4.438996052
Other	Albania	ALB	1961	1669000	0	2224	0.884642686	MG	Magnesium	mg	0.457346959	0.229462371	0.003556171
Other	Albania	ALB	1961	1669000	0	2224	0.884642686	VITB12	Vitamin B12	mcg	2.58E-06	1.61E-06	16.11835737
Other	Albania	ALB	1961	1669000	0	2224	0.884642686	P	Phosphorus	mg	1.167365776	0.613401405	0.01516821
Other	Albania	ALB	1961	1669000	0	2224	0.884642686	VITB6A	Vitamin B6	mg	0.001448187	0.000928316	1.254344966
Other	Albania	ALB	1961	1669000	0	2224	0.884642686	RIBF	Riboflavin	mg	0.00120688	0.000830629	6.553405745
Other	Albania	ALB	1961	1669000	0	2224	0.884642686	VITC	Vitamin C	mg	0.067472979	0.050427229	17.1441911
Other	Albania	ALB	1961	1669000	0	2224	0.884642686	VITA_RAE	Vitamin A	mcg	0.000463321	0.000465345	41.89581851
Other	Albania	ALB	1961	1669000	0	2224	0.884642686	NIA	Niacin	mg	0.015363287	0.009497342	0.674503435
Other	Albania	ALB	1961	1669000	0	2224	0.884642686	CU	Copper	mcg	0.001387112	0.000570485	1.119295743
Other	Albania	ALB	1961	1669000	0	2224	0.884642686	FE	Iron	mg	0.003590625	0.007034528	93.97872847
Other	Albania	ALB	1961	1669000	0	2224	0.884642686	FOL	Folate	mcg	0.000271663	0.000267238	47.79902344
Other	Albania	ALB	1961	1669000	0	2224	0.884642686	CA	Calcium	mg	0.816821517	0.784679527	44.56972918
Other	Albania	ALB	1962	1719000	0	2239	0.880391734	NIA	Niacin	mg	0.015251319	0.009491245	0.760098122
Other	Albania	ALB	1962	1719000	0	2239	0.880391734	VITC	Vitamin C	mg	0.062705611	0.05034755	22.29153285
Other	Albania	ALB	1962	1719000	0	2239	0.880391734	CA	Calcium	mg	0.808512364	0.785091843	46.03950342
Other	Albania	ALB	1962	1719000	0	2239	0.880391734	CU	Copper	mcg	0.001362283	0.000570047	1.243286273
Other	Albania	ALB	1962	1719000	0	2239	0.880391734	MG	Magnesium	mg	0.454826836	0.229256863	0.004148205
Other	Albania	ALB	1962	1719000	0	2239	0.880391734	ZN	Zinc	mg	0.001573351	0.00177895	67.80638807
Other	Albania	ALB	1962	1719000	0	2239	0.880391734	VITB6A	Vitamin B6	mg	0.001436238	0.000927136	1.402986332
Other	Albania	ALB	1962	1719000	0	2239	0.880391734	FE	Iron	mg	0.003572458	0.007029084	94.11084786
Other	Albania	ALB	1962	1719000	0	2239	0.880391734	RIBF	Riboflavin	mg	0.001193723	0.000830082	7.210922727
Other	Albania	ALB	1962	1719000	0	2239	0.880391734	P	Phosphorus	mg	1.159843931	0.614744249	0.019494157
Other	Albania	ALB	1962	1719000	0	2239	0.880391734	THIA	Thiamin	mg	0.001184951	0.000784435	4.438439419
Other	Albania	ALB	1962	1719000	0	2239	0.880391734	FOL	Folate	mcg	0.000274492	0.000266994	46.27085728
Other	Albania	ALB	1962	1719000	0	2239	0.880391734	VITB12	Vitamin B12	mcg	2.55E-06	1.61E-06	16.3655396
Other	Albania	ALB	1962	1719000	0	2239	0.880391734	VITA_RAE	Vitamin A	mcg	0.000454633	0.000464949	43.54729011
Other	Albania	ALB	1963	1771000	0	2155	0.893782828	NIA	Niacin	mg	0.014549991	0.009491759	1.651858835
Other	Albania	ALB	1963	1771000	0	2155	0.893782828	VITB6A	Vitamin B6	mg	0.001402952	0.000926608	1.987728063
Other	Albania	ALB	1963	1771000	0	2155	0.893782828	ZN	Zinc	mg	0.00156541	0.001778323	68.39976148
Other	Albania	ALB	1963	1771000	0	2155	0.893782828	THIA	Thiamin	mg	0.001126952	0.000784252	7.261440711
Other	Albania	ALB	1963	1771000	0	2155	0.893782828	VITA_RAE	Vitamin A	mcg	0.000494553	0.000464869	35.98527195
Other	Albania	ALB	1963	1771000	0	2155	0.893782828	MG	Magnesium	mg	0.447131766	0.229296758	0.007233232
Other	Albania	ALB	1963	1771000	0	2155	0.893782828	VITC	Vitamin C	mg	0.068093205	0.050310454	16.39749397
Other	Albania	ALB	1963	1771000	0	2155	0.893782828	RIBF	Riboflavin	mg	0.001148943	0.000830113	10.02263025
Other	Albania	ALB	1963	1771000	0	2155	0.893782828	FOL	Folate	mcg	0.000275033	0.000266934	45.97234565
Other	Albania	ALB	1963	1771000	0	2155	0.893782828	VITB12	Vitamin B12	mcg	2.51E-06	1.61E-06	16.69377155
Other	Albania	ALB	1963	1771000	0	2155	0.893782828	P	Phosphorus	mg	1.143939974	0.616847835	0.031544812
Other	Albania	ALB	1963	1771000	0	2155	0.893782828	CU	Copper	mcg	0.001301516	0.000570027	1.628678405
Other	Albania	ALB	1963	1771000	0	2155	0.893782828	FE	Iron	mg	0.00345242	0.007030567	95.08763771
Other	Albania	ALB	1963	1771000	0	2155	0.893782828	CA	Calcium	mg	0.813956566	0.786218295	45.31914803
Other	Albania	ALB	1964	1822000	0	2270	0.88383457	VITA_RAE	Vitamin A	mcg	0.000499692	0.000465072	35.12634678
Other	Albania	ALB	1964	1822000	0	2270	0.88383457	THIA	Thiamin	mg	0.001178132	0.000784538	4.723265488
Other	Albania	ALB	1964	1822000	0	2270	0.88383457	CU	Copper	mcg	0.001351176	0.00057037	1.310449761
Other	Albania	ALB	1964	1822000	0	2270	0.88383457	RIBF	Riboflavin	mg	0.001176734	0.000830644	8.244013429
Other	Albania	ALB	1964	1822000	0	2270	0.88383457	CA	Calcium	mg	0.830340666	0.787865921	42.86925626
Other	Albania	ALB	1964	1822000	0	2270	0.88383457	FOL	Folate	mcg	0.00028649	0.000267046	40.41147536
Other	Albania	ALB	1964	1822000	0	2270	0.88383457	FE	Iron	mg	0.003572663	0.007038554	94.15001624
Other	Albania	ALB	1964	1822000	0	2270	0.88383457	VITB12	Vitamin B12	mcg	2.41E-06	1.61E-06	17.58678218
Other	Albania	ALB	1964	1822000	0	2270	0.88383457	P	Phosphorus	mg	1.166162488	0.619450028	0.020753751
Other	Albania	ALB	1964	1822000	0	2270	0.88383457	VITB6A	Vitamin B6	mg	0.00146145	0.000926675	1.048949473
Other	Albania	ALB	1964	1822000	0	2270	0.88383457	MG	Magnesium	mg	0.459322276	0.229557775	0.003119262
Other	Albania	ALB	1964	1822000	0	2270	0.88383457	VITC	Vitamin C	mg	0.071608909	0.05031361	13.37665475
Other	Albania	ALB	1964	1822000	0	2270	0.88383457	NIA	Niacin	mg	0.014976498	0.009498	1.052123544
Other	Albania	ALB	1964	1822000	0	2270	0.88383457	ZN	Zinc	mg	0.001550819	0.001779107	69.61168446
Other	Albania	ALB	1965	1874000	0	2253	0.884529014	ZN	Zinc	mg	0.001557168	0.001781127	69.25037537
Other	Albania	ALB	1965	1874000	0	2253	0.884529014	CA	Calcium	mg	0.825891036	0.789837666	43.95322675
Other	Albania	ALB	1965	1874000	0	2253	0.884529014	VITC	Vitamin C	mg	0.067351588	0.05035294	17.16575848
Other	Albania	ALB	1965	1874000	0	2253	0.884529014	FOL	Folate	mcg	0.000287566	0.000267304	40.02619398
Other	Albania	ALB	1965	1874000	0	2253	0.884529014	FE	Iron	mg	0.003594339	0.007052064	94.02372956
Other	Albania	ALB	1965	1874000	0	2253	0.884529014	VITB6A	Vitamin B6	mg	0.001458378	0.000927255	1.097694541
Other	Albania	ALB	1965	1874000	0	2253	0.884529014	VITA_RAE	Vitamin A	mcg	0.00048632	0.000465515	37.58002797
Other	Albania	ALB	1965	1874000	0	2253	0.884529014	VITB12	Vitamin B12	mcg	2.41E-06	1.61E-06	17.6213081
Other	Albania	ALB	1965	1874000	0	2253	0.884529014	THIA	Thiamin	mg	0.001180326	0.000785233	4.67536494
Other	Albania	ALB	1965	1874000	0	2253	0.884529014	P	Phosphorus	mg	1.161216492	0.622285286	0.026589892
Other	Albania	ALB	1965	1874000	0	2253	0.884529014	RIBF	Riboflavin	mg	0.001169339	0.000831578	8.788510261
Other	Albania	ALB	1965	1874000	0	2253	0.884529014	CU	Copper	mcg	0.001346205	0.000571007	1.348614545
Other	Albania	ALB	1965	1874000	0	2253	0.884529014	NIA	Niacin	mg	0.015170771	0.0095089	0.861613148
Other	Albania	ALB	1965	1874000	0	2253	0.884529014	MG	Magnesium	mg	0.459471436	0.230005454	0.003295066
Other	Albania	ALB	1966	1926000	0	2253	0.854933496	VITB12	Vitamin B12	mcg	2.41E-06	1.62E-06	17.64199821
Other	Albania	ALB	1966	1926000	0	2253	0.854933496	MG	Magnesium	mg	0.447072714	0.230593778	0.008661657
Other	Albania	ALB	1966	1926000	0	2253	0.854933496	CA	Calcium	mg	0.795787085	0.792043441	49.37148403
Other	Albania	ALB	1966	1926000	0	2253	0.854933496	VITA_RAE	Vitamin A	mcg	0.000386882	0.000466108	58.67243732
Other	Albania	ALB	1966	1926000	0	2253	0.854933496	FOL	Folate	mcg	0.000270062	0.000267657	48.80545366
Other	Albania	ALB	1966	1926000	0	2253	0.854933496	NIA	Niacin	mg	0.015029863	0.009523195	1.036269554
Other	Albania	ALB	1966	1926000	0	2253	0.854933496	FE	Iron	mg	0.003495085	0.007072319	94.91742983
Other	Albania	ALB	1966	1926000	0	2253	0.854933496	CU	Copper	mcg	0.001351501	0.000571847	1.328984028
Other	Albania	ALB	1966	1926000	0	2253	0.854933496	THIA	Thiamin	mg	0.001160336	0.000786207	5.634495698
Other	Albania	ALB	1966	1926000	0	2253	0.854933496	VITC	Vitamin C	mg	0.053476381	0.050412521	36.47563157
Other	Albania	ALB	1966	1926000	0	2253	0.854933496	VITB6A	Vitamin B6	mg	0.001425995	0.000927928	1.589643547
Other	Albania	ALB	1966	1926000	0	2253	0.854933496	RIBF	Riboflavin	mg	0.001149066	0.000832784	10.27634005
Other	Albania	ALB	1966	1926000	0	2253	0.854933496	ZN	Zinc	mg	0.001556769	0.001783901	69.47264521
Other	Albania	ALB	1966	1926000	0	2253	0.854933496	P	Phosphorus	mg	1.139807353	0.625492382	0.050267604
Other	Albania	ALB	1967	1979000	0	2264	0.8577854	FE	Iron	mg	0.003619371	0.007095263	93.99800724
Other	Albania	ALB	1967	1979000	0	2264	0.8577854	CU	Copper	mcg	0.001373157	0.000572821	1.22025206
Other	Albania	ALB	1967	1979000	0	2264	0.8577854	ZN	Zinc	mg	0.001609825	0.001787363	65.44334155
Other	Albania	ALB	1967	1979000	0	2264	0.8577854	CA	Calcium	mg	0.796663178	0.794318223	49.60742588
Other	Albania	ALB	1967	1979000	0	2264	0.8577854	MG	Magnesium	mg	0.449565421	0.231261541	0.007972229
Other	Albania	ALB	1967	1979000	0	2264	0.8577854	FOL	Folate	mcg	0.000277315	0.000268093	45.43575396
Other	Albania	ALB	1967	1979000	0	2264	0.8577854	VITC	Vitamin C	mg	0.051606937	0.050491749	40.15517599
Other	Albania	ALB	1967	1979000	0	2264	0.8577854	P	Phosphorus	mg	1.1607853	0.628713418	0.035570034
Other	Albania	ALB	1967	1979000	0	2264	0.8577854	VITB12	Vitamin B12	mcg	2.70E-06	1.62E-06	15.29372317
Other	Albania	ALB	1967	1979000	0	2264	0.8577854	RIBF	Riboflavin	mg	0.001175955	0.000834183	8.601776212
Other	Albania	ALB	1967	1979000	0	2264	0.8577854	THIA	Thiamin	mg	0.001174079	0.000787386	5.081213178
Other	Albania	ALB	1967	1979000	0	2264	0.8577854	VITB6A	Vitamin B6	mg	0.001454712	0.000928929	1.178594955
Other	Albania	ALB	1967	1979000	0	2264	0.8577854	NIA	Niacin	mg	0.015482835	0.00953947	0.634923903
Other	Albania	ALB	1967	1979000	0	2264	0.8577854	VITA_RAE	Vitamin A	mcg	0.000398249	0.000466829	56.17022201
Other	Albania	ALB	1968	2031000	0	2341	0.842807416	NIA	Niacin	mg	0.015953524	0.009558467	0.372327508
Other	Albania	ALB	1968	2031000	0	2341	0.842807416	P	Phosphorus	mg	1.167951791	0.631831815	0.034431344
Other	Albania	ALB	1968	2031000	0	2341	0.842807416	VITC	Vitamin C	mg	0.051143467	0.050598123	41.27591139
Other	Albania	ALB	1968	2031000	0	2341	0.842807416	FE	Iron	mg	0.003708629	0.007121045	93.32944385
Other	Albania	ALB	1968	2031000	0	2341	0.842807416	VITB6A	Vitamin B6	mg	0.001505042	0.000930342	0.673837516
Other	Albania	ALB	1968	2031000	0	2341	0.842807416	FOL	Folate	mcg	0.000287047	0.000268625	40.95942808
Other	Albania	ALB	1968	2031000	0	2341	0.842807416	VITB12	Vitamin B12	mcg	2.45E-06	1.62E-06	17.39254026
Other	Albania	ALB	1968	2031000	0	2341	0.842807416	CA	Calcium	mg	0.786708269	0.796654108	51.65972099
Other	Albania	ALB	1968	2031000	0	2341	0.842807416	CU	Copper	mcg	0.00141794	0.000573978	1.015067856
Other	Albania	ALB	1968	2031000	0	2341	0.842807416	ZN	Zinc	mg	0.001577572	0.001791676	68.36739798
Other	Albania	ALB	1968	2031000	0	2341	0.842807416	MG	Magnesium	mg	0.463766889	0.232027547	0.003234282
Other	Albania	ALB	1968	2031000	0	2341	0.842807416	RIBF	Riboflavin	mg	0.001158876	0.000835836	9.88218633
Other	Albania	ALB	1968	2031000	0	2341	0.842807416	THIA	Thiamin	mg	0.001214747	0.000788826	3.594561485
Other	Albania	ALB	1968	2031000	0	2341	0.842807416	VITA_RAE	Vitamin A	mcg	0.000370403	0.000467709	62.87239639
Other	Albania	ALB	1969	2085000	0	2404	0.846632001	FOL	Folate	mcg	0.000291396	0.000269236	39.19047623
Other	Albania	ALB	1969	2085000	0	2404	0.846632001	MG	Magnesium	mg	0.473050518	0.232876139	0.00185079
Other	Albania	ALB	1969	2085000	0	2404	0.846632001	FE	Iron	mg	0.003789597	0.007148656	92.71334835
Other	Albania	ALB	1969	2085000	0	2404	0.846632001	NIA	Niacin	mg	0.016502283	0.009580018	0.192441273
Other	Albania	ALB	1969	2085000	0	2404	0.846632001	ZN	Zinc	mg	0.001575728	0.001796768	68.86700138
Other	Albania	ALB	1969	2085000	0	2404	0.846632001	VITC	Vitamin C	mg	0.057803686	0.050733202	29.76081775
Other	Albania	ALB	1969	2085000	0	2404	0.846632001	P	Phosphorus	mg	1.183974662	0.634592529	0.026719651
Other	Albania	ALB	1969	2085000	0	2404	0.846632001	CA	Calcium	mg	0.796750478	0.798935336	50.36365915
Other	Albania	ALB	1969	2085000	0	2404	0.846632001	CU	Copper	mcg	0.001443218	0.000575308	0.922429516
Other	Albania	ALB	1969	2085000	0	2404	0.846632001	VITB12	Vitamin B12	mcg	2.45E-06	1.63E-06	17.45323879
Other	Albania	ALB	1969	2085000	0	2404	0.846632001	VITB6A	Vitamin B6	mg	0.001564495	0.00093215	0.332892346
Other	Albania	ALB	1969	2085000	0	2404	0.846632001	THIA	Thiamin	mg	0.001248267	0.000790511	2.679015076
Other	Albania	ALB	1969	2085000	0	2404	0.846632001	VITA_RAE	Vitamin A	mcg	0.000397528	0.000468735	56.71011658
Other	Albania	ALB	1969	2085000	0	2404	0.846632001	RIBF	Riboflavin	mg	0.001173783	0.000837716	9.057296295
Other	Albania	ALB	1970	2139000	0	2414	0.87321736	FE	Iron	mg	0.003876198	0.00717635	92.01611687
Other	Albania	ALB	1970	2139000	0	2414	0.87321736	VITA_RAE	Vitamin A	mcg	0.000478827	0.000469837	39.78760699
Other	Albania	ALB	1970	2139000	0	2414	0.87321736	CU	Copper	mcg	0.001471116	0.000576729	0.83027231
Other	Albania	ALB	1970	2139000	0	2414	0.87321736	RIBF	Riboflavin	mg	0.001205814	0.000839699	7.306210559
Other	Albania	ALB	1970	2139000	0	2414	0.87321736	NIA	Niacin	mg	0.016403997	0.009602838	0.230582375
Other	Albania	ALB	1970	2139000	0	2414	0.87321736	P	Phosphorus	mg	1.201054203	0.636744943	0.019633436
Other	Albania	ALB	1970	2139000	0	2414	0.87321736	MG	Magnesium	mg	0.477946038	0.233756971	0.001467114
Other	Albania	ALB	1970	2139000	0	2414	0.87321736	FOL	Folate	mcg	0.000311344	0.000269882	30.42869785
Other	Albania	ALB	1970	2139000	0	2414	0.87321736	CA	Calcium	mg	0.833531219	0.800988196	44.61364901
Other	Albania	ALB	1970	2139000	0	2414	0.87321736	ZN	Zinc	mg	0.001599584	0.001802287	67.36009676
Other	Albania	ALB	1970	2139000	0	2414	0.87321736	THIA	Thiamin	mg	0.001275366	0.000792335	2.107163251
Other	Albania	ALB	1970	2139000	0	2414	0.87321736	VITB6A	Vitamin B6	mg	0.001625143	0.000934205	0.154620963
Other	Albania	ALB	1970	2139000	0	2414	0.87321736	VITB12	Vitamin B12	mcg	2.40E-06	1.63E-06	17.95123315
Other	Albania	ALB	1970	2139000	0	2414	0.87321736	VITC	Vitamin C	mg	0.072006419	0.050889006	13.70620941
Other	Albania	ALB	1971	2195000	0	2360	0.874867937	MG	Magnesium	mg	0.46999863	0.234442249	0.002922171
Other	Albania	ALB	1971	2195000	0	2360	0.874867937	CU	Copper	mcg	0.001424493	0.000577855	1.028484137
Other	Albania	ALB	1971	2195000	0	2360	0.874867937	CA	Calcium	mg	0.846187546	0.802327413	42.77048716
Other	Albania	ALB	1971	2195000	0	2360	0.874867937	RIBF	Riboflavin	mg	0.001205247	0.000841247	7.460839685
Other	Albania	ALB	1971	2195000	0	2360	0.874867937	FOL	Folate	mcg	0.000296775	0.000270396	37.25199491
Other	Albania	ALB	1971	2195000	0	2360	0.874867937	ZN	Zinc	mg	0.001599452	0.00180668	67.68124311
Other	Albania	ALB	1971	2195000	0	2360	0.874867937	THIA	Thiamin	mg	0.001247116	0.000793802	2.848416548
Other	Albania	ALB	1971	2195000	0	2360	0.874867937	NIA	Niacin	mg	0.016264113	0.009620836	0.287209856
Other	Albania	ALB	1971	2195000	0	2360	0.874867937	P	Phosphorus	mg	1.194020062	0.638152884	0.02467815
Other	Albania	ALB	1971	2195000	0	2360	0.874867937	VITA_RAE	Vitamin A	mcg	0.000456514	0.000470707	44.29799254
Other	Albania	ALB	1971	2195000	0	2360	0.874867937	VITB12	Vitamin B12	mcg	2.48E-06	1.63E-06	17.23604735
Other	Albania	ALB	1971	2195000	0	2360	0.874867937	VITB6A	Vitamin B6	mg	0.001585696	0.000935666	0.272719712
Other	Albania	ALB	1971	2195000	0	2360	0.874867937	VITC	Vitamin C	mg	0.067032897	0.051016184	18.36993037
Other	Albania	ALB	1971	2195000	0	2360	0.874867937	FE	Iron	mg	0.003770477	0.007201143	93.14777546
Other	Albania	ALB	1972	2251000	0	2384	0.875014578	RIBF	Riboflavin	mg	0.001202451	0.000842855	7.749358456
Other	Albania	ALB	1972	2251000	0	2384	0.875014578	CA	Calcium	mg	0.84050636	0.803460715	43.89262959
Other	Albania	ALB	1972	2251000	0	2384	0.875014578	CU	Copper	mcg	0.001430114	0.00057904	1.016527858
Other	Albania	ALB	1972	2251000	0	2384	0.875014578	THIA	Thiamin	mg	0.001276052	0.000795365	2.197657762
Other	Albania	ALB	1972	2251000	0	2384	0.875014578	NIA	Niacin	mg	0.016781847	0.009639639	0.151990819
Other	Albania	ALB	1972	2251000	0	2384	0.875014578	FE	Iron	mg	0.003888142	0.007225621	92.16020611
Other	Albania	ALB	1972	2251000	0	2384	0.875014578	VITC	Vitamin C	mg	0.067472111	0.051158331	18.11248787
Other	Albania	ALB	1972	2251000	0	2384	0.875014578	ZN	Zinc	mg	0.001582809	0.001811349	69.31097793
Other	Albania	ALB	1972	2251000	0	2384	0.875014578	VITA_RAE	Vitamin A	mcg	0.000468204	0.000471624	42.16143347
Other	Albania	ALB	1972	2251000	0	2384	0.875014578	VITB6A	Vitamin B6	mg	0.001594426	0.000937303	0.252119171
Other	Albania	ALB	1972	2251000	0	2384	0.875014578	FOL	Folate	mcg	0.000307029	0.000270931	32.84786013
Other	Albania	ALB	1972	2251000	0	2384	0.875014578	P	Phosphorus	mg	1.192667477	0.639040559	0.026475787
Other	Albania	ALB	1972	2251000	0	2384	0.875014578	VITB12	Vitamin B12	mcg	2.41E-06	1.64E-06	17.96385539
Other	Albania	ALB	1972	2251000	0	2384	0.875014578	MG	Magnesium	mg	0.478750119	0.235146752	0.001707597
Other	Albania	ALB	1973	2309000	0	2432	0.872887515	FE	Iron	mg	0.003865111	0.007249531	92.50559449
Other	Albania	ALB	1973	2309000	0	2432	0.872887515	VITB12	Vitamin B12	mcg	2.50E-06	1.64E-06	17.17587147
Other	Albania	ALB	1973	2309000	0	2432	0.872887515	VITC	Vitamin C	mg	0.06704236	0.051311846	18.76139113
Other	Albania	ALB	1973	2309000	0	2432	0.872887515	FOL	Folate	mcg	0.000301776	0.000271476	35.49320303
Other	Albania	ALB	1973	2309000	0	2432	0.872887515	P	Phosphorus	mg	1.20228557	0.639492507	0.02155717
Other	Albania	ALB	1973	2309000	0	2432	0.872887515	VITB6A	Vitamin B6	mg	0.00158803	0.000939087	0.285360741
Other	Albania	ALB	1973	2309000	0	2432	0.872887515	MG	Magnesium	mg	0.475926921	0.235859947	0.002337094
Other	Albania	ALB	1973	2309000	0	2432	0.872887515	NIA	Niacin	mg	0.016775224	0.00965899	0.160442375
Other	Albania	ALB	1973	2309000	0	2432	0.872887515	CA	Calcium	mg	0.876813649	0.804422207	38.20989397
Other	Albania	ALB	1973	2309000	0	2432	0.872887515	CU	Copper	mcg	0.001420699	0.000580267	1.072748456
Other	Albania	ALB	1973	2309000	0	2432	0.872887515	ZN	Zinc	mg	0.001590374	0.001816204	69.05350662
Other	Albania	ALB	1973	2309000	0	2432	0.872887515	RIBF	Riboflavin	mg	0.001242871	0.000844503	5.792959219
Other	Albania	ALB	1973	2309000	0	2432	0.872887515	THIA	Thiamin	mg	0.001275406	0.00079699	2.270009206
Other	Albania	ALB	1973	2309000	0	2432	0.872887515	VITA_RAE	Vitamin A	mcg	0.000478459	0.000472573	40.37936935
Other	Albania	ALB	1974	2367000	0	2492	0.872380628	NIA	Niacin	mg	0.017315936	0.009678637	0.079877615
Other	Albania	ALB	1974	2367000	0	2492	0.872380628	P	Phosphorus	mg	1.215774942	0.639634329	0.015732066
Other	Albania	ALB	1974	2367000	0	2492	0.872380628	THIA	Thiamin	mg	0.001306614	0.000798644	1.699739677
Other	Albania	ALB	1974	2367000	0	2492	0.872380628	FE	Iron	mg	0.004000822	0.007272678	91.28673805
Other	Albania	ALB	1974	2367000	0	2492	0.872380628	VITB12	Vitamin B12	mcg	2.49E-06	1.65E-06	17.29459992
Other	Albania	ALB	1974	2367000	0	2492	0.872380628	MG	Magnesium	mg	0.485254974	0.236571066	0.001306526
Other	Albania	ALB	1974	2367000	0	2492	0.872380628	VITA_RAE	Vitamin A	mcg	0.000484329	0.000473538	39.46654066
Other	Albania	ALB	1974	2367000	0	2492	0.872380628	CU	Copper	mcg	0.001458868	0.000581518	0.922150074
Other	Albania	ALB	1974	2367000	0	2492	0.872380628	VITB6A	Vitamin B6	mg	0.001645109	0.000940996	0.138102293
Other	Albania	ALB	1974	2367000	0	2492	0.872380628	RIBF	Riboflavin	mg	0.001253127	0.000846173	5.445462352
Other	Albania	ALB	1974	2367000	0	2492	0.872380628	FOL	Folate	mcg	0.000318264	0.000272021	28.54757546
Other	Albania	ALB	1974	2367000	0	2492	0.872380628	ZN	Zinc	mg	0.00160444	0.001821151	68.29581705
Other	Albania	ALB	1974	2367000	0	2492	0.872380628	VITC	Vitamin C	mg	0.069461162	0.051472654	16.58735053
Other	Albania	ALB	1974	2367000	0	2492	0.872380628	CA	Calcium	mg	0.881918939	0.80526867	37.55131007
Other	Albania	ALB	1975	2427000	0	2491	0.854699133	VITC	Vitamin C	mg	0.063316656	0.051638322	23.51938638
Other	Albania	ALB	1975	2427000	0	2491	0.854699133	VITB12	Vitamin B12	mcg	2.44E-06	1.65E-06	17.76281818
Other	Albania	ALB	1975	2427000	0	2491	0.854699133	VITB6A	Vitamin B6	mg	0.001613265	0.000943024	0.223493891
Other	Albania	ALB	1975	2427000	0	2491	0.854699133	MG	Magnesium	mg	0.473676582	0.237274481	0.003369841
Other	Albania	ALB	1975	2427000	0	2491	0.854699133	NIA	Niacin	mg	0.017153975	0.009698431	0.1052695
Other	Albania	ALB	1975	2427000	0	2491	0.854699133	P	Phosphorus	mg	1.185388784	0.639551807	0.032023346
Other	Albania	ALB	1975	2427000	0	2491	0.854699133	ZN	Zinc	mg	0.001582708	0.001826141	70.30593041
Other	Albania	ALB	1975	2427000	0	2491	0.854699133	FOL	Folate	mcg	0.000300577	0.000272563	36.5947348
Other	Albania	ALB	1975	2427000	0	2491	0.854699133	RIBF	Riboflavin	mg	0.001226473	0.000847855	6.830546139
Other	Albania	ALB	1975	2427000	0	2491	0.854699133	CA	Calcium	mg	0.853877634	0.806041834	42.15922349
Other	Albania	ALB	1975	2427000	0	2491	0.854699133	CU	Copper	mcg	0.001430381	0.000582784	1.056610055
Other	Albania	ALB	1975	2427000	0	2491	0.854699133	FE	Iron	mg	0.003901765	0.007294931	92.38753586
Other	Albania	ALB	1975	2427000	0	2491	0.854699133	THIA	Thiamin	mg	0.001278998	0.000800307	2.308804165
Other	Albania	ALB	1975	2427000	0	2491	0.854699133	VITA_RAE	Vitamin A	mcg	0.000448986	0.000474512	46.57554996
Other	Albania	ALB	1976	2486000	0	2680	0.863127101	VITB12	Vitamin B12	mcg	2.46E-06	1.65E-06	17.66519772
Other	Albania	ALB	1976	2486000	0	2680	0.863127101	VITA_RAE	Vitamin A	mcg	0.000500436	0.000475193	36.87211934
Other	Albania	ALB	1976	2486000	0	2680	0.863127101	RIBF	Riboflavin	mg	0.001294362	0.000849008	4.018651205
Other	Albania	ALB	1976	2486000	0	2680	0.863127101	MG	Magnesium	mg	0.510212774	0.237731006	0.000227311
Other	Albania	ALB	1976	2486000	0	2680	0.863127101	VITB6A	Vitamin B6	mg	0.001767237	0.000944408	0.024602015
Other	Albania	ALB	1976	2486000	0	2680	0.863127101	VITC	Vitamin C	mg	0.074682352	0.051761641	12.62715382
Other	Albania	ALB	1976	2486000	0	2680	0.863127101	NIA	Niacin	mg	0.01894104	0.009712015	0.007203465
Other	Albania	ALB	1976	2486000	0	2680	0.863127101	THIA	Thiamin	mg	0.001404504	0.000801476	0.607096644
Other	Albania	ALB	1976	2486000	0	2680	0.863127101	CA	Calcium	mg	0.887720298	0.806190573	36.80212689
Other	Albania	ALB	1976	2486000	0	2680	0.863127101	CU	Copper	mcg	0.001558126	0.000583666	0.618693017
Other	Albania	ALB	1976	2486000	0	2680	0.863127101	P	Phosphorus	mg	1.248044229	0.638961233	0.006865688
Other	Albania	ALB	1976	2486000	0	2680	0.863127101	ZN	Zinc	mg	0.001620551	0.001829675	67.62301081
Other	Albania	ALB	1976	2486000	0	2680	0.863127101	FE	Iron	mg	0.004369291	0.007312295	87.36972495
Other	Albania	ALB	1976	2486000	0	2680	0.863127101	FOL	Folate	mcg	0.000347498	0.000272936	18.12473602
Other	Albania	ALB	1977	2547000	0	2778	0.863059152	CU	Copper	mcg	0.001614068	0.000584729	0.495139224
Other	Albania	ALB	1977	2547000	0	2778	0.863059152	CA	Calcium	mg	0.919749047	0.806561931	31.9972361
Other	Albania	ALB	1977	2547000	0	2778	0.863059152	VITB12	Vitamin B12	mcg	2.47E-06	1.65E-06	17.58996428
Other	Albania	ALB	1977	2547000	0	2778	0.863059152	THIA	Thiamin	mg	0.00147003	0.000802855	0.28027406
Other	Albania	ALB	1977	2547000	0	2778	0.863059152	RIBF	Riboflavin	mg	0.00133659	0.000850391	2.833879998
Other	Albania	ALB	1977	2547000	0	2778	0.863059152	VITB6A	Vitamin B6	mg	0.001836217	0.000946115	0.008388079
Other	Albania	ALB	1977	2547000	0	2778	0.863059152	FE	Iron	mg	0.004597329	0.007331055	84.58127679
Other	Albania	ALB	1977	2547000	0	2778	0.863059152	P	Phosphorus	mg	1.287119615	0.638399298	0.002405043
Other	Albania	ALB	1977	2547000	0	2778	0.863059152	VITA_RAE	Vitamin A	mcg	0.000517987	0.000475995	34.03204996
Other	Albania	ALB	1977	2547000	0	2778	0.863059152	MG	Magnesium	mg	0.530624334	0.238289432	4.62E-05
Other	Albania	ALB	1977	2547000	0	2778	0.863059152	VITC	Vitamin C	mg	0.07609598	0.051906027	11.78827806
Other	Albania	ALB	1977	2547000	0	2778	0.863059152	FOL	Folate	mcg	0.000372377	0.000273367	11.36584211
Other	Albania	ALB	1977	2547000	0	2778	0.863059152	NIA	Niacin	mg	0.019911743	0.009728506	0.001413525
Other	Albania	ALB	1977	2547000	0	2778	0.863059152	ZN	Zinc	mg	0.001626748	0.001833783	67.42225912
Other	Albania	ALB	1978	2608000	0	2688	0.873871471	THIA	Thiamin	mg	0.001418224	0.000804349	0.547985689
Other	Albania	ALB	1978	2608000	0	2688	0.873871471	VITA_RAE	Vitamin A	mcg	0.000531825	0.000476861	31.96239321
Other	Albania	ALB	1978	2608000	0	2688	0.873871471	VITC	Vitamin C	mg	0.077209995	0.052061889	11.20726322
Other	Albania	ALB	1978	2608000	0	2688	0.873871471	CA	Calcium	mg	0.941868166	0.8070871	28.88810962
Other	Albania	ALB	1978	2608000	0	2688	0.873871471	ZN	Zinc	mg	0.001658532	0.001838189	65.20800901
Other	Albania	ALB	1978	2608000	0	2688	0.873871471	VITB12	Vitamin B12	mcg	2.60E-06	1.66E-06	16.55548965
Other	Albania	ALB	1978	2608000	0	2688	0.873871471	FE	Iron	mg	0.004414042	0.007350037	87.09632213
Other	Albania	ALB	1978	2608000	0	2688	0.873871471	MG	Magnesium	mg	0.511392976	0.238906925	0.000253087
Other	Albania	ALB	1978	2608000	0	2688	0.873871471	FOL	Folate	mcg	0.000355304	0.000273828	16.06454456
Other	Albania	ALB	1978	2608000	0	2688	0.873871471	CU	Copper	mcg	0.001568053	0.000585893	0.608426983
Other	Albania	ALB	1978	2608000	0	2688	0.873871471	RIBF	Riboflavin	mg	0.001350162	0.000851898	2.561061399
Other	Albania	ALB	1978	2608000	0	2688	0.873871471	VITB6A	Vitamin B6	mg	0.001788669	0.000948027	0.019489089
Other	Albania	ALB	1978	2608000	0	2688	0.873871471	P	Phosphorus	mg	1.274592921	0.637847806	0.00326096
Other	Albania	ALB	1978	2608000	0	2688	0.873871471	NIA	Niacin	mg	0.019060767	0.009746622	0.006604944
Other	Albania	ALB	1979	2671000	0	2607	0.874901094	MG	Magnesium	mg	0.48597792	0.239553347	0.001938131
Other	Albania	ALB	1979	2671000	0	2607	0.874901094	VITB12	Vitamin B12	mcg	2.64E-06	1.66E-06	16.31787137
Other	Albania	ALB	1979	2671000	0	2607	0.874901094	CA	Calcium	mg	0.937255992	0.807732708	29.64930517
Other	Albania	ALB	1979	2671000	0	2607	0.874901094	VITA_RAE	Vitamin A	mcg	0.000530521	0.000477753	32.32311396
Other	Albania	ALB	1979	2671000	0	2607	0.874901094	VITB6A	Vitamin B6	mg	0.001704247	0.000950056	0.0748273
Other	Albania	ALB	1979	2671000	0	2607	0.874901094	ZN	Zinc	mg	0.001656128	0.001842704	65.72630825
Other	Albania	ALB	1979	2671000	0	2607	0.874901094	CU	Copper	mcg	0.001475938	0.0005871	0.910191715
Other	Albania	ALB	1979	2671000	0	2607	0.874901094	P	Phosphorus	mg	1.231701801	0.637345757	0.009566569
Other	Albania	ALB	1979	2671000	0	2607	0.874901094	FOL	Folate	mcg	0.000330123	0.000274303	24.87823097
Other	Albania	ALB	1979	2671000	0	2607	0.874901094	RIBF	Riboflavin	mg	0.001322221	0.000853458	3.356222648
Other	Albania	ALB	1979	2671000	0	2607	0.874901094	VITC	Vitamin C	mg	0.075346823	0.05222172	12.62668054
Other	Albania	ALB	1979	2671000	0	2607	0.874901094	THIA	Thiamin	mg	0.001344017	0.000805885	1.301229937
Other	Albania	ALB	1979	2671000	0	2607	0.874901094	NIA	Niacin	mg	0.018022613	0.009765386	0.03594828
Other	Albania	ALB	1979	2671000	0	2607	0.874901094	FE	Iron	mg	0.004145051	0.007368515	90.33159994
Other	Albania	ALB	1980	2735000	0	2597	0.87375789	VITA_RAE	Vitamin A	mcg	0.000516591	0.000478671	34.74378955
Other	Albania	ALB	1980	2735000	0	2597	0.87375789	ZN	Zinc	mg	0.001653804	0.001847337	66.24110755
Other	Albania	ALB	1980	2735000	0	2597	0.87375789	CA	Calcium	mg	0.943183223	0.808505449	28.93604568
Other	Albania	ALB	1980	2735000	0	2597	0.87375789	VITC	Vitamin C	mg	0.071972291	0.052384254	15.45256847
Other	Albania	ALB	1980	2735000	0	2597	0.87375789	THIA	Thiamin	mg	0.001336819	0.000807454	1.443251239
Other	Albania	ALB	1980	2735000	0	2597	0.87375789	MG	Magnesium	mg	0.483428814	0.240224416	0.002565044
Other	Albania	ALB	1980	2735000	0	2597	0.87375789	CU	Copper	mcg	0.001459762	0.000588339	0.988001886
Other	Albania	ALB	1980	2735000	0	2597	0.87375789	FOL	Folate	mcg	0.000326223	0.000274794	26.63656784
Other	Albania	ALB	1980	2735000	0	2597	0.87375789	RIBF	Riboflavin	mg	0.001322501	0.000855065	3.421047721
Other	Albania	ALB	1980	2735000	0	2597	0.87375789	VITB6A	Vitamin B6	mg	0.001685864	0.000952192	0.102796087
Other	Albania	ALB	1980	2735000	0	2597	0.87375789	VITB12	Vitamin B12	mcg	2.65E-06	1.67E-06	16.24117396
Other	Albania	ALB	1980	2735000	0	2597	0.87375789	NIA	Niacin	mg	0.018024093	0.009784617	0.037811365
Other	Albania	ALB	1980	2735000	0	2597	0.87375789	P	Phosphorus	mg	1.227982345	0.63695494	0.010298452
Other	Albania	ALB	1980	2735000	0	2597	0.87375789	FE	Iron	mg	0.004121818	0.007386619	90.68558308
Other	Albania	ALB	1981	2799000	0	2676	0.876448328	CU	Copper	mcg	0.001520844	0.00058971	0.774086389
Other	Albania	ALB	1981	2799000	0	2676	0.876448328	CA	Calcium	mg	0.975787956	0.809532406	24.68062595
Other	Albania	ALB	1981	2799000	0	2676	0.876448328	NIA	Niacin	mg	0.019083128	0.009806012	0.007708435
Other	Albania	ALB	1981	2799000	0	2676	0.876448328	THIA	Thiamin	mg	0.001397988	0.000809184	0.764355061
Other	Albania	ALB	1981	2799000	0	2676	0.876448328	VITC	Vitamin C	mg	0.074631192	0.052556655	13.50459519
Other	Albania	ALB	1981	2799000	0	2676	0.876448328	RIBF	Riboflavin	mg	0.001365739	0.000856857	2.387155261
Other	Albania	ALB	1981	2799000	0	2676	0.876448328	MG	Magnesium	mg	0.498064035	0.240978033	0.000988926
Other	Albania	ALB	1981	2799000	0	2676	0.876448328	FOL	Folate	mcg	0.000345075	0.000275348	19.93023564
Other	Albania	ALB	1981	2799000	0	2676	0.876448328	VITB12	Vitamin B12	mcg	2.71E-06	1.67E-06	15.87716173
Other	Albania	ALB	1981	2799000	0	2676	0.876448328	VITB6A	Vitamin B6	mg	0.00177204	0.000954349	0.030489537
Other	Albania	ALB	1981	2799000	0	2676	0.876448328	P	Phosphorus	mg	1.254743756	0.636996311	0.005241594
Other	Albania	ALB	1981	2799000	0	2676	0.876448328	FE	Iron	mg	0.004370243	0.007408812	88.05050682
Other	Albania	ALB	1981	2799000	0	2676	0.876448328	VITA_RAE	Vitamin A	mcg	0.000530758	0.000479688	32.62446086
Other	Albania	ALB	1981	2799000	0	2676	0.876448328	ZN	Zinc	mg	0.00168413	0.001852402	64.18322916
Other	Albania	ALB	1982	2864000	0	2666	0.879811793	VITC	Vitamin C	mg	0.077840145	0.05273952	11.44667341
Other	Albania	ALB	1982	2864000	0	2666	0.879811793	ZN	Zinc	mg	0.001683631	0.001857791	64.61630941
Other	Albania	ALB	1982	2864000	0	2666	0.879811793	NIA	Niacin	mg	0.018907114	0.009828664	0.01100805
Other	Albania	ALB	1982	2864000	0	2666	0.879811793	P	Phosphorus	mg	1.263850986	0.637078232	0.004154722
Other	Albania	ALB	1982	2864000	0	2666	0.879811793	THIA	Thiamin	mg	0.00140079	0.00081101	0.767417147
Other	Albania	ALB	1982	2864000	0	2666	0.879811793	RIBF	Riboflavin	mg	0.001384103	0.000858764	2.071859401
Other	Albania	ALB	1982	2864000	0	2666	0.879811793	VITB6A	Vitamin B6	mg	0.001779815	0.000956686	0.028915911
Other	Albania	ALB	1982	2864000	0	2666	0.879811793	MG	Magnesium	mg	0.498251145	0.241782532	0.001102937
Other	Albania	ALB	1982	2864000	0	2666	0.879811793	FOL	Folate	mcg	0.000342684	0.000275935	21.00217358
Other	Albania	ALB	1982	2864000	0	2666	0.879811793	VITB12	Vitamin B12	mcg	2.68E-06	1.67E-06	16.16719743
Other	Albania	ALB	1982	2864000	0	2666	0.879811793	VITA_RAE	Vitamin A	mcg	0.000544677	0.000480768	30.66554317
Other	Albania	ALB	1982	2864000	0	2666	0.879811793	CU	Copper	mcg	0.00153722	0.000591164	0.734127399
Other	Albania	ALB	1982	2864000	0	2666	0.879811793	FE	Iron	mg	0.004336617	0.007431238	88.59773431
Other	Albania	ALB	1982	2864000	0	2666	0.879811793	CA	Calcium	mg	0.986887632	0.810674349	23.43627423
Other	Albania	ALB	1983	2930000	0	2799	0.877512254	FOL	Folate	mcg	0.00036817	0.000276537	13.46836309
Other	Albania	ALB	1983	2930000	0	2799	0.877512254	CA	Calcium	mg	1.011778717	0.811852931	20.58624161
Other	Albania	ALB	1983	2930000	0	2799	0.877512254	MG	Magnesium	mg	0.518899115	0.242611429	0.000261642
Other	Albania	ALB	1983	2930000	0	2799	0.877512254	NIA	Niacin	mg	0.020117187	0.009851856	0.001537249
Other	Albania	ALB	1983	2930000	0	2799	0.877512254	CU	Copper	mcg	0.00159622	0.000592655	0.583522271
Other	Albania	ALB	1983	2930000	0	2799	0.877512254	VITC	Vitamin C	mg	0.083361692	0.052928427	8.507578173
Other	Albania	ALB	1983	2930000	0	2799	0.877512254	ZN	Zinc	mg	0.001688922	0.001863364	64.59716565
Other	Albania	ALB	1983	2930000	0	2799	0.877512254	RIBF	Riboflavin	mg	0.001429389	0.00086073	1.382444788
Other	Albania	ALB	1983	2930000	0	2799	0.877512254	P	Phosphorus	mg	1.294947414	0.637139779	0.001815758
Other	Albania	ALB	1983	2930000	0	2799	0.877512254	FE	Iron	mg	0.004625083	0.007453225	85.22001899
Other	Albania	ALB	1983	2930000	0	2799	0.877512254	VITB6A	Vitamin B6	mg	0.001869008	0.000959147	0.007398237
Other	Albania	ALB	1983	2930000	0	2799	0.877512254	VITA_RAE	Vitamin A	mcg	0.000571927	0.000481884	26.97270238
Other	Albania	ALB	1983	2930000	0	2799	0.877512254	THIA	Thiamin	mg	0.00148296	0.000812881	0.30002355
Other	Albania	ALB	1983	2930000	0	2799	0.877512254	VITB12	Vitamin B12	mcg	2.72E-06	1.68E-06	15.84571958
Other	Albania	ALB	1984	3001000	0	2719	0.873092328	P	Phosphorus	mg	1.247098642	0.637069566	0.006401449
Other	Albania	ALB	1984	3001000	0	2719	0.873092328	MG	Magnesium	mg	0.50394496	0.243419303	0.000929855
Other	Albania	ALB	1984	3001000	0	2719	0.873092328	ZN	Zinc	mg	0.001665233	0.001868858	66.8519103
Other	Albania	ALB	1984	3001000	0	2719	0.873092328	CA	Calcium	mg	0.977035309	0.812932908	25.05111499
Other	Albania	ALB	1984	3001000	0	2719	0.873092328	CU	Copper	mcg	0.001532046	0.000594097	0.774444011
Other	Albania	ALB	1984	3001000	0	2719	0.873092328	NIA	Niacin	mg	0.0196902	0.009874255	0.003498627
Other	Albania	ALB	1984	3001000	0	2719	0.873092328	VITC	Vitamin C	mg	0.07396881	0.053114682	14.63320205
Other	Albania	ALB	1984	3001000	0	2719	0.873092328	THIA	Thiamin	mg	0.001446529	0.000814699	0.486717044
Other	Albania	ALB	1984	3001000	0	2719	0.873092328	FOL	Folate	mcg	0.000359484	0.000277123	16.09228849
Other	Albania	ALB	1984	3001000	0	2719	0.873092328	VITB6A	Vitamin B6	mg	0.001788179	0.000961619	0.029279406
Other	Albania	ALB	1984	3001000	0	2719	0.873092328	FE	Iron	mg	0.004522868	0.007473469	86.67084193
Other	Albania	ALB	1984	3001000	0	2719	0.873092328	VITB12	Vitamin B12	mcg	2.60E-06	1.68E-06	16.85812309
Other	Albania	ALB	1984	3001000	0	2719	0.873092328	VITA_RAE	Vitamin A	mcg	0.000525698	0.000482976	34.01353293
Other	Albania	ALB	1984	3001000	0	2719	0.873092328	RIBF	Riboflavin	mg	0.001375067	0.000862645	2.384956845
Other	Albania	ALB	1985	3078000	0	2564	0.868394174	VITA_RAE	Vitamin A	mcg	0.000494656	0.000483988	39.53195303
Other	Albania	ALB	1985	3078000	0	2564	0.868394174	P	Phosphorus	mg	1.177933012	0.636781288	0.03378001
Other	Albania	ALB	1985	3078000	0	2564	0.868394174	RIBF	Riboflavin	mg	0.00128203	0.000864403	5.364809628
Other	Albania	ALB	1985	3078000	0	2564	0.868394174	NIA	Niacin	mg	0.018481374	0.009894625	0.025899343
Other	Albania	ALB	1985	3078000	0	2564	0.868394174	FOL	Folate	mcg	0.000334832	0.00027766	24.62428213
Other	Albania	ALB	1985	3078000	0	2564	0.868394174	VITB12	Vitamin B12	mcg	2.57E-06	1.69E-06	17.19147308
Other	Albania	ALB	1985	3078000	0	2564	0.868394174	MG	Magnesium	mg	0.473646938	0.244164712	0.008513825
Other	Albania	ALB	1985	3078000	0	2564	0.868394174	ZN	Zinc	mg	0.001650742	0.001874004	68.31569543
Other	Albania	ALB	1985	3078000	0	2564	0.868394174	THIA	Thiamin	mg	0.001350236	0.000816377	1.463648616
Other	Albania	ALB	1985	3078000	0	2564	0.868394174	CA	Calcium	mg	0.896911063	0.813805688	36.67783722
Other	Albania	ALB	1985	3078000	0	2564	0.868394174	VITB6A	Vitamin B6	mg	0.001691946	0.000963988	0.126133607
Other	Albania	ALB	1985	3078000	0	2564	0.868394174	VITC	Vitamin C	mg	0.06677386	0.053289589	21.82433841
Other	Albania	ALB	1985	3078000	0	2564	0.868394174	FE	Iron	mg	0.004223877	0.00749078	90.22533299
Other	Albania	ALB	1985	3078000	0	2564	0.868394174	CU	Copper	mcg	0.001448719	0.000595408	1.114536898
Other	Albania	ALB	1986	3162000	0	2689	0.867746563	NIA	Niacin	mg	0.019591394	0.0099141	0.004721857
Other	Albania	ALB	1986	3162000	0	2689	0.867746563	RIBF	Riboflavin	mg	0.001303695	0.000866087	4.60681529
Other	Albania	ALB	1986	3162000	0	2689	0.867746563	MG	Magnesium	mg	0.498753267	0.244888621	0.001687141
Other	Albania	ALB	1986	3162000	0	2689	0.867746563	VITA_RAE	Vitamin A	mcg	0.000501062	0.000484959	38.56090019
Other	Albania	ALB	1986	3162000	0	2689	0.867746563	CA	Calcium	mg	0.919305031	0.814641828	33.42314404
Other	Albania	ALB	1986	3162000	0	2689	0.867746563	FE	Iron	mg	0.004547941	0.007508131	86.62043728
Other	Albania	ALB	1986	3162000	0	2689	0.867746563	P	Phosphorus	mg	1.207833415	0.636623653	0.016597766
Other	Albania	ALB	1986	3162000	0	2689	0.867746563	VITB6A	Vitamin B6	mg	0.001787283	0.00096615	0.033741445
Other	Albania	ALB	1986	3162000	0	2689	0.867746563	THIA	Thiamin	mg	0.001433244	0.000817978	0.608350439
Other	Albania	ALB	1986	3162000	0	2689	0.867746563	CU	Copper	mcg	0.001532053	0.000596654	0.795982273
Other	Albania	ALB	1986	3162000	0	2689	0.867746563	FOL	Folate	mcg	0.000371592	0.000278172	13.1472503
Other	Albania	ALB	1986	3162000	0	2689	0.867746563	VITC	Vitamin C	mg	0.071554823	0.053454629	17.11549596
Other	Albania	ALB	1986	3162000	0	2689	0.867746563	ZN	Zinc	mg	0.001653781	0.001878924	68.41378474
Other	Albania	ALB	1986	3162000	0	2689	0.867746563	VITB12	Vitamin B12	mcg	2.39E-06	1.69E-06	18.82253833
Other	Albania	ALB	1987	3252000	0	2493	0.875855738	NIA	Niacin	mg	0.017711315	0.009929531	0.085984366
Other	Albania	ALB	1987	3252000	0	2493	0.875855738	VITB12	Vitamin B12	mcg	2.44E-06	1.69E-06	18.36347591
Other	Albania	ALB	1987	3252000	0	2493	0.875855738	MG	Magnesium	mg	0.452102675	0.245475677	0.03800018
Other	Albania	ALB	1987	3252000	0	2493	0.875855738	RIBF	Riboflavin	mg	0.001267179	0.000867447	6.226363463
Other	Albania	ALB	1987	3252000	0	2493	0.875855738	FE	Iron	mg	0.004129289	0.007520811	91.36645121
Other	Albania	ALB	1987	3252000	0	2493	0.875855738	THIA	Thiamin	mg	0.001309513	0.000819286	2.304718703
Other	Albania	ALB	1987	3252000	0	2493	0.875855738	FOL	Folate	mcg	0.000332483	0.00027859	25.95194104
Other	Albania	ALB	1987	3252000	0	2493	0.875855738	VITC	Vitamin C	mg	0.065222852	0.053593373	24.12208112
Other	Albania	ALB	1987	3252000	0	2493	0.875855738	CU	Copper	mcg	0.001399457	0.000597644	1.404292096
Other	Albania	ALB	1987	3252000	0	2493	0.875855738	VITB6A	Vitamin B6	mg	0.001640852	0.000968038	0.271700629
Other	Albania	ALB	1987	3252000	0	2493	0.875855738	P	Phosphorus	mg	1.133835793	0.63619112	0.087730865
Other	Albania	ALB	1987	3252000	0	2493	0.875855738	CA	Calcium	mg	0.912705663	0.815140184	34.49568485
Other	Albania	ALB	1987	3252000	0	2493	0.875855738	VITA_RAE	Vitamin A	mcg	0.000485129	0.00048576	41.61759321
Other	Albania	ALB	1987	3252000	0	2493	0.875855738	ZN	Zinc	mg	0.001662205	0.001883049	68.05087056
Other	Albania	ALB	1988	3336000	0	2596	0.850945764	CA	Calcium	mg	0.935749681	0.8155333	31.15855664
Other	Albania	ALB	1988	3336000	0	2596	0.850945764	CU	Copper	mcg	0.001418138	0.000598553	1.309353423
Other	Albania	ALB	1988	3336000	0	2596	0.850945764	FE	Iron	mg	0.004274264	0.007531809	89.93568981
Other	Albania	ALB	1988	3336000	0	2596	0.850945764	VITA_RAE	Vitamin A	mcg	0.000429838	0.000486504	52.93630619
Other	Albania	ALB	1988	3336000	0	2596	0.850945764	P	Phosphorus	mg	1.169088363	0.635643576	0.039413671
Other	Albania	ALB	1988	3336000	0	2596	0.850945764	RIBF	Riboflavin	mg	0.001308813	0.000868697	4.562956732
Other	Albania	ALB	1988	3336000	0	2596	0.850945764	VITB6A	Vitamin B6	mg	0.001656133	0.000969881	0.232556689
Other	Albania	ALB	1988	3336000	0	2596	0.850945764	VITB12	Vitamin B12	mcg	2.61E-06	1.70E-06	16.99271821
Other	Albania	ALB	1988	3336000	0	2596	0.850945764	FOL	Folate	mcg	0.000341115	0.000278982	22.89266259
Other	Albania	ALB	1988	3336000	0	2596	0.850945764	MG	Magnesium	mg	0.464963257	0.2460238	0.018567698
Other	Albania	ALB	1988	3336000	0	2596	0.850945764	THIA	Thiamin	mg	0.001352612	0.000820505	1.532051448
Other	Albania	ALB	1988	3336000	0	2596	0.850945764	ZN	Zinc	mg	0.001690917	0.001886916	66.11081547
Other	Albania	ALB	1988	3336000	0	2596	0.850945764	NIA	Niacin	mg	0.018599966	0.009943645	0.024870033
Other	Albania	ALB	1988	3336000	0	2596	0.850945764	VITC	Vitamin C	mg	0.05352074	0.053723797	42.74785733
Other	Albania	ALB	1989	3404000	0	2569	0.881610724	VITA_RAE	Vitamin A	mcg	0.000479908	0.000487392	42.90959654
Other	Albania	ALB	1989	3404000	0	2569	0.881610724	P	Phosphorus	mg	1.161396343	0.635243099	0.046136831
Other	Albania	ALB	1989	3404000	0	2569	0.881610724	VITC	Vitamin C	mg	0.065926614	0.053878311	23.68490937
Other	Albania	ALB	1989	3404000	0	2569	0.881610724	NIA	Niacin	mg	0.018621419	0.009961253	0.025301794
Other	Albania	ALB	1989	3404000	0	2569	0.881610724	FOL	Folate	mcg	0.000358137	0.000279462	17.40160196
Other	Albania	ALB	1989	3404000	0	2569	0.881610724	RIBF	Riboflavin	mg	0.001345921	0.000870218	3.421514419
Other	Albania	ALB	1989	3404000	0	2569	0.881610724	VITB6A	Vitamin B6	mg	0.001694142	0.00097208	0.148315507
Other	Albania	ALB	1989	3404000	0	2569	0.881610724	CU	Copper	mcg	0.001444426	0.000599686	1.185510414
Other	Albania	ALB	1989	3404000	0	2569	0.881610724	MG	Magnesium	mg	0.45614934	0.246705586	0.034207996
Other	Albania	ALB	1989	3404000	0	2569	0.881610724	FE	Iron	mg	0.004365022	0.007546161	89.03323907
Other	Albania	ALB	1989	3404000	0	2569	0.881610724	THIA	Thiamin	mg	0.001357922	0.000821995	1.4879765
Other	Albania	ALB	1989	3404000	0	2569	0.881610724	VITB12	Vitamin B12	mcg	2.63E-06	1.70E-06	16.87009049
Other	Albania	ALB	1989	3404000	0	2569	0.881610724	ZN	Zinc	mg	0.001760796	0.001891482	60.88671797
Other	Albania	ALB	1989	3404000	0	2569	0.881610724	CA	Calcium	mg	0.972710607	0.816215345	26.13758923
Other	Albania	ALB	1990	3447000	0	2560	0.901048587	FOL	Folate	mcg	0.000355429	0.000280432	18.63460842
Other	Albania	ALB	1990	3447000	0	2560	0.901048587	NIA	Niacin	mg	0.018807929	0.009997013	0.021140618
Other	Albania	ALB	1990	3447000	0	2560	0.901048587	FE	Iron	mg	0.004373185	0.0075516	88.97723654
Other	Albania	ALB	1990	3447000	0	2560	0.901048587	VITC	Vitamin C	mg	0.068733817	0.054173658	20.88198325
Other	Albania	ALB	1990	3447000	0	2560	0.901048587	VITA_RAE	Vitamin A	mcg	0.000522408	0.000489042	35.62851506
Other	Albania	ALB	1990	3447000	0	2560	0.901048587	CU	Copper	mcg	0.001437074	0.000602055	1.252181214
Other	Albania	ALB	1990	3447000	0	2560	0.901048587	ZN	Zinc	mg	0.001825738	0.001899684	56.18663482
Other	Albania	ALB	1990	3447000	0	2560	0.901048587	VITB12	Vitamin B12	mcg	2.86E-06	1.71E-06	15.18160916
Other	Albania	ALB	1990	3447000	0	2560	0.901048587	MG	Magnesium	mg	0.455770271	0.248046377	0.040440956
Other	Albania	ALB	1990	3447000	0	2560	0.901048587	CA	Calcium	mg	1.080225032	0.81960234	14.45823387
Other	Albania	ALB	1990	3447000	0	2560	0.901048587	VITB6A	Vitamin B6	mg	0.001749994	0.00097783	0.079241949
Other	Albania	ALB	1990	3447000	0	2560	0.901048587	P	Phosphorus	mg	1.206816052	0.634736001	0.015598473
Other	Albania	ALB	1990	3447000	0	2560	0.901048587	THIA	Thiamin	mg	0.001388197	0.000824929	1.142217253
Other	Albania	ALB	1990	3447000	0	2560	0.901048587	RIBF	Riboflavin	mg	0.001458868	0.000873116	1.266765665
Other	Albania	ALB	1991	3460000	0	2573	0.898791815	VITB12	Vitamin B12	mcg	3.10E-06	1.71E-06	13.67059602
Other	Albania	ALB	1991	3460000	0	2573	0.898791815	FOL	Folate	mcg	0.000344218	0.00028063	22.50341426
Other	Albania	ALB	1991	3460000	0	2573	0.898791815	VITB6A	Vitamin B6	mg	0.001721734	0.000979481	0.12178885
Other	Albania	ALB	1991	3460000	0	2573	0.898791815	P	Phosphorus	mg	1.196412638	0.633480551	0.018932456
Other	Albania	ALB	1991	3460000	0	2573	0.898791815	VITA_RAE	Vitamin A	mcg	0.000530654	0.000489346	34.33148283
Other	Albania	ALB	1991	3460000	0	2573	0.898791815	THIA	Thiamin	mg	0.001341622	0.000825543	1.858939664
Other	Albania	ALB	1991	3460000	0	2573	0.898791815	ZN	Zinc	mg	0.001930332	0.001901301	47.56494079
Other	Albania	ALB	1991	3460000	0	2573	0.898791815	RIBF	Riboflavin	mg	0.001490128	0.000873631	0.933036044
Other	Albania	ALB	1991	3460000	0	2573	0.898791815	NIA	Niacin	mg	0.01851159	0.010004054	0.033492019
Other	Albania	ALB	1991	3460000	0	2573	0.898791815	VITC	Vitamin C	mg	0.066751218	0.05425113	23.24382068
Other	Albania	ALB	1991	3460000	0	2573	0.898791815	CU	Copper	mcg	0.00140761	0.000602578	1.42452354
Other	Albania	ALB	1991	3460000	0	2573	0.898791815	MG	Magnesium	mg	0.438499902	0.248343754	0.109642201
Other	Albania	ALB	1991	3460000	0	2573	0.898791815	FE	Iron	mg	0.00437725	0.007552343	88.93658293
Other	Albania	ALB	1991	3460000	0	2573	0.898791815	CA	Calcium	mg	1.142827207	0.819717167	9.443847541
Other	Albania	ALB	1992	3447000	0	2660	0.927060347	MG	Magnesium	mg	0.474606752	0.248941803	0.014392979
Other	Albania	ALB	1992	3447000	0	2660	0.927060347	NIA	Niacin	mg	0.020601537	0.010019027	0.001194888
Other	Albania	ALB	1992	3447000	0	2660	0.927060347	CA	Calcium	mg	1.294887728	0.820751421	2.707599535
Other	Albania	ALB	1992	3447000	0	2660	0.927060347	P	Phosphorus	mg	1.292978458	0.633038483	0.00152311
Other	Albania	ALB	1992	3447000	0	2660	0.927060347	VITC	Vitamin C	mg	0.092185644	0.054372749	5.902611178
Other	Albania	ALB	1992	3447000	0	2660	0.927060347	ZN	Zinc	mg	0.0020863	0.001904296	35.11186873
Other	Albania	ALB	1992	3447000	0	2660	0.927060347	RIBF	Riboflavin	mg	0.001682246	0.00087474	0.104502528
Other	Albania	ALB	1992	3447000	0	2660	0.927060347	FE	Iron	mg	0.005037099	0.007560991	80.55659398
Other	Albania	ALB	1992	3447000	0	2660	0.927060347	CU	Copper	mcg	0.001600754	0.0006036	0.646034103
Other	Albania	ALB	1992	3447000	0	2660	0.927060347	VITA_RAE	Vitamin A	mcg	0.000690861	0.000489951	15.50690507
Other	Albania	ALB	1992	3447000	0	2660	0.927060347	THIA	Thiamin	mg	0.001507366	0.000826734	0.303233888
Other	Albania	ALB	1992	3447000	0	2660	0.927060347	FOL	Folate	mcg	0.000404721	0.000281019	7.114766393
Other	Albania	ALB	1992	3447000	0	2660	0.927060347	VITB6A	Vitamin B6	mg	0.001941478	0.000981793	0.004616168
Other	Albania	ALB	1992	3447000	0	2660	0.927060347	VITB12	Vitamin B12	mcg	3.48E-06	1.71E-06	11.69189025
Other	Albania	ALB	1993	3417000	0	2793	0.942544209	VITB6A	Vitamin B6	mg	0.002091837	0.000984537	0.000341745
Other	Albania	ALB	1993	3417000	0	2793	0.942544209	MG	Magnesium	mg	0.505019519	0.249739387	0.002168572
Other	Albania	ALB	1993	3417000	0	2793	0.942544209	VITA_RAE	Vitamin A	mcg	0.000780782	0.000490746	9.747166394
Other	Albania	ALB	1993	3417000	0	2793	0.942544209	THIA	Thiamin	mg	0.001608052	0.000828301	0.085066606
Other	Albania	ALB	1993	3417000	0	2793	0.942544209	ZN	Zinc	mg	0.002148701	0.001908121	30.70151905
Other	Albania	ALB	1993	3417000	0	2793	0.942544209	VITB12	Vitamin B12	mcg	3.69E-06	1.72E-06	10.78280373
Other	Albania	ALB	1993	3417000	0	2793	0.942544209	VITC	Vitamin C	mg	0.107307223	0.054520599	2.557511677
Other	Albania	ALB	1993	3417000	0	2793	0.942544209	RIBF	Riboflavin	mg	0.001829981	0.000876227	0.014266822
Other	Albania	ALB	1993	3417000	0	2793	0.942544209	P	Phosphorus	mg	1.391735726	0.633249332	8.29E-05
Other	Albania	ALB	1993	3417000	0	2793	0.942544209	FOL	Folate	mcg	0.00042745	0.000281538	4.203325234
Other	Albania	ALB	1993	3417000	0	2793	0.942544209	CA	Calcium	mg	1.38690188	0.822482956	1.108450973
Other	Albania	ALB	1993	3417000	0	2793	0.942544209	CU	Copper	mcg	0.001748094	0.000604955	0.361810727
Other	Albania	ALB	1993	3417000	0	2793	0.942544209	FE	Iron	mg	0.007214407	0.00757503	47.3682783
Other	Albania	ALB	1993	3417000	0	2793	0.942544209	NIA	Niacin	mg	0.021981047	0.010039269	9.77E-05
Other	Albania	ALB	1994	3384000	0	2876	0.946405258	NIA	Niacin	mg	0.022819921	0.010058771	1.94E-05
Other	Albania	ALB	1994	3384000	0	2876	0.946405258	THIA	Thiamin	mg	0.001691343	0.000829789	0.026915077
Other	Albania	ALB	1994	3384000	0	2876	0.946405258	P	Phosphorus	mg	1.532023237	0.633775327	7.17E-07
Other	Albania	ALB	1994	3384000	0	2876	0.946405258	RIBF	Riboflavin	mg	0.002085558	0.000877623	0.000223855
Other	Albania	ALB	1994	3384000	0	2876	0.946405258	CU	Copper	mcg	0.00181701	0.00060627	0.279629215
Other	Albania	ALB	1994	3384000	0	2876	0.946405258	CA	Calcium	mg	1.605514683	0.824392894	0.079326526
Other	Albania	ALB	1994	3384000	0	2876	0.946405258	ZN	Zinc	mg	0.002281707	0.001911552	21.929886
Other	Albania	ALB	1994	3384000	0	2876	0.946405258	FOL	Folate	mcg	0.000439025	0.000282043	3.17766182
Other	Albania	ALB	1994	3384000	0	2876	0.946405258	VITA_RAE	Vitamin A	mcg	0.000830297	0.000491481	7.55303308
Other	Albania	ALB	1994	3384000	0	2876	0.946405258	FE	Iron	mg	0.007463461	0.007589082	44.06580507
Other	Albania	ALB	1994	3384000	0	2876	0.946405258	VITB12	Vitamin B12	mcg	4.44E-06	1.72E-06	8.193268149
Other	Albania	ALB	1994	3384000	0	2876	0.946405258	VITC	Vitamin C	mg	0.113894321	0.054654819	1.793166353
Other	Albania	ALB	1994	3384000	0	2876	0.946405258	MG	Magnesium	mg	0.526949238	0.250500856	0.000506616
Other	Albania	ALB	1994	3384000	0	2876	0.946405258	VITB6A	Vitamin B6	mg	0.00219816	0.000987193	4.63E-05
Other	Albania	ALB	1995	3358000	0	2718	0.951096294	VITB6A	Vitamin B6	mg	0.002099485	0.000989485	0.000360858
Other	Albania	ALB	1995	3358000	0	2718	0.951096294	VITB12	Vitamin B12	mcg	5.08E-06	1.72E-06	6.610406085
Other	Albania	ALB	1995	3358000	0	2718	0.951096294	ZN	Zinc	mg	0.002466351	0.001913965	12.41613523
Other	Albania	ALB	1995	3358000	0	2718	0.951096294	VITC	Vitamin C	mg	0.106538617	0.054754154	2.739974968
Other	Albania	ALB	1995	3358000	0	2718	0.951096294	THIA	Thiamin	mg	0.001574718	0.000830932	0.14237351
Other	Albania	ALB	1995	3358000	0	2718	0.951096294	VITA_RAE	Vitamin A	mcg	0.000829885	0.000492025	7.606302215
Other	Albania	ALB	1995	3358000	0	2718	0.951096294	CU	Copper	mcg	0.001692148	0.000607328	0.464885781
Other	Albania	ALB	1995	3358000	0	2718	0.951096294	RIBF	Riboflavin	mg	0.00220093	0.000878673	2.64E-05
Other	Albania	ALB	1995	3358000	0	2718	0.951096294	P	Phosphorus	mg	1.566659704	0.634395509	2.07E-07
Other	Albania	ALB	1995	3358000	0	2718	0.951096294	CA	Calcium	mg	1.737536656	0.826134824	0.011782405
Other	Albania	ALB	1995	3358000	0	2718	0.951096294	MG	Magnesium	mg	0.487103007	0.251079947	0.00849139
Other	Albania	ALB	1995	3358000	0	2718	0.951096294	FE	Iron	mg	0.006705487	0.007599932	55.26615634
Other	Albania	ALB	1995	3358000	0	2718	0.951096294	FOL	Folate	mcg	0.000398769	0.000282456	8.493157513
Other	Albania	ALB	1995	3358000	0	2718	0.951096294	NIA	Niacin	mg	0.020562311	0.010073979	0.001560016
Other	Albania	ALB	1996	3341000	0	2832	0.950953511	FOL	Folate	mcg	0.000420897	0.000283274	5.267721167
Other	Albania	ALB	1996	3341000	0	2832	0.950953511	ZN	Zinc	mg	0.00253593	0.001920302	9.985850028
Other	Albania	ALB	1996	3341000	0	2832	0.950953511	P	Phosphorus	mg	1.657660409	0.63549071	6.22E-09
Other	Albania	ALB	1996	3341000	0	2832	0.950953511	FE	Iron	mg	0.007081188	0.007625095	49.97857298
Other	Albania	ALB	1996	3341000	0	2832	0.950953511	VITC	Vitamin C	mg	0.115937341	0.054978161	1.661426501
Other	Albania	ALB	1996	3341000	0	2832	0.950953511	MG	Magnesium	mg	0.511276937	0.252226353	0.001993567
Other	Albania	ALB	1996	3341000	0	2832	0.950953511	NIA	Niacin	mg	0.021492954	0.010104964	0.000327393
Other	Albania	ALB	1996	3341000	0	2832	0.950953511	CU	Copper	mcg	0.001798629	0.000609383	0.311752343
Other	Albania	ALB	1996	3341000	0	2832	0.950953511	VITB6A	Vitamin B6	mg	0.002187017	0.000993296	7.66E-05
Other	Albania	ALB	1996	3341000	0	2832	0.950953511	RIBF	Riboflavin	mg	0.002329524	0.00088112	2.13E-06
Other	Albania	ALB	1996	3341000	0	2832	0.950953511	CA	Calcium	mg	1.856965274	0.82889579	0.001780243
Other	Albania	ALB	1996	3341000	0	2832	0.950953511	VITB12	Vitamin B12	mcg	5.32E-06	1.73E-06	6.163009663
Other	Albania	ALB	1996	3341000	0	2832	0.950953511	THIA	Thiamin	mg	0.001626729	0.000833321	0.075259529
Other	Albania	ALB	1996	3341000	0	2832	0.950953511	VITA_RAE	Vitamin A	mcg	0.000870639	0.000493352	6.209373996
Other	Albania	ALB	1997	3331000	0	2722	0.949612172	FOL	Folate	mcg	0.000411817	0.000283863	6.647852086
Other	Albania	ALB	1997	3331000	0	2722	0.949612172	FE	Iron	mg	0.00694426	0.007641658	52.22411225
Other	Albania	ALB	1997	3331000	0	2722	0.949612172	MG	Magnesium	mg	0.479717577	0.252960958	0.016812742
Other	Albania	ALB	1997	3331000	0	2722	0.949612172	NIA	Niacin	mg	0.020386784	0.01012555	0.002521768
Other	Albania	ALB	1997	3331000	0	2722	0.949612172	ZN	Zinc	mg	0.002335446	0.0019244	19.64450168
Other	Albania	ALB	1997	3331000	0	2722	0.949612172	P	Phosphorus	mg	1.479299456	0.636140434	5.74E-06
Other	Albania	ALB	1997	3331000	0	2722	0.949612172	VITC	Vitamin C	mg	0.108375793	0.055130246	2.576295972
Other	Albania	ALB	1997	3331000	0	2722	0.949612172	CA	Calcium	mg	1.649279066	0.830856332	0.051272294
Other	Albania	ALB	1997	3331000	0	2722	0.949612172	CU	Copper	mcg	0.001693115	0.00061081	0.481377583
Other	Albania	ALB	1997	3331000	0	2722	0.949612172	RIBF	Riboflavin	mg	0.002073255	0.000882727	0.000346804
Other	Albania	ALB	1997	3331000	0	2722	0.949612172	VITB6A	Vitamin B6	mg	0.002062813	0.000996282	0.000925914
Other	Albania	ALB	1997	3331000	0	2722	0.949612172	THIA	Thiamin	mg	0.001558633	0.000834919	0.193014662
Other	Albania	ALB	1997	3331000	0	2722	0.949612172	VITA_RAE	Vitamin A	mcg	0.000817287	0.00049423	8.286866314
Other	Albania	ALB	1997	3331000	0	2722	0.949612172	VITB12	Vitamin B12	mcg	4.80E-06	1.73E-06	7.322135015
Other	Albania	ALB	1998	3325000	0	2723	0.953030173	VITC	Vitamin C	mg	0.121425985	0.055249477	1.265635097
Other	Albania	ALB	1998	3325000	0	2723	0.953030173	NIA	Niacin	mg	0.020818612	0.010141084	0.001267884
Other	Albania	ALB	1998	3325000	0	2723	0.953030173	FE	Iron	mg	0.007340558	0.007653032	46.63614603
Other	Albania	ALB	1998	3325000	0	2723	0.953030173	VITB6A	Vitamin B6	mg	0.002154394	0.00099896	0.000185907
Other	Albania	ALB	1998	3325000	0	2723	0.953030173	VITB12	Vitamin B12	mcg	4.74E-06	1.74E-06	7.498799737
Other	Albania	ALB	1998	3325000	0	2723	0.953030173	RIBF	Riboflavin	mg	0.002062235	0.000883948	0.000443003
Other	Albania	ALB	1998	3325000	0	2723	0.953030173	FOL	Folate	mcg	0.000421853	0.00028435	5.349298782
Other	Albania	ALB	1998	3325000	0	2723	0.953030173	VITA_RAE	Vitamin A	mcg	0.000859792	0.000494913	6.669312027
Other	Albania	ALB	1998	3325000	0	2723	0.953030173	MG	Magnesium	mg	0.486320043	0.253503384	0.011958478
Other	Albania	ALB	1998	3325000	0	2723	0.953030173	P	Phosphorus	mg	1.482263166	0.636567689	5.36E-06
Other	Albania	ALB	1998	3325000	0	2723	0.953030173	CU	Copper	mcg	0.001808301	0.000611927	0.309122874
Other	Albania	ALB	1998	3325000	0	2723	0.953030173	ZN	Zinc	mg	0.002383608	0.001927567	17.19838645
Other	Albania	ALB	1998	3325000	0	2723	0.953030173	CA	Calcium	mg	1.629538152	0.832422917	0.070658351
Other	Albania	ALB	1998	3325000	0	2723	0.953030173	THIA	Thiamin	mg	0.001599307	0.000836158	0.117396752
Other	Albania	ALB	1999	3318000	0	2790	0.953857987	CU	Copper	mcg	0.001858898	0.000613277	0.257839135
Other	Albania	ALB	1999	3318000	0	2790	0.953857987	FE	Iron	mg	0.007712738	0.007665719	41.7419586
Other	Albania	ALB	1999	3318000	0	2790	0.953857987	MG	Magnesium	mg	0.50432863	0.254215174	0.004151863
Other	Albania	ALB	1999	3318000	0	2790	0.953857987	NIA	Niacin	mg	0.022642255	0.010160655	4.47E-05
Other	Albania	ALB	1999	3318000	0	2790	0.953857987	FOL	Folate	mcg	0.00042915	0.000284949	4.581518565
Other	Albania	ALB	1999	3318000	0	2790	0.953857987	P	Phosphorus	mg	1.53420307	0.637172582	8.94E-07
Other	Albania	ALB	1999	3318000	0	2790	0.953857987	THIA	Thiamin	mg	0.001650557	0.00083775	0.061016576
Other	Albania	ALB	1999	3318000	0	2790	0.953857987	VITA_RAE	Vitamin A	mcg	0.000816309	0.000495814	8.444357193
Other	Albania	ALB	1999	3318000	0	2790	0.953857987	ZN	Zinc	mg	0.002427233	0.001931875	15.25278382
Other	Albania	ALB	1999	3318000	0	2790	0.953857987	VITB12	Vitamin B12	mcg	4.74E-06	1.74E-06	7.51877431
Other	Albania	ALB	1999	3318000	0	2790	0.953857987	VITB6A	Vitamin B6	mg	0.002220719	0.001002149	5.76E-05
[truncated: 109,819 more rows]
